# Supplementary material for: Multiple introductions of multidrug-resistant typhoid associated with acute infection and asymptomatic carriage, Kenya
Source: eLife journal article supplement (doi:10.7554/elife.67852), 2021-09-13
Supplement: supp [file elife-67852-supp-v1.zip]

Archive with 19 entries (19 files):
- elife_poa_e67852_Transparent_Reporting_File.docx
- elife_poa_e67852_Supplementary_file_1.xlsx
- elife_poa_e67852_Supplementary_file_2.xlsx
- elife_poa_e67852_Supplementary_file_3.xlsx
- elife_poa_e67852_Supplementary_file_4.xlsx
- elife_poa_e67852_Supplementary_file_5.xlsx
- elife_poa_e67852_Supplementary_file_6.docx
- elife_poa_e67852_Supplementary_file_7.docx
- elife_poa_e67852_Supplementary_file_8.docx
- elife_poa_e67852_Supplementary_file_9.docx
- elife_poa_e67852_Supplementary_file_10.docx
- elife_poa_e67852_Supplementary_file_11.docx
- elife_poa_e67852_Supplementary_file_12.docx
- elife_poa_e67852_Supplementary_file_13.xlsx
- elife_poa_e67852_Figure_2_figure_supplement_1.pdf
- elife_poa_e67852_Figure_3_figure_supplement_1.pdf
- elife_poa_e67852_Figure_4_figure_supplement_1.pdf
- elife_poa_e67852_Figure_4_figure_supplement_2.pdf
- elife_poa_e67852_Figure_4_figure_supplement_3.pdf
