# Supplementary material for: Multiple introductions of multidrug-resistant typhoid associated with acute infection and asymptomatic carriage, Kenya
Source: eLife journal article supplement (doi:10.7554/elife.67852), 2021-09-13

A

## Cases

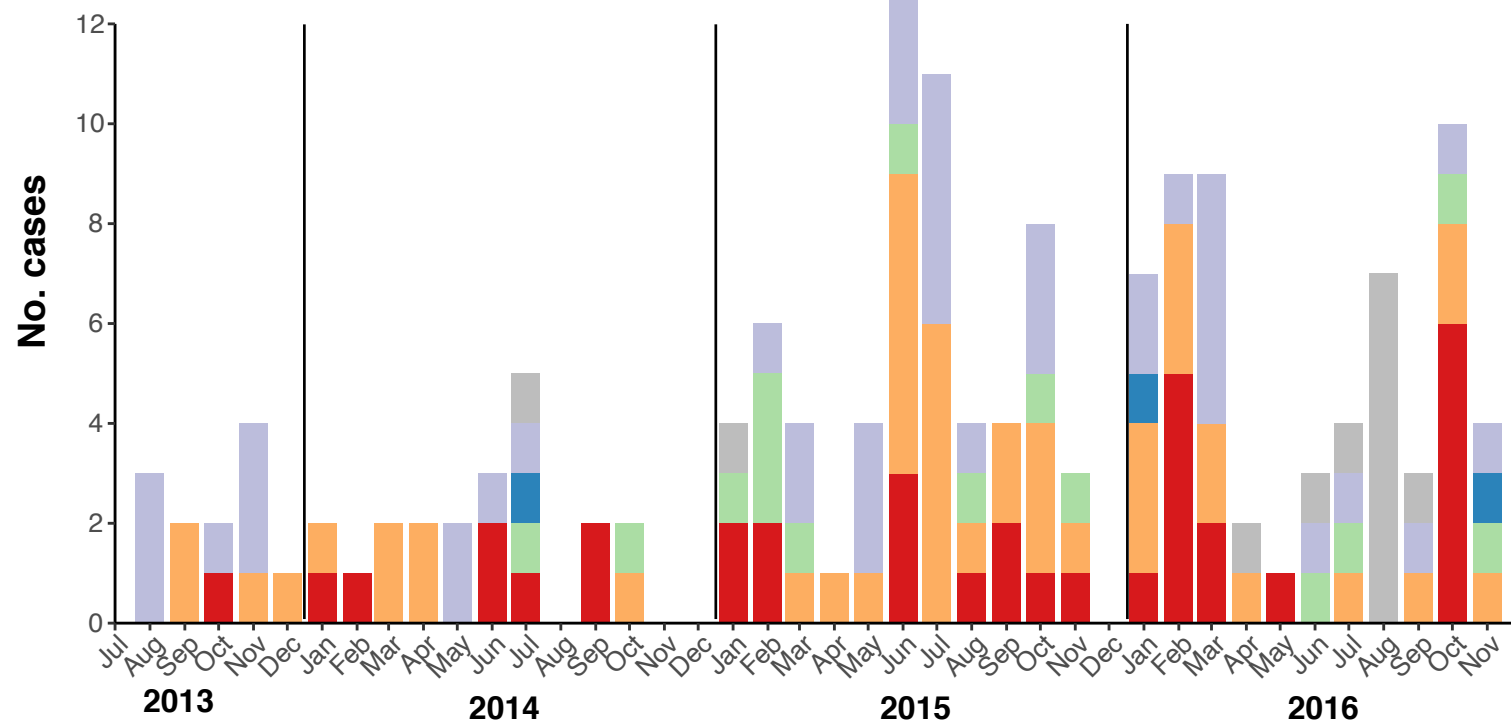

B

## Carriers

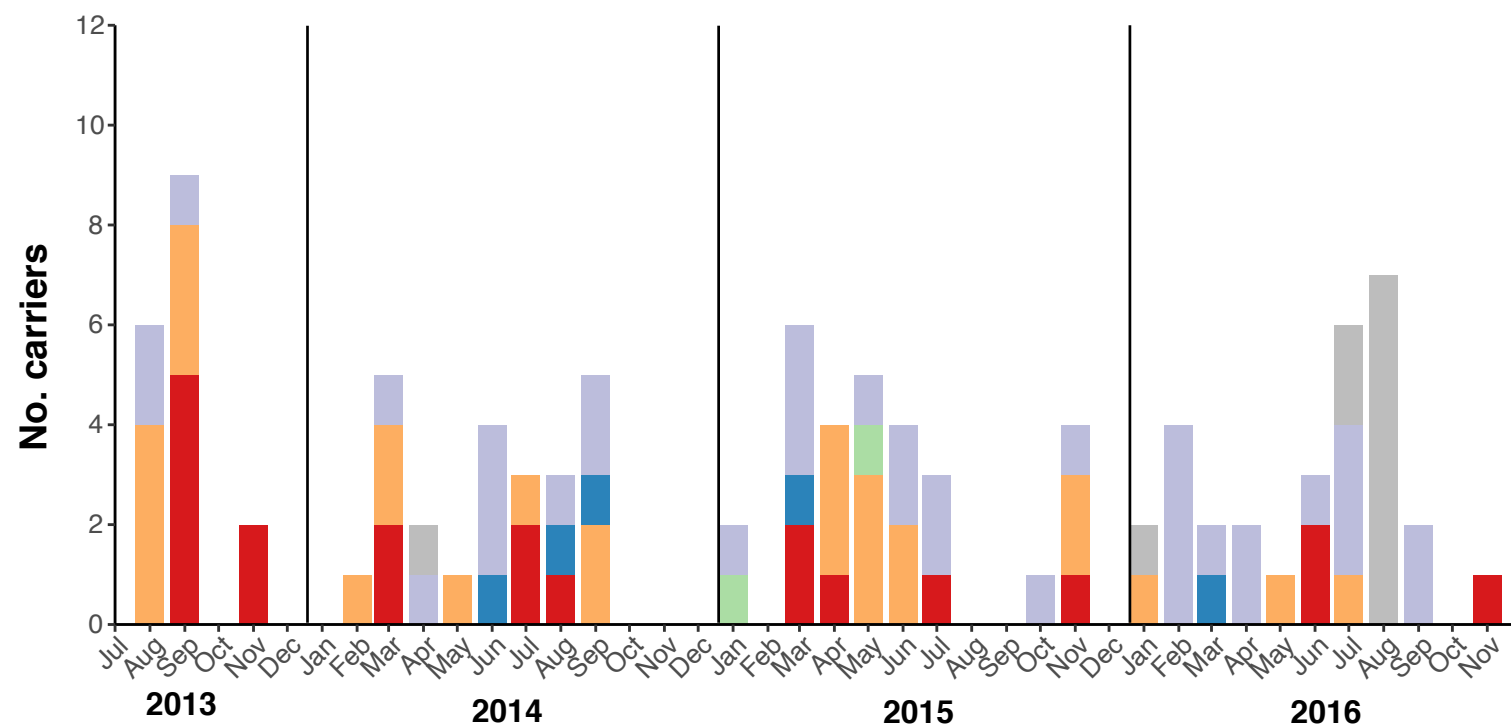

## Genotype

- 4.3.1.1.EA1
- 4.3.1.2.EA2
- 4.3.1.2.EA3
- Non-H58
- Unknown (not sequenced)
- Genomic data did not confirm *S.Typhi*

## Climate conditions

- Average rainfall/precipitation
- High rainfall (>75mm)
- Temperature range (average min-max)
- High maximum temperature (>26°C)
- High minimum temperature (>14°C)

C

## Climate

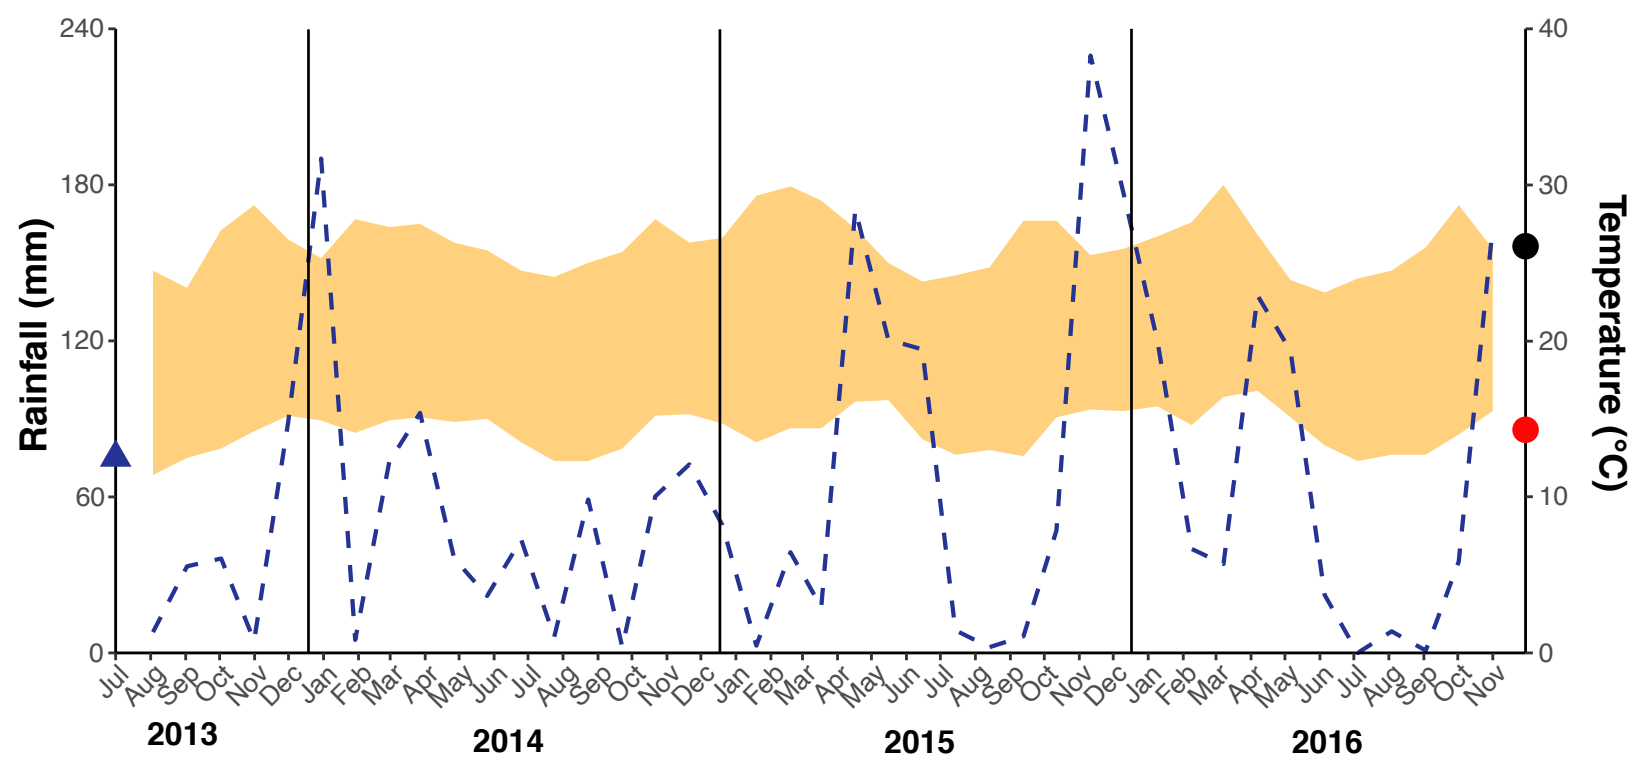

Supplement: supp [file elife-67852-supp-v1.zip › elife_poa_e67852_Figure_3_figure_supplement_1.pdf]
