# Supplementary material for: Multiple introductions of multidrug-resistant typhoid associated with acute infection and asymptomatic carriage, Kenya
Source: eLife journal article supplement (doi:10.7554/elife.67852), 2021-09-13
Supplement: supp [file elife-67852-supp-v1.zip › elife_poa_e67852_Supplementary_file_1.xlsx]

## Sheet: Supplementary_Table_1_Typhi_Seq
Lab_ID	Isolation_date	Sample_source	Location_clinic	Location_zone	Within_study_site	Patient_age	Patient_sex	Status	Bacteriology_typing	Genomic_typing	Analysis_inclusion_or_exclusion	Lane_and_tree_ID	Accession_number	Typhi_genotype	IncHI1_Plasmid	IncHI1_Plasmid_PST	MDR_chromosome_insertion_site	AMR_genes	QRDR_mutations	CAZ_Zone_mm	CAZ_Interpretation	AMP_Zone_mm	AMP_Interpretation	CTX_Zone_mm	CTX_Interpretation	CRO_Zone_mm	CRO_Interpretation	CPD_Zone_mm	CPD_Interpretation	CIP_Zone_mm	CIP_Interpretation	NAL_Zone_mm	NAL_Interpretation	TCY_Zone_mm	TCY_Interpretation	SXT_Zone_mm	SXT_Interpretation	CHL_Zone_mm	CHL_Interpretation
MR4478	2016-07-13	Stool	Ruben	Rurii	Yes	1 yrs. 3 mo.	F	Control	E. coli spp+ Salmonella Typhi	Enterobacter spp.	Non-Typhi organism detected	22306_3_251	ERR4010144	-	-	-	-	-	-	24	S	18	S	30	S	27	S	24	S	28	I	18	I	21	S	27	S	23	S
MCC2873	2016-06-29	Stool	City council	Wapewape	Yes	1 yrs. 3 mo.	F	Control	Proteus spp + Salmonella Typhi	E. coli	Non-Typhi organism detected	22306_3_242	ERR4010142	-	-	-	-	-	-	29	S	6	R	31	S	34	S	30	S	37	S	27	S	6	R	8	R	6	R
MR3470	2015-07-31	Blood	Ruben	Simbacool	Yes	3 yrs. 6 mo.	F	Case	Salmonella enteritidis	S. Typhi	Included	22204_7_178	ERR4010055	4.3.1.2.EA2	Yes	6	-	catA1 dfrA7 strA strB sul2 sul1 blaTEM-1 tetB	gyrB-S464F	27	S	24	S	29	S	29	S	27	S	33	S	24	S	25	S	28	S	21	S
MMM5660	2016-09-26	Blood	Njenga	Quarry	Yes	6 yrs.	M	Case	Salmonella Typhi	S. Agona ST13	Non-Typhi organism detected	22204_7_194	ERR4057715	-	-	-	-	-	-	26	S	22	S	30	S	29	S	24	S	31	S	23	S	21	S	27	S	25	S
MCC3187	2016-09-14	Stool	City council	Plot 10	No	2 yrs. 1 mo.	M	Control	Klebsiella spp + Salmonella Typhi	Enterobacter spp.	Non-Typhi organism detected	22204_7_191	ERR4057714	-	-	-	-	-	-	8	R	6	R	25	I	30	S	23	S	31	S	20	S	20	S	28	S	30	S
MR4670	2016-09-21	Stool	Ruben	Vietnam	Yes	5 yrs. 10 mo.	M	Control	Klebsiella spp + Salmonella Typhi	E. coli ST93	Non-Typhi organism detected	24276_3_275	ERR4010164	-	-	-	-	-	-	30	S	21	S	33	S	32	S	25	S	31	S	24	S	16	S	6	R	23	S
MCC3298	2016-10-17	Blood	City council	Tassia	No	3 yrs. 4 mo.	M	Case	Salmonella Typhi	Acinetobacter spp.	Non-Typhi organism detected	24276_3_191	ERR4010154	-	-	-	-	-	-	30	S	27	S	33	S	31	S	30	S	26	I	18	I	24	S	31	S	22	S
MCC3379	2016-11-09	Blood	City council	Plot 10	No	3 yrs. 3 mo.	M	Case	Salmonella Typhi	Acinetobacter spp.	Non-Typhi organism detected	24276_3_192	ERR4010155	-	-	-	-	-	-	26	S	29	S	34	S	30	S	30	S	26	I	18	I	26	S	31	S	23	S
MMM191	2013-09-04	Stool	Njenga	AA/MCC	Yes	1 yrs. 6 mo.	M	Control	E. coli spp + Salmonella Typhi	S. Typhi	Included in H58 phylogeny	22204_8_178	ERR4921815	4.3.1.1.EA1	Yes	6	-	catA1 dfrA7 strA strB sul1 sul2 blaTEM-1 tetB	-	26	S	6	R	31	S	30	S	27	S	33	S	26	S	6	R	6	R	6	R
MR835	2014-01-23	Blood	Ruben	Lungalunga	No	4 yrs. 6 mo.	M	Case	Salmonella Typhi	S. Typhi	Included	22204_8_60	ERR4921812	4.3.1.2.EA2	Yes	6	-	catA1 dfrA7 sul1 tetB	gyrB-S464F	29	S	29	S	34	S	34	S	30	S	33	S	23	S	6	R	24	S	6	R
MR1063	2014-03-05	Stool	Ruben	Vietnam	Yes	1 yrs. 6 mo.	F	Control	Salmonella Typhi	S. Typhi	Included	22204_8_59	ERR4921811	4.3.1.1.EA1	Yes	6	-	catA1 dfrA7 strA strB sul2 sul1 blaTEM-1 tetB	-	28	S	6	R	32	S	30	S	30	S	33	S	27	S	6	R	6	R	6	R
MB1425	2015-09-03	Blood	Mbagathi hospital	Gatwikira	No	8 yrs.	M	Case	Salmonella Typhi	S. Typhi	Included	22204_8_29	ERR4921810	4.3.1.1.EA1	Yes	untypeable	-	catA1 dfrA7 strA strB sul2 sul1 blaTEM-1 tetB	-	28	S	6	R	34	S	32	S	30	S	33	S	27	S	6	R	10	R	6	R
MB1638	2015-10-16	Blood	Mbagathi hospital	Pumwani	No	12 yrs. 10 mo.	F	Case	Salmonella Typhi	S. Typhi	Included	22204_8_16	ERR4921809	4.3.1.2.EA3	-	-	near_cyaA	catA1 dfrA7 strA strB sul2 sul1 blaTEM-1	gyrA-S83Y	26	S	6	R	32	S	28	S	28	S	24	I	6	R	24	S	6	R	6	R
MMM4044	2015-10-12	Stool	Njenga	Quarry	Yes	6 yrs.	M	Case	Salmonella Typhi	S. Typhimurium ST19	Non-Typhi organism detected	22204_8_10	ERR4921808	-	-	-	-	-	-	23	S	17	S	32	S	30	S	30	S	33	S	24	S	22	S	31	S	27	S
MB2386	2016-05-10	Stool	Mbagathi hospital	Kibera	No	11 yrs. 1 mo.	F	Control	Klebsiella spp + Salmonella Typhi	S. Typhi	Included	22204_8_165	ERR4921814	4.3.1.2.EA2	Yes	6	-	catA1 dfrA7 strA strB sul2 sul1 blaTEM-1 tetB	gyrB-S464F	30	S	6	R	33	S	31	S	30	S	32	S	22	S	6	R	6	R	6	R
MCC800	2014-08-25	Stool	City council	Motomoto	Yes	5 mo.	M	Control	No growth	S. Typhi	Included	22204_8_91	ERR4921813	4.3.1.1.EA1	Yes	6	-	catA1 dfrA7 strA strB sul2 sul1 blaTEM-1 tetB	gyrB-S464F	25	S	6	R	36	S	33	S	28	S	32	S	21	S	6	R	6	R	6	R
MR4799	2016-10-25	Blood	Ruben	Mombasa	Yes	5 yrs. 4 mo.	M	Case	Salmonella Typhi	S. Typhi	Included in H58 phylogeny	24276_3_276	ERR3332782	4.3.1.2.EA2	-	-	-	-	gyrB-S464F	31	S	28	S	34	S	34	S	32	S	29	I	17	I	25	S	32	S	26	S
MMM5877	2016-11-01	Stool	Njenga	Tassia	No	10 yrs.	F	Case	Salmonella Typhi + Citrobacter spp	S. Typhi	Included	24276_3_240	ERR3332781	2.5.0	-	-	-	-	-	29	S	28	S	34	S	32	S	29	S	26	I	18	I	26	S	31	S	26	S
MMM5742	2016-10-10	Blood	Njenga	Vietnam	Yes	1 yrs.	M	Case	Salmonella Typhi	S. Typhi	Included in H58 phylogeny	24276_3_238	ERR3332780	4.3.1.1.EA1	-	-	near_cyaA	catA1 dfrA7 strA strB sul1 sul2 blaTEM-1	-	26	S	6	R	34	S	32	S	29	S	34	S	26	S	26	S	6	R	6	R
MB3007	2016-11-03	Stool	Mbagathi hospital	Korogocho	No	14 yrs. 4 mo.	M	Control	E. coli spp+ Klebsiella spp + Salmonella Typhi	S. Typhi	Included in H58 phylogeny	24276_3_150	ERR3332779	4.3.1.1.EA1	Yes	6	-	catA1 dfrA7 strA strB sul1 sul2 blaTEM-1 tetB	-	28	S	6	R	34	S	31	S	26	S	36	S	27	S	6	R	6	R	6	R
MB2962	2016-10-26	Stool	Mbagathi hospital	Kibra	No	3 yrs.	F	Case	Klebsiella spp + Salmonella Typhi	S. Typhi	Included in H58 phylogeny	24276_3_149	ERR3332778	4.3.1.1.EA1	-	-	near_cyaA	catA1 dfrA7 strA strB sul1 sul2 blaTEM-1	-	25	S	6	R	32	S	29	S	28	S	29	I	18	I	22	S	6	R	6	R
MB2871	2016-10-03	Blood	Mbagathi hospital	Imara Daima	No	3 yrs. 10 mo.	M	Case	Salmonella Typhi	S. Typhi	Included in H58 phylogeny	24276_3_146	ERR3332777	4.3.1.1.EA1	-	-	near_cyaA	catA1 dfrA7 strA strB sul1 sul2 blaTEM-1	-	31	S	6	R	34	S	25	S	26	S	31	S	25	S	25	S	6	R	6	R
MB2612	2016-07-18	Stool	Mbagathi hospital	Kiambichi	No	6 yrs. 6 mo.	M	Case	E. coli spp+ Salmonella Typhi	S. Typhi	Included in H58 phylogeny	24276_3_143	ERR3332776	4.3.1.2.EA2	Yes	6	-	catA1 dfrA7 strA strB sul1 sul2 blaTEM-1 tetB	gyrB-S464F	27	S	6	R	32	S	29	S	20	I	29	I	18	I	22	S	26	S	24	S
MB2595	2016-07-11	Stool	Mbagathi hospital	Kibera	No	3 yrs. 8 mo.	M	Control	Klebsiella spp + Salmonella Typhi	S. Typhi	Included in H58 phylogeny	22306_3_253	ERR3332773	4.3.1.2.EA2	-	-	-	-	gyrB-S464F	33	S	28	S	33	S	32	S	29	S	28	I	17	I	26	S	34	S	31	S
MMM2091	2014-09-22	Stool	Njenga	Wapewape	Yes	1 yrs. 6 mo.	F	Control	E. coli spp + Salmonella Typhi	S. Typhi	Included in H58 phylogeny	22306_3_248	ERR3332770	4.3.1.2.EA2	Yes	Untypeable	-	catA1 dfrA7 strA strB sul1 sul2 blaTEM-1 tetB	gyrB-S464F	29	S	27	S	32	S	29	S	29	S	31	S	23	S	24	S	6	R	6	R
MMM2077	2014-09-15	Stool	Njenga	Sisal	Yes	2 yrs. 6 mo.	M	Case	E. coli spp + Salmonella Typhi	S. Typhi	Included in H58 phylogeny	22306_3_247	ERR3332769	4.3.1.1.EA1	Yes	6	-	catA1 dfrA7 strA strB sul1 sul2 blaTEM-1 tetB	-	30	S	6	R	30	S	30	S	28	S	32	S	25	S	6	R	6	R	6	R
MR4433	2016-06-29	Stool	Ruben	Rurii	Yes	10 yrs. 6 mo.	M	Case	Salmonella Typhi	Enterobacter spp.	Non-Typhi organism detected	22306_3_246	ERR3332768	-	-	-	-	-	-	25	S	6	R	27	S	26	S	20	I	33	S	21	S	20	S	27	S	23	S
MR4474	2016-07-13	Stool	Ruben	Kingstone	Yes	9 yrs.	M	Case	Salmonella Typhi	S. Typhi	Included in H58 phylogeny	22306_3_244	ERR3332766	4.3.1.2.EA3	-	-	near_cyaA	catA1 dfrA7 strA strB sul2 sul1 blaTEM-1	gyrA-S83Y	29	S	11	R	33	S	31	S	28	S	25	I	6	R	27	S	6	R	6	R
MR4454	2016-07-11	Stool	Ruben	Railway	Yes	4 yrs. 7 mo.	M	Case	Citrobacter spp + Salmonella Typhi	Enterobacter spp.	Non-Typhi organism detected	22306_3_243	ERR3332765	-	-	-	-	-	-	26	S	21	S	32	S	31	S	29	S	31	S	23	S	12	I	30	S	24	S
MMM1980	2014-08-25	Stool	Njenga	Sisal	Yes	6 yrs. 6 mo.	M	Control	Salmonella Typhi	S. Typhi	Included	22306_3_236	ERR3332762	3.0.0	-	-	-	-	-	34	S	32	S	32	S	34	S	30	S	32	S	26	S	27	S	30	S	32	S
MMM2061	2014-09-11	Stool	Njenga	Pipeline	Yes	5 yrs.	F	Control	Salmonella Typhi	E. coli	Non-Typhi organism detected	22306_3_229	ERR3332759	-	-	-	-	-	-	31	S	6	R	33	S	33	S	28	S	37	S	28	S	6	R	32	S	6	R
MR2140	2014-09-08	Stool	Ruben	Pipeline	Yes	6 yrs.	M	Control	Salmonella Typhi	S. Typhi	Included in H58 phylogeny	22306_3_228	ERR3332758	4.3.1.2.EA2	Yes	6	-	catA1 dfrA7 strA strB sul1 sul2 blaTEM-1 tetB	gyrB-S464F	28	S	6	R	33	S	30	S	30	S	27	I	18	I	6	R	6	R	6	R
MR1087	2014-03-10	Stool	Ruben	Pipeline	Yes	1 yrs. 4 mo.	M	Control	Salmonella Typhi	S. Typhi	Included in H58 phylogeny	22306_3_225	ERR3332755	4.3.1.1.EA1	Yes	6	-	catA1 dfrA7 strA strB sul1 sul2 blaTEM-1 tetB	-	30	S	6	R	31	S	34	S	31	S	35	S	28	S	6	R	6	R	11	R
MCC408	2014-05-26	Stool	City council	AA/MCC	Yes	1 yrs.	M	Case	Salmonella Typhi	Providencia spp.	Non-Typhi organism detected	22306_3_221	ERR3332753	-	-	-	-	-	-	28	S	14	I	30	S	30	S	23	S	33	S	24	S	23	S	27	S	16	I
MR422	2013-11-05	Stool	Ruben	Rurii	Yes	3 mo.	M	Case	Salmonella Typhi	S. Haifa ST49	Non-Typhi organism detected	22306_3_220	ERR3332752	-	-	-	-	-	-	29	S	26	S	29	S	30	S	28	S	32	S	25	S	22	S	29	S	24	S
MR2873	2015-03-12	Stool	Ruben	Riara	Yes	14 yrs. 3 mo.	M	Control	E. coli spp+ Salmonella Typhi	S. Typhi	Included in H58 phylogeny	22306_3_218	ERR3332750	4.3.1.1.EA1	Yes	6	-	catA1 dfrA7 strA strB sul1 sul2 blaTEM-1 tetB	-	29	S	6	R	31	S	34	S	30	S	37	S	27	S	6	R	8	R	6	R
MMM1822	2014-07-21	Blood	Njenga	Vietnam	Yes	3 yrs. 7 mo.	F	Case	Salmonella Typhi	S. Typhi	Included in H58 phylogeny	22306_3_207	ERR3332746	4.3.1.1.EA1	Yes	6	-	catA1 dfrA7 strA strB sul1 sul2 blaTEM-1 tetB	gyrA-D87G	25	S	8	R	29	S	27	S	27	S	27	I	10	R	6	R	6	R	12	R
MMM183	2013-09-03	Stool	Njenga	Tassia	No	4 yrs. 8 mo.	F	Control	E. coli spp + Salmonella Typhi	S. Typhi	Included in H58 phylogeny	22306_3_206	ERR3332745	4.3.1.1.EA1	Yes	6	-	catA1 dfrA7 strA strB sul1 sul2 blaTEM-1 tetB	-	31	S	6	R	34	S	32	S	28	S	33	S	27	S	6	R	6	R	6	R
MMM281	2013-09-23	Stool	Njenga	Pipeline	Yes	7 yrs.	M	Control	E. coli spp + Salmonella Typhi	S. Typhi	Included in H58 phylogeny	22306_3_205	ERR3332744	4.3.1.1.EA1	Yes	6	-	catA1 dfrA7 strA strB sul1 sul2 blaTEM-1 tetB	-	17	R	6	R	34	S	35	S	30	S	32	S	27	S	6	R	6	R	6	R
MMM932	2014-03-05	Blood	Njenga	Motomoto	Yes	8 yrs.	M	Case	Salmonella Typhi	S. Typhi	Included in H58 phylogeny	22306_3_204	ERR3332743	4.3.1.2.EA2	-	-	-	-	gyrB-S464F	30	S	6	R	32	S	31	S	23	S	34	S	25	S	23	S	31	S	19	S
MMM190	2013-09-04	Stool	Njenga	Muradi	Yes	1 yrs. 3 mo.	F	Control	Klebsiella spp + Salmonella Typhi	S. Enteritidis ST11	Non-Typhi organism detected	22306_3_202	ERR3332742	-	-	-	-	-	-	29	S	6	R	33	S	30	S	29	S	35	S	25	S	6	R	6	R	6	R
MMM119	2013-08-21	Stool	Njenga	Sisal	Yes	5 yrs.4 mo.	M	Control	E. coli spp + Salmonella Typhi	Enterobacter spp.	Non-Typhi organism detected	22306_3_201	ERR3332741	-	-	-	-	-	-	26	S	6	R	29	S	28	S	21	S	32	S	23	S	21	S	29	S	22	S
MMM1538	2014-05-26	Stool	Njenga	Pipeline	Yes	2 yrs.	F	Control	Salmonella Typhi	S. Typhi	Included in H58 phylogeny	22306_3_200	ERR3332740	4.3.1.2.EA2	-	-	-	-	gyrB-S464F	28	S	26	S	32	S	33	S	30	S	35	S	25	S	24	S	30	S	22	S
MMM2007	2014-09-01	Stool	Njenga	Riara	Yes	1 yrs. 8 mo.	M	Case	Salmonella Typhi	S. Typhi	Included in H58 phylogeny	22306_3_197	ERR3332737	4.3.1.1.EA1	Yes	6	-	catA1 dfrA7 strA strB sul1 sul2 blaTEM-1 tetB	-	28	S	25	S	34	S	34	S	28	S	36	S	25	S	25	S	30	S	6	R
MR1749	2014-06-26	Stool	Ruben	Kitengela	No	5 yrs. 10 mo.	F	Control	Salmonella Typhi	S. Enteritidis ST11	Non-Typhi organism detected	22306_3_193	ERR3332733	-	-	-	-	-	-	26	S	7	R	28	S	30	S	24	S	27	I	6	R	22	S	6	R	24	S
MMM1707	2014-06-24	Stool	Njenga	Quarry	Yes	3 yrs. 3 mo.	F	Control	Salmonella Typhi	S. Braenderup ST2099	Non-Typhi organism detected	22306_3_192	ERR3332732	-	-	-	-	-	-	34	S	30	S	40	S	38	S	34	S	40	S	28	S	27	S	36	S	20	S
MR692	2013-12-07	Blood	Ruben	-	No	1 yrs. 4 mo.	M	Case	S. aureus + Salmonella Typhi	S. Typhi	Included in H58 phylogeny	22306_3_191	ERR3332731	4.3.1.2.EA2	Yes	6	-	catA1 dfrA7 strA strB sul1 sul2 blaTEM-1	gyrB-S464F	28	S	25	S	30	S	31	S	28	S	33	S	25	S	26	S	30	S	23	S
MCC210	2014-04-03	Blood	City council	Wapewape	Yes	2 yrs. 4 mo.	F	Case	Salmonella Typhi	S. Typhi	Included in H58 phylogeny	22306_3_188	ERR3332729	4.3.1.2.EA2	Yes	Untypeable	-	catA1 dfrA7 strA strB sul1 sul2 blaTEM-1 tetB	gyrB-S464F	30	S	6	R	32	S	34	S	30	S	27	I	16	I	6	R	6	R	6	R
MMM945	2014-03-05	Stool	Njenga	Quarry	Yes	1 yrs.	F	Control	E. coli spp + Salmonella Typhi	S. Typhi	Included in H58 phylogeny	22306_3_185	ERR3332727	4.3.1.2.EA2	Yes	6	-	catA1 dfrA7 strA strB sul1 sul2 blaTEM-1 tetB	gyrB-S464F	31	S	6	R	33	S	31	S	31	S	31	S	22	S	6	R	6	R	10	R
MCC490	2014-06-16	Stool	City council	Pipeline	Yes	9 mo.	M	Case	Citrobacter spp + Salmonella Typhi	S. Typhi	Included in H58 phylogeny	22306_3_184	ERR3332726	4.3.1.1.EA1	Yes	6	-	catA1 dfrA7 strA strB sul1 sul2 blaTEM-1 tetB	-	28	S	6	R	35	S	33	S	28	S	33	S	25	S	6	R	6	R	6	R
MR1466	2014-05-12	Stool	Ruben	Riara	Yes	8 mo.	M	Case	Salmonella Typhi	S. Typhimurium ST313	Non-Typhi organism detected	22306_3_182	ERR3332724	-	-	-	-	-	-	27	S	6	R	29	S	31	S	22	S	30	S	19	S	24	S	6	R	23	S
MR1688	2014-06-19	Stool	Ruben	Falcon	Yes	4 yrs. 11 mo.	M	Case	Salmonella Typhi	S. Enteritidis ST11	Non-Typhi organism detected	22306_3_180	ERR3332722	-	-	-	-	-	-	29	S	6	R	32	S	31	S	28	S	31	S	26	S	6	R	6	R	6	R
MMM929	2014-03-04	Stool	Njenga	Motomoto	Yes	5 yrs. 3 mo.	M	Control	E. coli spp + Salmonella Typhi	S. Typhimurium ST19	Non-Typhi organism detected	22306_3_179	ERR3332721	-	-	-	-	-	-	26	S	20	S	30	S	30	S	29	S	32	S	24	S	20	S	29	S	20	S
MMM186	2013-09-04	Stool	Njenga	Vietnam	Yes	6 yrs. 6 mo.	M	Case	Klebsiella spp + Salmonella Typhi	S. Typhi	Included in H58 phylogeny	22306_3_177	ERR3332719	4.3.1.2.EA2	Yes	6	-	catA1 dfrA7 strA strB sul1 sul2 blaTEM-1 tetB	gyrB-S464F	28	S	6	R	30	S	30	S	27	S	25	I	18	I	6	R	6	R	6	R
MCC538	2014-06-24	Stool	City council	Wapewape	Yes	3 yrs. 10 mo.	M	Control	E. coli spp+ Salmonella Typhi	S. Enteritidis ST11	Non-Typhi organism detected	22306_3_175	ERR3332717	-	-	-	-	-	-	29	S	24	S	31	S	31	S	28	S	33	S	25	S	25	S	27	S	20	S
MR83	2013-08-12	Stool	Ruben	-	-	10 mo.	F	Control	Salmonella typhimurium	S. Typhi	Included	22306_3_174	ERR3332716	4.3.1.2.EA2	Yes	untypeable	-	catA1 dfrA7 strA strB sul2 sul1 blaTEM-1 tetB	gyrB-S464F	27	S	24	S	28	S	28	S	26	S	32	S	23	S	23	S	28	S	20	S
MMM2017	2014-09-01	Stool	Njenga	AA/MCC	Yes	1 yrs. 11 mo.	M	Control	Citrobacter spp + Salmonella Typhi	S. Typhi	Included	22306_3_171	ERR3332715	2.2.2	-	-	-	-	-	28	S	6	R	35	S	34	S	32	S	36	S	29	S	26	S	32	S	32	S
MR4104	2016-03-16	Stool	Ruben	Simbacool	Yes	5 mo.	F	Case	Klebsiella spp + Salmonella Typhi	Enterobacter spp.	Non-Typhi organism detected	22306_3_167	ERR3332711	-	-	-	-	-	-	29	S	16	I	30	S	30	S	20	I	30	S	16	I	6	R	27	S	19	S
MMM3664	2015-07-23	Blood	Njenga	Quarry	Yes	3 yrs. 1 mo.	M	Case	Salmonella Typhi	S. Typhi	Included in H58 phylogeny	22306_3_164	ERR3332709	4.3.1.2.EA2	Yes	6	-	catA1 dfrA7 strA strB sul1 sul2 blaTEM-1 tetB	gyrB-S464F	30	S	6	R	34	S	32	S	32	S	26	I	14	I	6	R	15	I	6	R
MB1219	2015-07-28	Stool	Mbagathi hospital	Kariobangi	No	3 yrs. 1 mo.	F	Case	Salmonella Typhi	S. Typhimurium ST313	Non-Typhi organism detected	22306_3_162	ERR3332708	-	-	-	-	-	-	32	S	6	R	36	S	34	S	33	S	33	S	23	S	6	R	6	R	6	R
MCC1422	2015-07-16	Stool	City council	Motomoto	Yes	1 yrs. 5 mo.	F	Control	Salmonella Typhi	S. Enteritidis ST11	Non-Typhi organism detected	22306_3_160	ERR3332706	-	-	-	-	-	-	28	S	6	R	34	S	33	S	28	S	37	S	25	S	6	R	6	R	6	R
MB2256	2016-03-29	Stool	Mbagathi hospital	Kiserian	No	3 yrs. 11 mo.	M	Case	Salmonella Typhi	S. Typhimurium ST313	Non-Typhi organism detected	22306_3_157	ERR3332703	-	-	-	-	-	-	27	S	6	R	28	S	27	S	28	S	33	S	24	S	24	S	28	S	25	S
MB1091	2015-07-08	Stool	Mbagathi hospital	Rongai	No	7 yrs. 4 mo.	F	Control	E. coli spp+ Klebsiella spp + Salmonella Typhi	S. Typhi	Included in H58 phylogeny	22306_3_155	ERR3332701	4.3.1.1.EA1	Yes	6	-	catA1 dfrA7 strA strB sul1 sul2 blaTEM-1 tetB	-	29	S	6	R	34	S	32	S	28	S	34	S	26	S	6	R	6	R	6	R
MMM4927	2016-05-03	Blood	Njenga	Quarry	Yes	3 yrs. 11 mo.	M	Case	Salmonella Typhi	S. Typhi	Included in H58 phylogeny	22306_3_147	ERR3332694	4.3.1.1.EA1	-	-	-	-	gyrA-S83F	29	S	25	S	32	S	30	S	29	S	28	I	6	R	30	S	26	S	24	S
MB2179	2016-03-14	Stool	Mbagathi hospital	Kibera	No	3 yrs. 8 mo.	M	Case	Klebsiella spp + Salmonella Typhi	S. Enteritidis ST11	Non-Typhi organism detected	22306_3_145	ERR3332693	-	-	-	-	-	-	26	S	22	S	27	S	28	S	26	S	31	S	24	S	24	S	28	S	20	S
MMM3516	2015-07-02	Stool	Njenga	Vietnam	Yes	1 yrs. 11 mo.	F	Case	E. coli spp	S. Typhi	Included in H58 phylogeny	22306_3_140	ERR3332691	4.3.1.2.EA2	Yes	6	-	catA1 dfrA7 strA strB sul1 sul2 blaTEM-1 tetB	gyrB-S464F	27	S	6	R	31	S	31	S	28	S	25	I	14	I	6	R	6	R	6	R
MMM3517	2015-07-03	Blood	Njenga	48	Yes	2 yrs. 4 mo.	M	Case	Salmonella Typhi	S. Typhi	Included in H58 phylogeny	22306_3_138	ERR3332690	4.3.1.2.EA2	Yes	6	-	catA1 dfrA7 strA strB sul1 sul2 blaTEM-1 tetB	gyrB-S464F	34	S	6	R	31	S	35	S	31	S	32	S	23	S	6	R	6	R	6	R
MB2257	2016-03-29	Blood	Mbagathi hospital	Gikomba	No	3 yrs. 7 mo.	M	Case	Salmonella Typhi	S. Enteritidis ST11	Non-Typhi organism detected	22306_3_134	ERR3332689	-	-	-	-	-	-	28	S	6	R	32	S	30	S	29	S	34	S	25	S	6	R	6	R	6	R
MR4345	2016-06-13	Stool	Ruben	Kosovo	Yes	11 yrs. 10 mo.	M	Case	Klebsiella spp + E. coli spp+ Salmonella Typhi	S. Typhi	Included in H58 phylogeny	22306_3_129	ERR3332685	4.3.1.2.EA3	-	-	near_cyaA	catA1 dfrA7 strA strB sul2 sul1 blaTEM-1	gyrA-S83Y	30	S	13	R	30	S	30	S	30	S	26	I	6	R	28	S	6	R	6	R
MR1916	2014-07-23	Stool	Ruben	Railway	Yes	1 yrs. 8 mo.	F	Case	Salmonella Typhi	S. Typhi	Included in H58 phylogeny	22306_3_126	ERR3332684	4.3.1.2.EA3	-	-	near_cyaA	catA1 dfrA7 strA strB sul2 sul1 blaTEM-1	gyrA-S83Y	29	S	10	R	33	S	30	S	29	S	27	I	6	R	26	S	6	R	6	R
MR4157	2016-04-04	Stool	Ruben	Feed the children	Yes	1 yrs. 2 mo.	F	Control	Klebsiella spp + Salmonella Typhi	S. Typhimurium ST313	Non-Typhi organism detected	22306_3_124	ERR3332682	-	-	-	-	-	-	17	R	6	R	34	S	33	S	28	S	26	I	16	I	6	R	6	R	6	R
MCC2769	2016-06-07	Stool	City council	Quarry	Yes	1 yrs. 1 mo.	M	Control	Citrobacter spp + Salmonella Typhi	S. Typhi	Included in H58 phylogeny	22306_3_116	ERR3332677	4.3.1.1.EA1	Yes	6	-	catA1 dfrA7 strA strB sul1 sul2 blaTEM-1 tetB	-	28	S	6	R	32	S	30	S	32	S	31	S	21	S	6	R	6	R	6	R
MB2464	2016-06-02	Stool	Mbagathi hospital	Kibera	No	10 yrs. 7 mo.	M	Control	Salmonella Typhi	S. Typhi	Included in H58 phylogeny	22306_3_115	ERR3332676	4.3.1.1.EA1	-	-	near_cyaA	catA1 dfrA7 strA strB sul1 sul2 blaTEM-1	-	27	S	6	R	33	S	30	S	28	S	28	I	18	I	24	S	6	R	10	R
MMM3507	2015-07-02	Blood	Njenga	Motomoto	Yes	2 yrs. 1 mo.	M	Case	Salmonella Typhi	S. Enteritidis ST11	Non-Typhi organism detected	22306_3_114	ERR3332675	-	-	-	-	-	-	25	S	6	R	28	S	27	S	23	S	27	I	17	I	6	R	6	R	6	R
MMM3483	2015-06-29	Stool	Njenga	AA/MCC	Yes	12 yrs. 3 mo.	F	Control	Salmonella Typhi	S. Enteritidis ST11	Non-Typhi organism detected	22306_3_113	ERR3332674	-	-	-	-	-	-	26	S	21	S	27	S	28	S	24	S	29	I	16	I	22	S	27	S	18	S
MCC1378	2015-07-03	Stool	City council	48	Yes	2 yrs. 8 mo.	M	Case	Salmonella Typhi	S. Braenderup ST22	Non-Typhi organism detected	22306_3_110	ERR3332671	-	-	-	-	-	-	26	S	6	R	31	S	31	S	30	S	25	I	18	I	6	R	6	R	6	R
MB1096	2015-07-08	Stool	Mbagathi hospital	Athi river	No	9 yrs.	M	Case	Citrobacter spp + Salmonella Typhi	S. Typhi	Included in H58 phylogeny	22306_3_108	ERR3332669	4.3.1.2.EA2	Yes	6	-	catA1 dfrA7 strA strB sul1 sul2 blaTEM-1 tetB	gyrB-S464F	27	S	6	R	32	S	31	S	30	S	31	S	23	S	6	R	6	R	6	R
MMM3472	2015-06-29	Blood	Njenga	Quarry	Yes	3 yrs.	M	Case	Salmonella Typhi	S. Braenderup ST22	Non-Typhi organism detected	22306_3_98	ERR3332664	-	-	-	-	-	-	15	R	13	R	20	R	17	R	20	I	31	S	19	S	23	S	24	S	27	S
MMM652	2014-02-04	Stool	Njenga	Plot 10	No	2 yrs. 6 mo.	M	Control	Proteus spp	S. Typhi	Included in H58 phylogeny	22306_3_96	ERR3332662	4.3.1.2.EA2	Yes	6	-	catA1 dfrA7 strA strB sul1 sul2 blaTEM-1 tetB	gyrB-S464F	28	S	6	R	33	S	30	S	29	S	33	S	21	S	6	R	6	R	10	R
MCC1904	2016-01-11	Blood	City council	48	Yes	10 yrs. 5 mo.	M	Case	Salmonella Typhi	S. Typhi	Included in H58 phylogeny	22306_3_93	ERR3332660	4.3.1.2.EA2	-	-	-	-	gyrB-S464F	26	S	6	R	22	R	28	S	21	S	33	S	22	S	26	S	6	R	25	S
MCC1752	2015-11-02	Stool	City council	Motomoto	Yes	1 yrs. 4 mo.	M	Control	Salmonella Typhi	S. Typhi	Included in H58 phylogeny	22306_3_92	ERR3332659	4.3.1.2.EA2	Yes	6	-	catA1 dfrA7 strA strB sul1 sul2 blaTEM-1 tetB	gyrB-S464F	27	S	6	R	34	S	30	S	30	S	32	S	22	S	6	R	6	R	6	R
MMM515	2013-11-22	Blood	Njenga	Wapewape	Yes	6 yrs.	M	Case	Salmonella Typhi	S. Heidelberg ST15	Non-Typhi organism detected	22306_3_90	ERR3332657	-	-	-	-	-	-	28	S	6	R	34	S	32	S	30	S	32	S	26	S	6	R	6	R	6	R
MCC327	2014-04-28	Stool	City council	AA/MCC	Yes	5 yrs. 8 mo.	M	Control	Klebsiella spp + Salmonella Typhi	S. Braenderup ST22	Non-Typhi organism detected	22306_3_89	ERR3332656	-	-	-	-	-	-	27	S	6	R	32	S	31	S	28	S	36	S	27	S	6	R	6	R	6	R
MB1832	2016-01-13	Blood	Mbagathi hospital	Kayole	No	6 yrs. 9 mo.	M	Case	Salmonella Typhi	S. Typhi	Included	22306_3_88	ERR3332655	4.3.1.2.EA2	-	-	-	-	gyrB-S464F	30	S	28	S	36	S	34	S	32	S	33	S	24	S	28	S	34	S	20	S
MCC1582	2015-09-03	Blood	City council	Motomoto	Yes	3 yrs. 11 mo.	F	Case	Salmonella Typhi	S. Typhi	Included	22306_3_86	ERR3332653	4.3.1.2.EA2	-	-	-	-	gyrB-S464F	27	S	6	R	28	S	30	S	30	S	28	I	17	I	26	S	6	R	6	R
MCC17	2014-03-06	Stool	City council	Quarry	Yes	2 yrs. 3 mo.	M	Case	Klebsiella spp + Salmonella Typhi	S. Typhi	Included in H58 phylogeny	22306_3_85	ERR3332652	4.3.1.2.EA2	Yes	6	-	catA1 dfrA7 strA strB sul1 sul2 blaTEM-1 tetB	gyrB-S464F	30	S	6	R	30	S	29	S	30	S	33	S	22	S	6	R	6	R	6	R
MR304	2013-09-30	Stool	Ruben	Kosovo	Yes	7 yrs.	M	Control	Salmonella Typhi	S. Typhi	Included in H58 phylogeny	22306_3_75	ERR3332648	4.3.1.2.EA2	-	-	-	-	gyrB-S464F	27	S	27	S	32	S	30	S	28	S	27	I	16	I	25	S	31	S	27	S
MB1970	2016-02-09	Stool	Mbagathi hospital	Kibera	No	9 yrs. 4 mo.	F	Control	Citrobacter spp + Salmonella Typhi	S. Enteritidis ST11	Non-Typhi organism detected	22306_3_73	ERR3332647	-	-	-	-	-	-	27	S	25	S	31	S	30	S	28	S	33	S	25	S	24	S	33	S	6	R
MR1806	2014-07-03	Stool	Ruben	Rurii	Yes	11 yrs. 4 mo.	M	Control	Salmonella Typhi	S. Typhi	Included in H58 phylogeny	22306_3_68	ERR3332643	4.3.1.1.EA1	-	-	-	-	-	31	S	30	S	34	S	34	S	30	S	34	S	26	S	27	S	32	S	20	S
MMM1784	2014-07-09	Stool	Njenga	Quarry	Yes	4 yrs.	F	Control	Salmonella Typhi	S. Typhi	Included in H58 phylogeny	22306_3_67	ERR3332642	4.3.1.2.EA2	Yes	6	-	catA1 dfrA7 strA strB sul1 sul2 blaTEM-1 tetB	gyrB-S464F	34	S	6	R	38	S	38	S	32	S	32	S	24	S	9	R	6	R	6	R
MMM736	2014-02-13	Blood	Njenga	Tassia	No	7 yrs.	M	Case	Salmonella Typhi	S. Typhi	Included in H58 phylogeny	22306_3_66	ERR3332641	4.3.1.1.EA1	-	-	-	-	-	30	S	30	S	33	S	33	S	30	S	33	S	26	S	26	S	32	S	24	S
MR400	2013-10-29	Blood	Ruben	-	-	2 yrs. 11 mo.	M	Case	Salmonella Typhi	S. Enteritidis ST11	Non-Typhi organism detected	22306_3_65	ERR3332640	-	-	-	-	-	-	28	S	6	R	25	I	32	S	23	S	35	S	24	S	23	S	6	R	29	S
MMM1726	2014-06-24	Stool	Njenga	Motomoto	Yes	8 yrs. 6 mo.	M	Control	Klebsiella spp + Salmonella Typhi	S. Typhi	Included	22306_3_58	ERR3332636	2.5.0	-	-	-	-	-	30	S	25	S	34	S	32	S	30	S	34	S	25	S	24	S	34	S	26	S
MB56	2014-10-10	Blood	Mbagathi hospital	Phase 5	No	10 yrs.	M	Case	Salmonella Typhi	S. Typhi	Included in H58 phylogeny	22306_3_57	ERR3332635	4.3.1.2.EA3	-	-	near_cyaA	catA1 dfrA7 strA strB sul2 sul1 blaTEM-1	gyrA-S83Y	32	S	6	R	36	S	34	S	30	S	26	I	6	R	28	S	6	R	6	R
MMM182	2013-09-03	Stool	Njenga	Vietnam	Yes	6 yrs.	F	Control	Salmonella Typhi	S. Typhi	Included in H58 phylogeny	22306_3_56	ERR3332634	4.3.1.1.EA1	Yes	6	-	catA1 dfrA7 strA strB sul1 sul2 blaTEM-1 tetB	-	23	S	6	R	35	S	34	S	31	S	33	S	27	S	6	R	6	R	6	R
MR1644	2014-06-11	Stool	Ruben	Rurii	Yes	2 yrs. 6 mo.	F	Case	Salmonella typhimurium	S. Typhi	Included in H58 phylogeny	22306_3_55	ERR3332633	4.3.1.1.EA1	Yes	6	-	catA1 dfrA7 strA strB sul1 sul2 blaTEM-1 tetB	-	30	S	26	S	36	S	34	S	30	S	34	S	27	S	6	R	6	R	23	S
MCC819	2014-08-27	Stool	City council	Wapewape	Yes	1 yrs. 4 mo.	F	Control	E. coli spp+ Salmonella Typhi	S. Typhimurium ST19	Non-Typhi organism detected	22306_3_54	ERR3332632	-	-	-	-	-	-	26	S	26	S	29	S	29	S	28	S	36	S	23	S	24	S	28	S	20	S
MCC823	2014-09-01	Stool	City council	Motomoto	Yes	1 yrs. 3 mo.	F	Control	Salmonella Typhi	E. coli	Non-Typhi organism detected	22306_3_47	ERR3332628	-	-	-	-	-	-	19	I	6	R	32	S	31	S	25	S	25	I	6	R	6	R	6	R	20	S
MR274	2013-09-26	Stool	Ruben	Rurii	Yes	13 yrs. 2 mo.	F	Control	E. coli spp+ Salmonella Typhi	S. Typhi	Included in H58 phylogeny	22306_3_38	ERR3332623	4.3.1.1.EA1	Yes	6	-	catA1 dfrA7 strA strB sul1 sul2 blaTEM-1 tetB	-	30	S	6	R	40	S	36	S	30	S	26	I	6	R	28	S	6	R	6	R
MB2304	2016-04-11	Stool	Mbagathi hospital	Ruai	No	4 yrs. 8 mo.	F	Control	Salmonella Typhi	S. Typhimurium ST313	Non-Typhi organism detected	22306_3_31	ERR3332619	-	-	-	-	-	-	27	S	6	R	30	S	28	S	27	S	31	S	24	S	22	S	6	R	25	S
MB1296	2015-08-11	Blood	Mbagathi hospital	Ruai	No	4 yrs. 2 mo.	M	Case	Salmonella Typhi	S. Typhi	Included in H58 phylogeny	22306_3_27	ERR3332617	4.3.1.2.EA3	-	-	near_cyaA	catA1 dfrA7 strA strB sul2 sul1 blaTEM-1	gyrA-S83Y	33	S	6	R	33	S	32	S	29	S	26	I	6	R	27	S	6	R	6	R
MB2241	2016-03-22	Stool	Mbagathi hospital	South B	No	12 yrs. 6 mo.	M	Control	Proteus spp + Salmonella Typhi	S. Typhi	Included	22306_3_12	ERR3332605	4.1.1	-	-	-	-	-	29	S	26	S	32	S	29	S	30	S	33	S	26	S	28	S	29	S	22	S
MB1570	2015-10-01	Blood	Mbagathi hospital	Dandora	No	10 yrs. 7 mo.	M	Case	Salmonella Typhi	S. Enteritidis ST11	Non-Typhi organism detected	22306_3_9	ERR3332603	-	-	-	-	-	-	29	S	6	R	32	S	32	S	28	S	33	S	24	S	6	R	6	R	6	R
MMM3530	2015-07-06	Stool	Njenga	Wapewape	Yes	5 yrs.	F	Control	Salmonella Typhi	Salmonella spp.	Non-Typhi organism detected	22306_3_6	ERR3332602	-	-	-	-	-	-	27	S	6	R	29	S	27	S	23	S	27	I	17	I	23	S	22	S	21	S
MCC2442	2016-03-17	Stool	City council	Imara Daima	No	4 yrs. 6 mo.	F	Control	Salmonella Typhi	S. Enteritidis ST11	Non-Typhi organism detected	22306_3_3	ERR3332601	-	-	-	-	-	-	28	S	15	I	24	I	32	S	27	S	31	S	25	S	26	S	29	S	21	S
MR766	2014-01-16	Blood	Ruben	Rurii	Yes	7 yrs.	M	Case	Salmonella Typhi	S. Typhi	Included in H58 phylogeny	22204_7_274	ERR3332596	4.3.1.1.EA1	-	-	-	-	-	29	S	29	S	36	S	30	S	30	S	34	S	26	S	27	S	34	S	29	S
MMM5295	2016-07-05	Stool	Njenga	Tassia	No	1 yrs. 4 mo.	M	Control	Pseudomonas spp + Salmonella Typhi	Proteus spp.	Non-Typhi organism detected	22204_7_269	ERR3332594	-	-	-	-	-	-	29	S	16	I	32	S	32	S	29	S	38	S	25	S	25	S	25	S	25	S
MMM5285	2016-07-05	Stool	Njenga	Riara	Yes	1 yrs. 6 mo.	M	Control	Proteus spp + Salmonella Typhi	S. Typhimurium ST19	Non-Typhi organism detected	22204_7_268	ERR3332593	-	-	-	-	-	-	25	S	23	S	29	S	29	S	24	S	34	S	22	S	9	R	24	S	23	S
MB345	2015-02-17	Blood	Mbagathi hospital	South B	No	6 yrs. 5 mo.	M	Case	Salmonella Typhi	S. Typhi	Included in H58 phylogeny	22204_7_258	ERR3332591	4.3.1.2.EA3	-	-	near_cyaA	catA1 dfrA7 strA strB sul2 sul1 blaTEM-1	gyrA-S83Y	32	S	9	R	34	S	33	S	30	S	27	I	6	R	24	S	6	R	20	S
MB651	2015-04-27	Stool	Mbagathi hospital	Huruma	No	7 yrs. 2 mo.	M	Case	Salmonella Typhi	S. Typhi	Included in H58 phylogeny	22204_7_256	ERR3332589	4.3.1.2.EA2	Yes	6	-	catA1 dfrA7 strA strB sul1 sul2 blaTEM-1 tetB	gyrB-S464F	29	S	6	R	33	S	30	S	30	S	26	I	18	I	6	R	6	R	6	R
MMM2746	2015-02-26	Blood	Njenga	Sisal	Yes	4 yrs. 2 mo.	F	Case	Salmonella Typhi	S. Typhi	Included in H58 phylogeny	22204_7_243	ERR3332587	4.3.1.2.EA3	-	-	near_cyaA	catA1 dfrA7 strA strB sul2 sul1 blaTEM-1	gyrA-S83Y	30	S	6	R	40	S	36	S	30	S	26	I	6	R	28	S	6	R	6	R
MCC1259	2015-06-03	Blood	City council	AA/MCC	Yes	3 yrs.	M	Case	Proteus spp + Salmonella Typhi	S. Typhi	Included in H58 phylogeny	22204_7_239	ERR3332586	4.3.1.2.EA2	Yes	6	-	catA1 dfrA7 strA strB sul1 sul2 blaTEM-1 tetB	gyrB-S464F	28	S	6	R	32	S	30	S	27	S	26	I	18	I	6	R	25	S	6	R
MCC1306	2015-06-12	Stool	City council	48	Yes	5 yrs. 4 mo.	F	Case	Salmonella Typhi	S. Typhi	Included in H58 phylogeny	22204_7_237	ERR3332585	4.3.1.2.EA2	Yes	6	-	catA1 dfrA7 strA strB sul1 sul2 blaTEM-1 tetB	gyrB-S464F	22	S	6	R	33	S	28	S	29	S	31	S	19	S	6	R	6	R	6	R
MR3122	2015-05-21	Stool	Ruben	Rurii	Yes	1 yrs. 7 mo.	F	Control	E. coli spp+ Klebsiella spp + Salmonella Typhi	S. Typhi	Included in H58 phylogeny	22204_7_232	ERR3332584	4.3.1.2.EA2	Yes	6	-	catA1 dfrA7 strA strB sul1 sul2 blaTEM-1 tetB	gyrB-S464F	23	S	6	R	33	S	33	S	28	S	26	I	17	I	6	R	6	R	6	R
MB3020	2016-11-09	Blood	Mbagathi hospital	56	No	7 yrs. 8 mo.	M	Case	Salmonella Typhi	S. Typhi	Included in H58 phylogeny	22204_7_208	ERR3332581	4.3.1.2.EA2	-	-	-	-	gyrB-S464F	31	S	29	S	32	S	33	S	28	S	30	S	20	S	27	S	34	S	27	S
MR4882	2016-11-17	Blood	Ruben	Railway	Yes	3 yrs. 2 mo.	M	Case	Salmonella Typhi	S. Typhi	Included in H58 phylogeny	22204_7_207	ERR3332580	4.3.1.2.EA3	-	-	near_cyaA	catA1 dfrA7 strA strB sul2 sul1 blaTEM-1	gyrA-S83Y	31	S	6	R	32	S	30	S	27	S	23	I	6	R	24	S	9	R	6	R
MCC3224	2016-09-26	Blood	City council	Quarry	Yes	7 yrs. 8 mo.	F	Case	Salmonella Typhi	S. Typhi	Included in H58 phylogeny	22204_7_193	ERR3332578	4.3.1.2.EA2	Yes	6	-	catA1 dfrA7 strA strB sul1 sul2 blaTEM-1 tetB	gyrB-S464F	29	S	6	R	31	S	31	S	30	S	33	S	22	S	6	R	6	R	6	R
MR4803	2016-10-25	Stool	Ruben	Railway	Yes	7 yrs. 6 mo.	M	Case	E. coli spp+ Salmonella Typhi	S. Typhi	Included in H58 phylogeny	22204_7_188	ERR3332577	4.3.1.2.EA3	-	-	near_cyaA	catA1 dfrA7 strA strB sul2 sul1 blaTEM-1	gyrA-S83Y	30	S	6	R	22	R	30	S	28	S	26	I	6	R	26	S	6	R	6	R
MB2900	2016-10-11	Blood	Mbagathi hospital	Kibra/Li-i	No	1 yrs. 10 mo.	M	Case	Salmonella Typhi	S. Typhi	Included in H58 phylogeny	22204_7_185	ERR3332576	4.3.1.1.EA1	-	-	near_cyaA	catA1 dfrA7 strA strB sul1 sul2 blaTEM-1	-	24	S	6	R	32	S	32	S	30	S	32	S	26	S	26	S	6	R	6	R
MR4747	2016-10-11	Blood	Ruben	Falcon	Yes	11 mo.	F	Case	Salmonella Typhi	S. Typhi	Included in H58 phylogeny	22204_7_184	ERR3332575	4.3.1.1.EA1	-	-	near_cyaA	catA1 dfrA7 strA strB sul1 sul2 blaTEM-1	-	29	S	6	R	33	S	32	S	28	S	34	S	26	S	27	S	6	R	6	R
MMM5825	2016-10-24	Blood	Njenga	Pipeline	Yes	2 yrs. 3 mo.	M	Case	E. coli spp + Salmonella Typhi	S. Typhi	Included in H58 phylogeny	22204_7_181	ERR3332574	4.3.1.2.EA2	-	-	-	-	gyrB-S464F	25	S	27	S	32	S	30	S	28	S	30	S	17	I	24	S	30	S	23	S
MMM5775	2016-10-13	Blood	Njenga	Pipeline	Yes	3 yrs.	M	Case	Salmonella Typhi	S. Typhi	Included in H58 phylogeny	22204_7_180	ERR3332573	4.3.1.1.EA1	-	-	near_cyaA	catA1 dfrA7 strA strB sul1 sul2 blaTEM-1	-	26	S	6	R	31	S	29	S	22	S	32	S	23	S	14	I	6	R	22	S
MB1022	2015-06-29	Stool	Mbagathi hospital	Waithaka	No	2 yrs. 9 mo.	M	Control	Klebsiella spp + Enterococcus spp + Salmonella Typhi	S. Enteritidis ST11	Non-Typhi organism detected	22204_7_171	ERR3332568	-	-	-	-	-	-	30	S	25	S	31	S	30	S	28	S	32	S	25	S	25	S	27	S	20	S
MMM466	2013-11-11	Stool	Njenga	48	Yes	3 yrs. 11 mo.	F	Control	Salmonella Typhi	S. Typhi	Included in H58 phylogeny	22204_7_161	ERR3332562	4.3.1.1.EA1	Yes	6	-	catA1 dfrA7 strA strB sul1 sul2 blaTEM-1 tetB	-	30	S	30	S	32	S	30	S	29	S	33	S	25	S	25	S	30	S	17	I
MR1919	2014-07-24	Blood	Ruben	Lungalunga	No	5 yrs. 8 mo.	M	Case	Salmonella Typhi	S. Enteritidis ST11	Non-Typhi organism detected	22204_7_152	ERR3332561	-	-	-	-	-	-	29	S	6	R	33	S	34	S	30	S	35	S	25	S	6	R	11	I	6	R
MMM158	2013-08-29	Stool	Njenga	Imara Daima	No	6 yrs.	M	Control	Proteus spp + Salmonella Typhi	S. Typhi	Included	22204_7_150	ERR3332559	4.3.1.2.EA2	Yes	6	-	catA1 dfrA7 strA strB sul2 sul1 blaTEM-1 tetB	gyrB-S464F	31	S	6	R	33	S	32	S	30	S	32	S	20	S	6	R	6	R	6	R
MB1826	2016-01-11	Stool	Mbagathi hospital	buruburu	No	8 yrs. 4 mo.	M	Control	Shigella spp + Salmonella Typhi	S. Typhi	Included	22204_7_147	ERR3332557	4.3.1.2.EA2	Yes	6	-	catA1 dfrA7 strA strB sul2 sul1 blaTEM-1 tetB	gyrB-S464F	30	S	12	R	32	S	30	S	30	S	29	I	18	I	6	R	6	R	6	R
MMM149	2013-08-29	Stool	Njenga	Wapewape	Yes	4 yrs.	F	Control	Klebsiella spp + Salmonella Typhi	S. Typhi	Included in H58 phylogeny	22204_7_146	ERR3332556	4.3.1.2.EA2	Yes	6	-	catA1 dfrA7 strA strB sul1 sul2 blaTEM-1 tetB	gyrB-S464F	28	S	6	R	34	S	32	S	28	S	27	I	15	I	6	R	6	R	6	R
MB2094	2016-03-01	Blood	Mbagathi hospital	Sisal	Yes	6 yrs. 3 mo.	F	Case	Salmonella Typhi	S. Typhi	Included in H58 phylogeny	22204_7_145	ERR3332555	4.3.1.1.EA1	-	-	near_cyaA	catA1 dfrA7 strA strB sul1 sul2 blaTEM-1	-	32	S	6	R	31	S	30	S	30	S	33	S	26	S	27	S	6	R	6	R
MCC2037	2016-01-27	Blood	City council	Vietnam	Yes	7 yrs. 1 mo.	M	Case	Salmonella Typhi	S. Enteritidis ST11	Non-Typhi organism detected	22204_7_135	ERR3332553	-	-	-	-	-	-	30	S	6	R	35	S	33	S	30	S	35	S	27	S	6	R	6	R	6	R
MB1710	2015-11-03	Stool	Mbagathi hospital	Kibera	No	2 yrs. 11 mo.	M	Control	Salmonella Typhi	Enterobacter spp.	Non-Typhi organism detected	22204_7_133	ERR3332552	-	-	-	-	-	-	25	S	6	R	27	S	28	S	20	I	31	S	22	S	21	S	27	S	14	I
MCC1165	2015-04-24	Stool	City council	AA/MCC	Yes	1 yrs. 2 mo.	M	Control	Salmonella Typhi	S. Typhi	Included in H58 phylogeny	22204_7_130	ERR3332551	4.3.1.1.EA1	Yes	6	-	catA1 dfrA7 strA strB sul1 sul2 blaTEM-1 tetB	gyrB-S464F	29	S	11	R	32	S	30	S	28	S	26	I	18	I	6	R	6	R	15	I
MB2019	2016-02-18	Stool	Mbagathi hospital	Shauri moyo	No	4 yrs.	F	Control	E. coli spp+ Salmonella Typhi	E. coli/Salmonella spp. ST3007	Non-Typhi organism detected	22204_7_123	ERR3332549	-	-	-	-	-	-	28	S	6	R	29	S	31	S	20	I	32	S	24	S	21	S	6	R	26	S
MB988	2015-06-23	Blood	Mbagathi hospital	Kibera	No	2 yrs. 1 mo.	F	Case	Salmonella Typhi	S. Typhi	Included in H58 phylogeny	22204_7_122	ERR3332548	4.3.1.1.EA1	-	-	near_cyaA	catA1 dfrA7 strA strB sul1 sul2 blaTEM-1	-	23	S	6	R	32	S	29	S	27	S	26	I	17	I	23	S	6	R	6	R
MB520	2015-03-26	Stool	Mbagathi hospital	Kawangware	No	5 yrs. 6 mo.	M	Control	Salmonella Typhi	S. Enteritidis ST11	Non-Typhi organism detected	22204_7_117	ERR3332547	-	-	-	-	-	-	24	S	13	R	25	I	27	S	25	S	32	S	20	S	6	R	6	R	18	S
MB562	2015-04-08	Stool	Mbagathi hospital	Kibera	No	11 yrs. 9 mo.	F	Control	Klebsiella spp + Salmonella Typhi	S. Typhi	Included in H58 phylogeny	22204_7_115	ERR3332546	4.3.1.2.EA2	Yes	6	-	catA1 dfrA7 strA strB sul1 sul2 blaTEM-1 tetB	gyrB-S464F	28	S	6	R	30	S	30	S	29	S	28	I	17	I	6	R	6	R	6	R
MMM3370	2015-06-11	Stool	Njenga	48	Yes	4 yrs. 6 mo.	F	Control	Salmonella Typhi	S. Typhi	Included in H58 phylogeny	22204_7_111	ERR3332545	4.3.1.2.EA2	Yes	6	-	catA1 dfrA7 strA strB sul1 sul2 blaTEM-1 tetB	gyrB-S464F	24	S	6	R	34	S	30	S	27	S	24	I	17	I	6	R	6	R	7	R
MB1807	2015-11-23	Stool	Mbagathi hospital	Kibera	No	3 yrs. 11 mo.	M	Case	Klebsiella spp + Salmonella Typhi	S. Typhi	Included in H58 phylogeny	22204_7_107	ERR3332543	4.3.1.2.EA3	-	-	near_cyaA	catA1 dfrA7 strA strB sul2 sul1 blaTEM-1	gyrA-S83Y	32	S	11	R	34	S	32	S	30	S	27	I	6	R	26	S	6	R	6	R
MB1765	2015-11-13	Blood	Mbagathi hospital	Dagoretti	No	8 yrs. 9 mo.	F	Case	Salmonella Typhi	S. Typhi	Included in H58 phylogeny	22204_7_105	ERR3332542	4.3.1.2.EA2	-	-	-	-	gyrB-S464F	26	S	26	S	28	S	27	S	28	S	31	S	22	S	29	S	25	S	23	S
MMM4189	2015-11-11	Stool	Njenga	Pipeline	Yes	1 yrs. 2 mo.	F	Control	Salmonella Typhi	S. Typhi	Included in H58 phylogeny	22204_7_104	ERR3332541	4.3.1.2.EA2	Yes	Untypeable	-	catA1 dfrA7 strA strB sul1 sul2 blaTEM-1 tetB	gyrB-S464F	30	S	10	R	26	S	30	S	29	S	32	S	23	S	10	R	6	R	6	R
MR3893	2016-02-08	Stool	Ruben	Sisal	Yes	5 mo.	F	Case	E. coli spp+ Salmonella Typhi	S. Typhi	Included in H58 phylogeny	22204_7_97	ERR3332539	4.3.1.1.EA1	-	-	-	-	gyrA-S83Y	27	S	27	S	30	S	30	S	28	S	21	I	6	R	24	S	29	S	27	S
MR610	2013-11-27	Blood	Ruben	-	No	3 yrs.	M	Case	Salmonella Typhi	S. Typhi	Included in H58 phylogeny	24276_3_278	ERR2909612	4.3.1.2.EA2	Yes	6	-	catA1 dfrA7 strA strB sul1 sul2 blaTEM-1 tetB	gyrB-S464F	28	S	6	R	32	S	30	S	27	S	25	I	18	I	6	R	6	R	6	R
MR542	2013-11-21	Stool	Ruben	Pipeline	Yes	13 yrs. 9 mo.	F	Control	Salmonella Typhi	S. Typhi	Included in H58 phylogeny	24276_3_277	ERR2909611	4.3.1.1.EA1	Yes	6	-	catA1 dfrA7 strA strB sul1 sul2 blaTEM-1 tetB	-	28	S	6	R	22	R	26	S	18	I	21	I	17	I	6	R	6	R	6	R
MR4065	2016-03-09	Stool	Ruben	Kosovo	Yes	9 yrs. 11 mo.	F	Case	Klebsiella spp + Salmonella Typhi	S. Typhi	Included in H58 phylogeny	24276_3_272	ERR2909608	4.3.1.2.EA2	-	-	-	-	gyrB-S464F	30	S	24	S	33	S	30	S	28	S	26	I	18	I	26	S	31	S	28	S
MR3744	2015-10-07	Stool	Ruben	Gatoto	Yes	3 yrs. 6 mo.	F	Control	Pseudomonas spp + Enterobacter clocea + Salmonella Typhi	S. Haifa ST49	Non-Typhi organism detected	24276_3_262	ERR2909598	-	-	-	-	-	-	29	S	26	S	28	S	32	S	28	S	34	S	26	S	22	S	29	S	27	S
MR3183	2015-06-03	Blood	Ruben	Rurii	Yes	11 mo.	M	Case	Salmonella Typhi	S. Typhi	Included in H58 phylogeny	24276_3_256	ERR2909592	4.3.1.1.EA1	Yes	6	-	catA1 dfrA7 strA strB sul1 sul2 blaTEM-1 tetB	-	27	S	6	R	30	S	28	S	30	S	32	S	22	S	6	R	6	R	20	S
MR2826	2015-03-05	Stool	Ruben	Feed the children	Yes	1 yrs.	F	Control	Citrobacter spp + Salmonella Typhi	S. Typhimurium ST19	Non-Typhi organism detected	24276_3_251	ERR2909587	-	-	-	-	-	-	26	S	24	S	30	S	28	S	27	S	32	S	24	S	24	S	28	S	23	S
MR253	2013-09-23	Stool	Ruben	Ruben	Yes	4 yrs.	F	Control	E. coli spp+ Salmonella Typhi	S. Typhi	Included in H58 phylogeny	24276_3_249	ERR2909585	4.3.1.2.EA2	Yes	6	-	catA1 dfrA7 strA strB sul1 sul2 blaTEM-1 tetB	gyrB-S464F	29	S	6	R	33	S	31	S	30	S	26	I	18	I	6	R	6	R	6	R
MR252	2013-09-23	Stool	Ruben	Rurii	Yes	3 yrs.6 mo.	M	Case	E. coli spp+ Salmonella Typhi	S. Typhi	Included in H58 phylogeny	24276_3_248	ERR2909584	4.3.1.2.EA2	Yes	6	-	catA1 dfrA7 strA strB sul1 sul2 blaTEM-1 tetB	gyrB-S464F	25	S	6	R	20	R	20	I	20	I	25	I	18	I	21	S	6	R	6	R
MR251	2013-09-23	Stool	Ruben	Falcon	Yes	7 yrs. 3 mo.	M	Control	E. coli spp+ Salmonella Typhi	S. Typhi	Included in H58 phylogeny	24276_3_247	ERR2909583	4.3.1.2.EA2	Yes	6	-	catA1 dfrA7 strA strB sul1 sul2 blaTEM-1 tetB	gyrB-S464F	30	S	6	R	30	S	30	S	28	S	25	I	18	I	6	R	6	R	6	R
MR1046	2014-03-03	Stool	Ruben	Rurii	Yes	2 yrs. 6 mo.	F	Control	E. coli spp+ Salmonella enteritidis	S. Typhi	Included in H58 phylogeny	24276_3_244	ERR2909580	4.3.1.2.EA2	Yes	6	-	catA1 dfrA7 strA strB sul1 sul2 blaTEM-1 tetB	gyrB-S464F	27	S	25	S	34	S	32	S	26	S	33	S	25	S	26	S	30	S	23	S
MMM87	2013-08-16	Stool	Njenga	Riara	Yes	5 yrs.10 mo.	F	Case	Salmonella Typhi + E. coli spp	S. Enteritidis ST11	Non-Typhi organism detected	24276_3_242	ERR2909578	-	-	-	-	-	-	22	S	22	S	30	S	26	S	26	S	24	I	11	R	20	S	6	R	24	S
MMM60	2013-08-12	Blood	Njenga	Mukuru kwa Njenga	Yes	4 yrs.	F	Case	Salmonella Typhi	S. Enteritidis ST11	Non-Typhi organism detected	24276_3_241	ERR2909577	-	-	-	-	-	-	30	S	15	I	30	S	30	S	30	S	32	S	22	S	6	R	6	R	6	R
MMM4447	2016-02-08	Blood	Njenga	Vietnam	Yes	6 yrs. 4 mo.	M	Case	Salmonella Typhi	S. Typhi	Included in H58 phylogeny	24276_3_226	ERR2909568	4.3.1.1.EA1	-	-	-	-	gyrA-S83Y	28	S	27	S	32	S	32	S	29	S	23	I	6	R	25	S	30	S	27	S
MMM4342	2016-01-21	Blood	Njenga	48	Yes	9 yrs.	F	Case	Salmonella Typhi	S. Typhi	Included	24276_3_223	ERR2909565	3.0.0	-	-	-	-	-	26	S	13	R	30	S	28	S	20	I	33	S	29	S	21	S	33	S	27	S
MMM3602	2015-07-13	Stool	Njenga	Donholm	No	2 yrs. 6 mo.	F	Case	Klebsiella spp + Salmonella Typhi	S. Enteritidis ST11	Non-Typhi organism detected	24276_3_215	ERR2909558	-	-	-	-	-	-	25	S	22	S	28	S	27	S	26	S	32	S	23	S	24	S	27	S	19	S
MMM354	2013-10-12	Blood	Njenga	Vietnam	Yes	5 yrs.3 mo.	M	Case	Salmonella Typhi	S. Typhi	Included in H58 phylogeny	24276_3_214	ERR2909557	4.3.1.1.EA1	Yes	6	-	catA1 dfrA7 strA strB sul1 sul2 blaTEM-1 tetB	gyrA-S83F	29	S	6	R	30	S	28	S	30	S	23	I	6	R	6	R	6	R	6	R
MMM3404	2015-06-16	Blood	Njenga	Wapewape	Yes	2 yrs. 11 mo.	F	Case	Salmonella Typhi	S. Typhi	Included	24276_3_213	ERR2909556	4.3.1.2.EA3	-	-	near_cyaA	catA1 dfrA7 strA strB sul2 sul1 blaTEM-1	gyrA-S83Y	25	S	6	R	31	S	27	S	29	S	30	S	20	S	6	R	6	R	6	R
MMM3241	2015-05-25	Blood	Njenga	Motomoto	Yes	3 yrs. 11 mo.	M	Case	Salmonella Typhi	S. Enteritidis ST11	Non-Typhi organism detected	24276_3_210	ERR2909555	-	-	-	-	-	-	28	S	18	S	30	S	30	S	30	S	31	S	22	S	21	S	27	S	26	S
MMM3228	2015-05-20	Blood	Njenga	AA/MCC	Yes	1 yrs. 10 mo.	F	Case	Salmonella Typhi	S. Enteritidis ST11	Non-Typhi organism detected	24276_3_209	ERR2909554	-	-	-	-	-	-	24	S	13	R	28	S	29	S	32	S	22	I	18	I	22	S	32	S	23	S
MMM2606	2015-02-09	Blood	Njenga	Riara	Yes	11 yrs. 4 mo.	M	Case	Salmonella Typhi	S. Typhi	Included	24276_3_205	ERR2909551	4.3.1.2.EA3	-	-	near_cyaA	catA1 dfrA7 strA strB sul2 sul1 blaTEM-1	gyrA-S83Y	32	S	6	R	36	S	33	S	31	S	27	I	6	R	26	S	6	R	6	R
MMM2605	2015-02-06	Blood	Njenga	Pipeline	Yes	1 yrs. 8 mo.	F	Case	Salmonella Enteritidis	S. Enteritidis ST11	Included in counts as Typhi	24276_3_204	ERR2909550	-	-	-	-	-	-	29	S	24	S	33	S	33	S	27	S	34	S	25	S	17	S	30	S	22	S
MMM2545	2015-01-29	Stool	Njenga	Tajmall	Yes	3 yrs. 6 mo.	M	Control	E. coli spp + Salmonella Typhi	S. Enteritidis ST11	Non-Typhi organism detected	24276_3_203	ERR2909549	-	-	-	-	-	-	29	S	6	R	33	S	32	S	32	S	27	I	6	R	24	S	6	R	6	R
MMM134	2013-08-26	Blood	Njenga	Motomoto	Yes	7 yrs.	F	Case	Salmonella Typhi	S. Saintpaul ST4971	Non-Typhi organism detected	24276_3_199	ERR2909545	-	-	-	-	-	-	28	S	25	S	31	S	32	S	30	S	34	S	25	S	25	S	30	S	22	S
MMM123	2013-08-21	Stool	Njenga	Sisal	Yes	2 yrs.	M	Control	Salmonella Typhi	S. Enteritidis ST11	Non-Typhi organism detected	24276_3_198	ERR2909544	-	-	-	-	-	-	30	S	26	S	36	S	30	S	28	S	34	S	26	S	26	S	30	S	20	S
MMM114	2013-08-20	Stool	Njenga	Riara	Yes	5 yrs.	F	Control	Salmonella Typhi	S. Typhi	Included in H58 phylogeny	24276_3_197	ERR2909543	4.3.1.2.EA2	Yes	6	-	catA1 dfrA7 strA strB sul1 sul2 blaTEM-1 tetB	gyrB-S464F	30	S	6	R	30	S	30	S	29	S	32	S	21	S	6	R	6	R	20	S
MCC689	2014-07-28	Blood	City council	AA/MCC	Yes	11 mo.	F	Case	Salmonella enteritidis	S. Typhi	Included	24276_3_195	ERR2909541	3.0.0	-	-	-	-	-	33	S	33	S	34	S	33	S	33	S	34	S	32	S	30	S	33	S	23	S
MCC594	2014-07-08	Stool	City council	Motomoto	Yes	10 yrs.	F	Control	Salmonella Typhi	S. Typhi	Included in H58 phylogeny	24276_3_194	ERR2909540	4.3.1.1.EA1	-	-	-	-	-	30	S	28	S	35	S	32	S	29	S	33	S	26	S	26	S	31	S	25	S
MCC340	2014-04-28	Blood	City council	Wapewape	Yes	4 yrs. 4 mo.	F	Case	Salmonella Typhi	S. Typhi	Included in H58 phylogeny	24276_3_193	ERR2909539	4.3.1.2.EA2	Yes	6	-	catA1 dfrA7 strA strB sul1 sul2 blaTEM-1 tetB	gyrB-S464F	28	S	6	R	35	S	33	S	28	S	32	S	22	S	6	R	6	R	6	R
MCC2509	2016-04-06	Stool	City council	48	Yes	5 yrs. 10 mo.	M	Case	Citrobacter spp + Salmonella Typhi	S. Typhi	Included in H58 phylogeny	24276_3_185	ERR2909537	4.3.1.2.EA2	Yes	6	-	catA1 dfrA7 strA strB sul1 sul2 blaTEM-1 tetB	gyrB-S464F	24	S	6	R	33	S	31	S	30	S	28	I	18	I	6	R	6	R	6	R
MCC2454	2016-03-29	Stool	City council	Motomoto	Yes	6 yrs. 9 mo.	M	Case	E. coli spp+ Salmonella Typhi	S. Typhi	Included in H58 phylogeny	24276_3_184	ERR2909536	4.3.1.2.EA2	Yes	6	-	catA1 dfrA7 strA strB sul1 sul2 blaTEM-1 tetB	gyrB-S464F	28	S	14	I	28	S	29	S	30	S	32	S	22	S	6	R	6	R	6	R
MCC2219	2016-02-22	Blood	City council	Vietnam	Yes	4 yrs.	M	Case	Salmonella Typhi	S. Typhi	Included in H58 phylogeny	24276_3_182	ERR2909534	4.3.1.2.EA2	-	-	-	-	gyrB-S464F	30	S	28	S	32	S	32	S	31	S	30	S	19	S	28	S	33	S	28	S
MCC2121	2016-02-08	Blood	City council	Pipeline	Yes	4 yrs. 6 mo.	M	Case	Salmonella Typhi	S. Typhi	Included in H58 phylogeny	24276_3_180	ERR2909532	4.3.1.1.EA1	Yes	6	-	catA1 dfrA7 strA strB sul1 sul2 blaTEM-1 tetB	-	28	S	6	R	34	S	33	S	28	S	35	S	26	S	6	R	6	R	20	S
MCC2070	2016-02-02	Stool	City council	Tassia	No	9 yrs. 2 mo.	M	Control	E. coli spp+ Salmonella Typhi	E. coli	Non-Typhi organism detected	24276_3_178	ERR2909530	-	-	-	-	-	-	28	S	24	S	30	S	32	S	28	S	32	S	25	S	6	R	6	R	25	S
MCC2040	2016-01-28	Blood	City council	Kware	Yes	5 yrs. 11 mo.	M	Case	Salmonella Typhi	S. Typhi	Included in H58 phylogeny	24276_3_177	ERR2909529	4.3.1.2.EA2	Yes	6	-	catA1 dfrA7 strA strB sul1 sul2 blaTEM-1 tetB	gyrB-S464F	30	S	6	R	30	S	30	S	30	S	32	S	21	S	6	R	6	R	6	R
MCC1637	2015-10-01	Stool	City council	Pipeline	Yes	1 yrs.	F	Case	Salmonella Typhi	S. Typhi	Included in H58 phylogeny	24276_3_171	ERR2909523	4.3.1.2.EA2	Yes	6	-	catA1 dfrA7 strA strB sul1 sul2 blaTEM-1 tetB	gyrB-S464F	27	S	6	R	32	S	30	S	28	S	33	S	22	S	6	R	6	R	6	R
MCC1505	2015-08-13	Stool	City council	Motomoto	Yes	5 yrs. 8 mo.	M	Case	E. coli spp+ Salmonella Typhi	S. Typhi	Included in H58 phylogeny	24276_3_170	ERR2909522	4.3.1.2.EA2	-	-	-	-	gyrB-S464F	30	S	6	R	32	S	31	S	30	S	31	S	24	S	6	R	6	R	6	R
MCC1367	2015-07-02	Stool	City council	Motomoto	Yes	3 yrs. 8 mo.	M	Case	Salmonella Typhi	S. Typhi	Included in H58 phylogeny	24276_3_168	ERR2909520	4.3.1.2.EA2	-	-	-	-	gyrB-S464F	28	S	28	S	34	S	31	S	31	S	28	I	16	I	27	S	32	S	28	S
MCC1269	2015-06-04	Stool	City council	Tassia	No	6 yrs. 6 mo.	M	Case	E. coli spp+ Salmonella Typhi	S. Typhi	Included in H58 phylogeny	24276_3_167	ERR2909519	4.3.1.2.EA2	Yes	6	-	catA1 dfrA7 strA strB sul1 sul2 blaTEM-1 tetB	gyrB-S464F	23	S	6	R	33	S	30	S	30	S	30	S	18	I	6	R	6	R	6	R
MCC1123	2015-03-30	Blood	City council	AA/MCC	Yes	3 yrs. 1 mo.	F	Case	Salmonella Typhi	S. Enteritidis ST11	Non-Typhi organism detected	24276_3_165	ERR2909517	-	-	-	-	-	-	27	S	24	S	30	S	32	S	27	S	34	S	23	S	24	S	28	S	27	S
MCC1034	2014-10-16	Stool	City council	Quarry	Yes	2 yrs. 6 mo.	M	Case	Salmonella Typhi	S. Typhi	Included in H58 phylogeny	24276_3_164	ERR2909516	4.3.1.2.EA2	Yes	6	-	catA1 dfrA7 strA strB sul1 sul2 blaTEM-1 tetB	gyrB-S464F	30	S	6	R	36	S	33	S	30	S	31	S	21	S	6	R	6	R	6	R
MB935	2015-06-15	Stool	Mbagathi hospital	Runda estate	No	12 yrs. 1 mo.	M	Case	E. coli spp+ Proteus spp+ Salmonella Typhi	S. Typhi	Included in H58 phylogeny	24276_3_163	ERR2909515	4.3.1.2.EA2	Yes	6	-	catA1 dfrA7 strA strB sul1 sul2 blaTEM-1 tetB	gyrB-S464F	25	S	6	R	30	S	26	S	27	S	26	I	16	I	6	R	6	R	6	R
MB885	2015-06-08	Blood	Mbagathi hospital	Githurai	No	6 yrs. 8 mo.	F	Case	Salmonella Typhi	S. Typhi	Included in H58 phylogeny	24276_3_162	ERR2909514	4.3.1.2.EA2	Yes	6	-	catA1 dfrA7 strA strB sul1 sul2 blaTEM-1 tetB	gyrB-S464F	28	S	6	R	33	S	31	S	30	S	29	I	17	I	6	R	6	R	6	R
MB883	2015-06-08	Blood	Mbagathi hospital	Satellite	No	4 yrs. 3 mo.	F	Case	Salmonella Typhi	S. Typhi	Included in H58 phylogeny	24276_3_161	ERR2909513	4.3.1.2.EA2	Yes	6	-	catA1 dfrA7 strA strB sul1 sul2 blaTEM-1 tetB	gyrB-S464F	27	S	6	R	30	S	30	S	29	S	30	S	20	S	6	R	6	R	6	R
MB804	2015-05-26	Blood	Mbagathi hospital	Gikomba	No	1 yrs. 10 mo.	M	Case	Salmonella Typhi	S. Typhi	Included in H58 phylogeny	24276_3_160	ERR2909512	4.3.1.2.EA2	-	-	-	-	gyrB-S464F	23	S	21	S	34	S	32	S	26	S	28	I	18	I	22	S	30	S	22	S
MB693	2015-05-05	Stool	Mbagathi hospital	Thika road	No	12 yrs. 4 mo.	F	Control	Salmonella Typhi	S. Typhi	Included in H58 phylogeny	24276_3_159	ERR2909511	4.3.1.2.EA2	Yes	6	-	catA1 dfrA7 strA strB sul1 sul2 blaTEM-1 tetB	gyrB-S464F	29	S	8	R	30	S	30	S	28	S	26	I	18	I	6	R	6	R	6	R
MB630	2015-04-21	Stool	Mbagathi hospital	Makadara	No	11 yrs. 5 mo.	F	Control	Salmonella Typhi	S. Typhi	Included in H58 phylogeny	24276_3_157	ERR2909509	4.3.1.2.EA2	Yes	6	-	catA1 dfrA7 strA strB sul1 sul2 blaTEM-1 tetB	gyrB-S464F	27	S	6	R	31	S	30	S	26	S	24	I	18	I	6	R	6	R	6	R
MB469	2015-03-17	Stool	Mbagathi hospital	Ngong	No	7 yrs. 4 mo.	F	Control	Proteus spp + Klebsiella spp + Salmonella Typhi	S. Typhi	Included in H58 phylogeny	24276_3_155	ERR2909508	4.3.1.1.EA1	Yes	6	-	catA1 dfrA7 strA strB sul1 sul2 blaTEM-1 tetB	-	25	S	10	R	30	S	30	S	29	S	28	I	18	I	6	R	6	R	6	R
MB428	2015-03-09	Stool	Mbagathi hospital	Kiserian	No	5 yrs. 5 mo.	M	Control	E. coli spp+ Klebsiella spp + Salmonella Typhi	S. Typhi	Included	24276_3_154	ERR2909507	2.5.0	-	-	-	-	-	36	S	32	S	34	S	34	S	28	S	32	S	25	S	25	S	29	S	26	S
MB423	2015-03-04	Stool	Mbagathi hospital	Pumwani	No	3 yrs. 4 mo.	F	Case	Salmonella Typhi	S. Typhi	Included in H58 phylogeny	24276_3_153	ERR2909506	4.3.1.2.EA2	Yes	6	-	catA1 dfrA7 strA strB sul1 sul2 blaTEM-1 tetB	gyrB-S464F	28	S	6	R	35	S	32	S	25	S	25	I	17	I	6	R	6	R	6	R
MB360	2015-02-19	Blood	Mbagathi hospital	Kibera	No	1 yrs. 3 mo.	F	Case	Salmonella Typhi	S. Typhi	Included in H58 phylogeny	24276_3_152	ERR2909505	4.3.1.1.EA1	-	-	near_cyaA	catA1 dfrA7 strA strB sul1 sul2 blaTEM-1	-	27	S	6	R	30	S	27	S	30	S	32	S	28	S	26	S	6	R	6	R
MB240	2015-01-15	Blood	Mbagathi hospital	Lungalunga	No	6 yrs. 11 mo.	F	Case	Salmonella Typhi	S. Typhi	Included in H58 phylogeny	24276_3_142	ERR2909503	4.3.1.1.EA1	-	-	near_cyaA	catA1 dfrA7 strA strB sul1 sul2 blaTEM-1	-	31	S	6	R	34	S	32	S	30	S	32	S	26	S	27	S	6	R	6	R
MB229	2015-01-13	Stool	Mbagathi hospital	Kawangware	No	9 yrs. 9 mo.	M	Control	Salmonella Typhi	S. Typhi	Included in H58 phylogeny	24276_3_141	ERR2909502	4.3.1.2.EA3	-	-	near_cyaA	catA1 dfrA7 strA strB sul2 sul1 blaTEM-1	gyrA-S83Y	26	S	6	R	33	S	31	S	28	S	25	I	6	R	24	S	6	R	6	R
MB2176	2016-03-14	Blood	Mbagathi hospital	Kawangware	No	3 yrs. 7 mo.	M	Case	Salmonella Typhi	S. Typhimurium ST313	Non-Typhi organism detected	24276_3_138	ERR2909499	-	-	-	-	-	-	30	S	6	R	31	S	28	S	30	S	32	S	28	S	25	S	6	R	6	R
MB2064	2016-02-24	Blood	Mbagathi hospital	Tassia	No	7 yrs. 6 mo.	M	Case	Salmonella Typhi	S. Typhi	Included in H58 phylogeny	24276_3_135	ERR2909496	4.3.1.2.EA2	-	-	-	-	gyrB-S464F	30	S	30	S	34	S	32	S	32	S	27	I	15	I	27	S	34	S	32	S
MB2061	2016-02-24	Stool	Mbagathi hospital	Kibera	No	7 yrs. 11 mo.	M	Case	E. coli spp+ Salmonella Typhi	S. Typhi	Included in H58 phylogeny	24276_3_134	ERR2909495	4.3.1.1.EA1	-	-	near_cyaA	catA1 dfrA7 strA strB sul1 sul2 blaTEM-1	-	32	S	16	I	34	S	32	S	30	S	32	S	20	S	28	S	6	R	6	R
MB2027	2016-02-22	Stool	Mbagathi hospital	Kitengela	No	5 yrs. 3 mo.	F	Control	Citrobacter spp + Salmonella Typhi	Enterobacter spp.	Non-Typhi organism detected	24276_3_131	ERR2909492	-	-	-	-	-	-	28	S	18	S	29	S	30	S	24	S	30	S	16	I	23	S	28	S	25	S
MB1976	2016-02-10	Blood	Mbagathi hospital	Da-ora Phase 4	No	5 yrs. 4 mo.	M	Case	Salmonella Typhi	S. Typhi	Included in H58 phylogeny	24276_3_129	ERR2909490	4.3.1.2.EA2	Yes	6	-	catA1 dfrA7 strA strB sul1 sul2 blaTEM-1 tetB	gyrB-S464F	30	S	6	R	31	S	30	S	30	S	27	I	18	I	6	R	6	R	6	R
MB1895	2016-01-26	Blood	Mbagathi hospital	Kawangware	No	12 yrs. 6 mo.	M	Case	Salmonella Typhi	S. Typhi	Included in H58 phylogeny	24276_3_126	ERR2909487	4.3.1.1.EA1	Yes	6	-	catA1 dfrA7 strA strB sul1 sul2 blaTEM-1 tetB	-	28	S	6	R	31	S	31	S	30	S	32	S	28	S	6	R	6	R	17	I
MB1881	2016-01-25	Blood	Mbagathi hospital	Gatoto	Yes	6 yrs. 10 mo.	M	Case	Salmonella Typhi	S. Enteritidis ST11	Non-Typhi organism detected	24276_3_125	ERR2909486	-	-	-	-	-	-	30	S	6	R	32	S	32	S	28	S	32	S	26	S	6	R	6	R	15	I
MB1793	2015-11-17	Blood	Mbagathi hospital	Feed the children	Yes	5 yrs. 4 mo.	M	Case	Salmonella Typhi	S. Typhi	Included in H58 phylogeny	24276_3_122	ERR2909483	4.3.1.1.EA1	-	-	near_cyaA	catA1 dfrA7 strA strB sul1 sul2 blaTEM-1	-	30	S	6	R	30	S	30	S	28	S	32	S	20	S	27	S	6	R	6	R
MB1650	2015-10-21	Blood	Mbagathi hospital	Kirinyaga road	No	5 yrs. 4 mo.	M	Case	Salmonella Typhi	S. Typhi	Included	24276_3_118	ERR2909479	4.3.1.1.EA1	Yes	6	-	catA1 dfrA7 strA strB sul2 sul1 blaTEM-1 tetB	-	30	S	6	R	31	S	31	S	28	S	32	S	25	S	6	R	6	R	6	R
MB1602	2015-10-12	Blood	Mbagathi hospital	Gatoto	Yes	8 yrs. 3 mo.	M	Case	Salmonella Typhi	S. Enteritidis ST11	Non-Typhi organism detected	24276_3_117	ERR2909478	-	-	-	-	-	-	28	S	24	S	30	S	31	S	29	S	33	S	25	S	23	S	28	S	28	S
MB1544	2015-09-28	Blood	Mbagathi hospital	Dandora	No	4 yrs. 3 mo.	M	Case	Salmonella Typhi	S. Typhi	Included in H58 phylogeny	24276_3_116	ERR2909477	4.3.1.1.EA1	-	-	near_cyaA	catA1 dfrA7 strA strB sul1 sul2 blaTEM-1	-	28	S	6	R	32	S	31	S	27	S	31	S	26	S	26	S	6	R	6	R
MB1464	2015-09-14	Stool	Mbagathi hospital	Kibera	No	9 yrs.	F	Case	Salmonella Typhi	S. Typhi	Included in H58 phylogeny	24276_3_115	ERR2909476	4.3.1.2.EA2	Yes	6	-	catA1 dfrA7 strA strB sul1 sul2 blaTEM-1 tetB	gyrB-S464F	31	S	6	R	33	S	29	S	32	S	31	S	21	S	6	R	6	R	6	R
MB1404	2015-08-28	Blood	Mbagathi hospital	Kibera	No	5 yrs. 10 mo.	F	Case	Salmonella Typhi	S. Typhi	Included in H58 phylogeny	24276_3_113	ERR2909474	4.3.1.1.EA1	-	-	near_cyaA	catA1 dfrA7 strA strB sul1 sul2 blaTEM-1	-	30	S	6	R	31	S	30	S	28	S	28	I	18	I	24	S	6	R	6	R
MB1397	2015-08-27	Blood	Mbagathi hospital	Highrise	No	8 yrs. 7 mo.	M	Case	Salmonella Typhi	S. Enteritidis ST11	Non-Typhi organism detected	24276_3_112	ERR2909473	-	-	-	-	-	-	26	S	19	S	29	S	30	S	25	S	32	S	20	S	20	S	26	S	16	I
MB1237	2015-07-31	Blood	Mbagathi hospital	Rongai	No	3 yrs. 6 mo.	M	Case	Salmonella Typhi	S. Enteritidis ST11	Non-Typhi organism detected	24276_3_111	ERR2909472	-	-	-	-	-	-	26	S	20	S	30	S	30	S	24	S	32	S	19	S	19	S	22	S	15	I
MR573	2013-11-26	Stool	Ruben	-	-	2 yrs. 1 mo.	M	Case	Klebsiella spp + Salmonella Typhi	Citrobacter spp.	Non-Typhi organism detected	22306_3_62	ERR2533841	-	-	-	-	-	-	25	S	16	I	25	I	26	S	21	S	25	I	18	I	21	S	25	S	20	S
MR3895	2016-02-08	Stool	Ruben	Railway	Yes	1 yrs. 7 mo.	M	Case	E. coli spp+ Salmonella Typhi	E.coli/Salmonella spp. ST3007	Non-Typhi organism detected	22204_7_264	ERR2525518	-	-	-	-	-	-	27	S	18	S	30	S	26	S	30	S	31	S	28	S	25	S	28	S	22	S
MB698	2015-05-07	Stool	Mbagathi hospital	Kibera	No	7 yrs. 6 mo.	F	Control	Salmonella Typhi	S. Typhi	Included in H58 phylogeny	22204_7_262	ERR2525516	4.3.1.2.EA2	-	-	-	-	gyrB-S464F	27	S	33	S	30	S	30	S	26	S	32	S	20	S	6	R	22	S	22	S
MB1015	2015-06-29	Blood	Mbagathi hospital	Kawangware	No	2 yrs. 7 mo.	F	Case	Salmonella Typhi	S. Typhi	Included in H58 phylogeny	22204_7_261	ERR2525515	4.3.1.1.EA1	Yes	6	-	catA1 dfrA7 strA strB sul1 sul2 blaTEM-1 tetB	-	21	S	6	R	27	S	28	S	27	S	32	S	23	S	6	R	6	R	6	R
MR2824	2015-03-05	Stool	Ruben	Riara	Yes	4 yrs. 1 mo.	F	Case	E. coli spp+ Salmonella Typhi	S. Heidelberg ST15	Non-Typhi organism detected	22204_7_253	ERR2525510	-	-	-	-	-	-	27	S	24	S	30	S	30	S	30	S	31	S	24	S	25	S	28	S	20	S
MMM2903	2015-03-18	Blood	Njenga	AA/MCC	Yes	11 yrs.	M	Case	S. epidermidis + Salmonella Typhi	S. Typhi	Included in H58 phylogeny	22204_7_251	ERR2525508	4.3.1.2.EA3	-	-	near_cyaA	catA1 dfrA7 strA strB sul2 sul1 blaTEM-1	gyrA-S83Y	31	S	7	R	33	S	32	S	28	S	25	I	6	R	26	S	6	R	13	R
MR3127	2015-05-21	Stool	Ruben	Simbacool	Yes	3 yrs. 4 mo.	M	Control	Salmonella Typhi	Enterobacter spp.	Non-Typhi organism detected	22204_7_241	ERR2525503	-	-	-	-	-	-	24	S	10	R	30	S	27	S	21	S	27	I	18	I	20	S	25	S	25	S
MCC1301	2015-06-12	Stool	City council	Transami	Yes	10 yrs. 3 mo.	M	Control	Salmonella Typhi	S. Typhi	Included in H58 phylogeny	22204_7_236	ERR2525501	4.3.1.2.EA2	Yes	6	-	catA1 dfrA7 strA strB sul1 sul2 blaTEM-1 tetB	gyrB-S464F	25	S	6	R	27	S	28	S	27	S	26	I	16	I	6	R	6	R	6	R
MR3228	2015-06-09	Stool	Ruben	Gatoto	Yes	5 mo.	M	Case	Citrobacter spp + Salmonella Typhi	Citrobacter spp.	Non-Typhi organism detected	22204_7_234	ERR2525500	-	-	-	-	-	-	25	S	21	S	30	S	30	S	22	S	29	I	15	I	21	S	25	S	27	S
MB777	2015-05-21	Stool	Mbagathi hospital	Gikomba	No	1 yrs. 10 mo.	M	Case	Salmonella Typhi	Proteus spp.	Non-Typhi organism detected	22204_7_231	ERR2525498	-	-	-	-	-	-	28	S	6	R	36	S	34	S	30	S	17	R	6	R	8	R	6	R	21	S
MMM3353	2015-06-09	Stool	Njenga	Vietnam	Yes	3 yrs. 5 mo.	F	Case	E. coli spp + Salmonella Typhi	S. Typhimurium ST313	Non-Typhi organism detected	22204_7_230	ERR2525497	-	-	-	-	-	-	20	I	6	R	34	S	32	S	29	S	38	S	25	S	6	R	6	R	6	R
MB308	2015-02-04	Blood	Mbagathi hospital	Line saba	No	7 yrs. 10 mo.	M	Case	Salmonella Typhi	S. Typhi	Included	22204_7_226	ERR2525495	4.3.1.1.EA1	-	-	near_cyaA	catA1 dfrA7 strA strB sul2 sul1 blaTEM-1	-	30	S	6	R	35	S	34	S	30	S	33	S	27	S	27	S	6	R	6	R
MR2983	2015-04-13	Stool	Ruben	Simbacool	Yes	9 mo.	F	Control	E. coli spp+ Salmonella Typhi	S. Typhi	Included in H58 phylogeny	22204_7_223	ERR2525493	4.3.1.2.EA2	Yes	Untypeable	-	catA1 dfrA7 strA strB sul1 sul2 blaTEM-1 tetB	gyrB-S464F	25	S	6	R	30	S	30	S	25	S	22	I	18	I	6	R	6	R	12	R
MR3070	2015-05-12	Stool	Ruben	Gatoto	Yes	1 yrs. 4 mo.	M	Control	Salmonella Typhi	S. Typhi	Included in H58 phylogeny	22204_7_219	ERR2525491	4.3.1.2.EA3	-	-	near_cyaA	catA1 dfrA7 strA strB sul2 sul1 blaTEM-1	gyrA-S83Y	31	S	10	R	34	S	32	S	30	S	26	I	6	R	27	S	6	R	9	R
MMM2458	2015-01-14	Stool	Njenga	Wapewape	Yes	2 yrs. 1 mo.	M	Case	Salmonella enteritidis	S. Typhi	Included	22204_7_217	ERR2525489	4.3.1.2.EA3	-	-	-	-	gyrA-S83Y	31	S	9	R	34	S	32	S	28	S	34	S	26	S	23	S	6	R	21	S
MR2608	2015-01-14	Blood	Ruben	Wapewape	Yes	3 yrs. 6 mo.	F	Case	Salmonella Typhi	S. Typhi	Included in H58 phylogeny	22204_7_216	ERR2525488	4.3.1.1.EA1	Yes	6	-	catA1 dfrA7 strA strB sul1 sul2 blaTEM-1 tetB	gyrA-D87G	29	S	6	R	31	S	31	S	30	S	25	I	12	R	6	R	6	R	6	R
MMM4551	2016-02-25	Blood	Njenga	Tassia	No	14 yrs.	M	Case	Salmonella Typhi	S. Typhi	Included in H58 phylogeny	22204_7_215	ERR2525487	4.3.1.1.EA1	-	-	-	-	gyrA-S83F	28	S	27	S	30	S	28	S	28	S	26	I	6	R	25	S	27	S	22	S
MB402	2015-03-02	Stool	Mbagathi hospital	Kayole	No	5 yrs. 4 mo.	M	Control	E. coli spp+ Salmonella Typhi	S. Enteritidis ST11	Non-Typhi organism detected	22204_7_213	ERR2525486	-	-	-	-	-	-	24	S	6	R	22	R	30	S	28	S	35	S	21	S	6	R	6	R	6	R
MMM4077	2015-10-19	Stool	Njenga	Motomoto	Yes	5 yrs.	F	Case	Salmonella Typhi	S. Typhi	Included in H58 phylogeny	22204_7_210	ERR2525484	4.3.1.2.EA2	Yes	6	-	catA1 dfrA7 strA strB sul1 sul2 blaTEM-1 tetB	gyrB-S464F	29	S	6	R	33	S	32	S	30	S	27	I	18	I	6	R	6	R	6	R
MB1674	2015-10-26	Stool	Mbagathi hospital	Mwiki	No	6 yrs. 1 mo.	F	Case	Salmonella Typhi	S. Typhi	Included in H58 phylogeny	22204_7_209	ERR2525483	4.3.1.2.EA2	Yes	6	-	catA1 dfrA7 strA strB sul1 sul2 blaTEM-1 tetB	gyrB-S464F	28	S	25	S	31	S	31	S	25	S	31	S	28	S	24	S	27	S	20	S
MCC1781	2015-11-09	Stool	City council	AA/MCC	Yes	3 yrs. 9 mo.	F	Control	Salmonella paratyphi A	S. Typhi	Included in H58 phylogeny	22204_7_142	ERR2525481	4.3.1.1.EA1	-	-	near_cyaA	catA1 dfrA7 strA strB sul1 sul2 blaTEM-1	-	30	S	20	S	36	S	34	S	27	S	36	S	26	S	6	R	6	R	19	S
MR4066	2016-03-09	Blood	Ruben	Mombasa	Yes	11 yrs. 9 mo.	M	Case	Salmonella Typhi	S. Typhi	Included in H58 phylogeny	22204_7_95	ERR2525467	4.3.1.1.EA1	-	-	-	-	gyrA-S83F	30	S	28	S	32	S	32	S	29	S	25	I	6	R	27	S	32	S	27	S
MMM5497	2016-08-15	Stool	Njenga	Riara	Yes	15 yrs.	M	Control	E. coli spp + Salmonella Typhi	Not sequenced	Not sequenced	-	-	-	-	-	-	-	-	25	S	19	S	30	S	27	S	25	S	37	S	26	S	23	S	23	S	26	S
MB1828	2016-01-12	Stool	Mbagathi hospital	South B	No	8 yrs. 7 mo.	M	Control	Salmonella Typhi	Failed sequencing	Failed sequencing	-	-	-	-	-	-	-	-	30	S	6	R	31	S	32	S	29	S	34	S	25	S	25	S	6	R	6	R
MR4489	2016-07-18	Stool	Ruben	Falcon	Yes	5 yrs. 7 mo.	F	Case	Salmonella Typhi	Not sequenced	Not sequenced	-	-	-	-	-	-	-	-	24	S	13	R	28	S	26	S	21	S	34	S	23	S	22	S	25	S	24	S
MR4425	2016-06-28	Stool	Ruben	Kosovo	Yes	1 yrs. 6 mo.	F	Case	Proteus spp + Salmonella Typhi	Not sequenced	Not sequenced	-	-	-	-	-	-	-	-	24	S	19	S	29	S	27	S	21	S	34	S	22	S	21	S	27	S	6	R
MCC2992	2016-07-26	Stool	City council	Wapewape	Yes	8 yrs. 2 mo.	M	Control	E. coli spp+ Salmonella Typhi	Not sequenced	Not sequenced	-	-	-	-	-	-	-	-	27	S	22	S	32	S	29	S	26	S	33	S	23	S	24	S	28	S	26	S
MCC652	2014-07-17	Stool	City council	AA/MCC	Yes	5 yrs. 9 mo.	F	Case	Salmonella Typhi	Not sequenced	Not sequenced	-	-	-	-	-	-	-	-	28	S	6	R	33	S	30	S	29	S	33	S	21	S	6	R	6	R	10	R
MMM5498	2016-08-15	Stool	Njenga	Pipeline	Yes	2 yrs. 1 mo.	F	Control	Klebsiella spp + Salmonella Typhi	Not sequenced	Not sequenced	-	-	-	-	-	-	-	-	23	S	6	R	28	S	27	S	21	S	33	S	23	S	19	S	25	S	21	S
MCC284	2014-04-14	Stool	City council	Pipeline	Yes	9 mo.	M	Control	Salmonella Typhi	Not sequenced	Not sequenced	-	-	-	-	-	-	-	-	27	S	6	R	32	S	31	S	28	S	32	S	24	S	6	R	6	R	6	R
MCC3126	2016-08-30	Stool	City council	Pipeline	Yes	6 yrs.	F	Control	Proteus spp + Salmonella Typhi	Not sequenced	Not sequenced	-	-	-	-	-	-	-	-	28	S	23	S	30	S	31	S	24	S	32	S	24	S	22	S	6	R	24	S
MB2849	2016-09-28	Blood	Mbagathi hospital	Kibra	No	4 yrs. 3 mo.	M	Case	S. epidermidis + Salmonella Typhi	Failed sequencing	Failed sequencing	-	-	-	-	-	-	-	-	29	S	6	R	28	S	30	S	28	S	32	S	24	S	24	S	6	R	6	R
MCC3120	2016-08-29	Stool	City council	48	Yes	4 yrs.	M	Control	Klebsiella spp + Salmonella Typhi	Not sequenced	Not sequenced	-	-	-	-	-	-	-	-	25	S	18	S	30	S	28	S	24	S	32	S	22	S	21	S	26	S	24	S
MR4578	2016-08-15	Stool	Ruben	Riara	Yes	11 mo.	F	Case	E. coli spp+ Salmonella Typhi	Not sequenced	Not sequenced	-	-	-	-	-	-	-	-	25	S	6	R	28	S	27	S	22	S	32	S	24	S	6	R	6	R	23	S
MB2719	2016-08-16	Stool	Mbagathi hospital	Kibera	No	9 yrs. 11 mo.	M	Control	Salmonella Typhi	Not sequenced	Not sequenced	-	-	-	-	-	-	-	-	27	S	6	R	33	S	30	S	28	S	31	S	24	S	21	S	6	R	6	R
MMM5435	2016-08-01	Stool	Njenga	Quarry	Yes	5 mo.	M	Case	Salmonella Typhi	Not sequenced	Not sequenced	-	-	-	-	-	-	-	-	24	S	6	R	27	S	27	S	21	S	31	S	23	S	21	S	6	R	22	S
MCC3094	2016-08-16	Stool	City council	Motomoto	Yes	4 yrs. 6 mo.	M	Control	Klebsiella spp + Salmonella Typhi	Not sequenced	Not sequenced	-	-	-	-	-	-	-	-	26	S	6	R	30	S	27	S	20	I	31	S	19	S	18	S	22	S	31	S
MCC3123	2016-08-29	Stool	City council	Pipeline	Yes	3 yrs. 8 mo.	F	Case	Citrobacter spp + Salmonella Typhi	Not sequenced	Not sequenced	-	-	-	-	-	-	-	-	6	R	6	R	25	I	24	S	23	S	29	I	6	R	6	R	6	R	26	S
MCC3027	2016-08-01	Stool	City council	AA/MCC	Yes	2 yrs. 11 mo.	M	Case	Salmonella Typhi	Not sequenced	Not sequenced	-	-	-	-	-	-	-	-	30	S	19	S	31	S	28	S	21	S	29	I	17	I	21	S	26	S	25	S
MCC3064	2016-08-09	Stool	City council	AA/MCC	Yes	12 yrs. 2 mo.	M	Control	Proteus spp + Salmonella Typhi	Not sequenced	Not sequenced	-	-	-	-	-	-	-	-	26	S	19	S	29	S	30	S	24	S	28	I	6	R	21	S	6	R	24	S
MR4507	2016-07-18	Stool	Ruben	Falcon	Yes	9 yrs. 9 mo.	M	Control	Salmonella Typhi	Not sequenced	Not sequenced	-	-	-	-	-	-	-	-	30	S	6	R	38	S	24	S	26	S	26	I	6	R	6	R	6	R	28	S
MMM4896	2016-04-25	Stool	Njenga	Sisal	Yes	8 mo.	F	Case	E. coli spp + Salmonella Typhi	Not sequenced	Not sequenced	-	-	-	-	-	-	-	-	26	S	6	R	32	S	30	S	25	S	26	I	18	I	6	R	6	R	27	S
MMM2445	2015-01-12	Stool	Njenga	Motomoto	Yes	4 yrs.	M	Case	Salmonella Typhi	Not sequenced	Not sequenced	-	-	-	-	-	-	-	-	28	S	12	R	32	S	30	S	29	S	25	I	6	R	24	S	6	R	6	R
MMM5472	2016-08-10	Stool	Njenga	Wapewape	Yes	11 yrs.	M	Case	E. coli spp + Salmonella Typhi	Not sequenced	Not sequenced	-	-	-	-	-	-	-	-	31	S	6	R	34	S	30	S	28	S	25	I	6	R	27	S	15	I	6	R
MCC3025	2016-08-01	Stool	City council	Vietnam	Yes	6 yrs. 3 mo.	F	Case	Salmonella Typhi	Not sequenced	Not sequenced	-	-	-	-	-	-	-	-	30	S	6	R	30	S	32	S	25	S	24	I	17	I	6	R	6	R	24	S
MMM5495	2016-08-15	Blood	Njenga	Tassia	No	5 yrs. 8 mo.	F	Case	Salmonella Typhi	Not sequenced	Not sequenced	-	-	-	-	-	-	-	-	26	S	25	S	30	S	31	S	26	S	23	I	6	R	26	S	30	S	24	S
