# Supplementary material for: Multiple introductions of multidrug-resistant typhoid associated with acute infection and asymptomatic carriage, Kenya
Source: eLife journal article supplement (doi:10.7554/elife.67852), 2021-09-13
Supplement: supp [file elife-67852-supp-v1.zip › elife_poa_e67852_Supplementary_file_2.xlsx]

## Sheet: Sheet1
Lane_id	Accession_number	Genotype	Year	Country	Publication	Purpose
10593_2_44	ERR360657	0.0.1	1998	Cameroon	Wong et al. 2016	Outgroup
10562_2_20	ERR357775	0.0.2	2011	Indonesia	Wong et al. 2016	Outgroup
10349_1_89	ERR343337	0.0.3	2002	India	Wong et al. 2016	Outgroup
10592_2_36	ERR360484	0.1	2009	Algeria	Wong et al. 2016	Outgroup
10592_2_57	ERR360505	0.1.1	2001	Cameroon	Wong et al. 2016	Outgroup
10593_2_55	ERR360668	0.1.2	1999	Algeria	Wong et al. 2016	Outgroup
10592_2_38	ERR360486	0.1.3	1998	Peru	Wong et al. 2016	Outgroup
10593_2_14	ERR360627	1.1.1	2005	Algeria	Wong et al. 2016	Outgroup
10071_3_32	ERR338008	1.1.2	2007	South Africa	Wong et al. 2016	Outgroup
10592_2_63	ERR360511	1.1.3	1976	Democratic Republic of the Congo	Wong et al. 2016	Outgroup
10493_1_28	ERR352453	1.1.4	2011	Unknown	Wong et al. 2016	Outgroup
10561_2_77	ERR357652	1.2.1	1993	Vietnam	Wong et al. 2016	Outgroup
10592_2_5	ERR360453	2	2003	Pakistan	Wong et al. 2016	Outgroup
10592_2_2	ERR360450	2.0.1	2003	Pakistan	Wong et al. 2016	Outgroup
10349_1_73	ERR343321	2.0.2	2011	Mexico	Wong et al. 2016	Outgroup
10541_2_8	ERR357445	2.1	2011	East Timor	Wong et al. 2016	Outgroup
10060_5_18	ERR331221	2.1.1	2006	Indonesia	Wong et al. 2016	Outgroup
10349_1_3	ERR343251	2.1.2	2002	Western Asia	Wong et al. 2016	Outgroup
10071_3_76	ERR338052	2.1.3	2004	Indonesia	Wong et al. 2016	Outgroup
10349_1_2	ERR343250	2.1.4	2002	Western Asia	Wong et al. 2016	Outgroup
10493_1_42	ERR352467	2.1.5	2011	Indonesia	Wong et al. 2016	Outgroup
10060_5_49	ERR331252	2.1.6	2009	Indonesia	Wong et al. 2016	Outgroup
10562_2_49	ERR357804	2.1.7.1	1993	Papua New Guinea	Wong et al. 2016	Outgroup
9953_5_54	ERR326650	2.1.8	2006	Indonesia	Wong et al. 2016	Outgroup
9953_5_57	ERR326653	2.1.9	2007	Indonesia	Wong et al. 2016	Outgroup
10060_6_73	ERR331370	2.2	2006	Tanzania	Wong et al. 2016	Outgroup
10493_1_15	ERR352440	2.2.1	2012	India	Wong et al. 2016	Outgroup
10562_2_12	ERR357767	2.2.2	2011	India	Wong et al. 2016	Outgroup
10209_5_36	ERR340792	2.2.3	2002	Laos	Wong et al. 2016	Outgroup
9475_4_57	ERR279353	2.2.4	2004	India	Wong et al. 2016	Outgroup
10593_2_56	ERR360669	2.3.1	2007	Cameroon	Wong et al. 2016	Outgroup
10592_2_59	ERR360507	2.3.2	1999	Mali	Wong et al. 2016	Outgroup
10593_2_49	ERR360662	2.3.3	2000	Bangladesh	Wong et al. 2016	Outgroup
9953_5_69	ERR326665	2.3.4	2010	Laos	Wong et al. 2016	Outgroup
10493_1_70	ERR352495	2.3.5	1983	Fiji	Wong et al. 2016	Outgroup
10071_3_68	ERR338044	2.4	2009	South Africa	Wong et al. 2016	Outgroup
10071_3_40	ERR338016	2.4.1	2006	South Africa	Wong et al. 2016	Outgroup
10349_1_5	ERR343253	2.5	2002	India	Wong et al. 2016	Outgroup
10561_2_5	ERR357580	2.5.1	2011	DRC	Wong et al. 2016	Outgroup
10060_5_34	ERR331237	3	2011	Indonesia	Wong et al. 2016	Outgroup
10593_2_45	ERR360658	3.0.1	2000	Morocco	Wong et al. 2016	Outgroup
10541_2_6	ERR357443	3.0.2	2012	India	Wong et al. 2016	Outgroup
10593_2_18	ERR360631	3.1	2002	China	Wong et al. 2016	Outgroup
10593_2_58	ERR360671	3.1.1	2004	Benin	Wong et al. 2016	Outgroup
9953_5_15	ERR326611	3.1.2	2010	Indonesia	Wong et al. 2016	Outgroup
10060_6_66	ERR331363	3.2.1	2010	Laos	Wong et al. 2016	Outgroup
10592_2_25	ERR360473	3.2.2	2003	Pakistan	Wong et al. 2016	Outgroup
10592_2_17	ERR360465	3.3	2003	Pakistan	Wong et al. 2016	Outgroup
7468_7_78	ERR108677	3.3.1	2009	Tanzania	Wong et al. 2016	Outgroup
9953_5_93	ERR326689	3.4	2008	Laos	Wong et al. 2016	Outgroup
8490_6_44	ERR213262	3.5	1996	Fiji	Wong et al. 2016	Outgroup
10493_1_76	ERR352501	3.5.1	1985	Fiji	Wong et al. 2016	Outgroup
10060_6_15	ERR331312	3.5.2	2010	Laos	Wong et al. 2016	Outgroup
10492_1_5	ERR352258	3.5.3	2010	Samoa	Wong et al. 2016	Outgroup
10071_8_55	ERR338124	3.5.4	2012	Samoa	Wong et al. 2016	Outgroup
10071_8_60	ERR338129	4.1	2012	Samoa	Wong et al. 2016	Outgroup
9475_6_92	ERR279189	4.1.1	2006	Malawi	Wong et al. 2016	Outgroup
8490_6_49	ERR213267	4.2	1996	Fiji	Wong et al. 2016	Outgroup
8447_8_28	ERR204271	4.2.1	2008	Fiji	Wong et al. 2016	Outgroup
8490_5_25	ERR213243	4.2.2	2011	Fiji	Wong et al. 2016	Outgroup
8490_6_61	ERR213279	4.2.3	1994	Fiji	Wong et al. 2016	Outgroup
22204_7_216	ERR2525488	4.3.1.1.EA1	2015	Kenya	This study	Global H58 Phylogeny
22204_7_210	ERR2525484	4.3.1.2.EA2	2015	Kenya	This study	Global H58 Phylogeny
22204_7_146	ERR3332556	4.3.1.2.EA2	2013	Kenya	This study	Global H58 Phylogeny
24276_3_193	ERR2909539	4.3.1.2.EA2	2014	Kenya	This study	Global H58 Phylogeny
22306_3_188	ERR3332729	4.3.1.2.EA2	2014	Kenya	This study	Global H58 Phylogeny
24276_3_238	ERR3332780	4.3.1.1.EA1	2016	Kenya	This study	Global H58 Phylogeny
24276_3_226	ERR2909568	4.3.1.1.EA1	2016	Kenya	This study	Global H58 Phylogeny
24276_3_214	ERR2909557	4.3.1.1.EA1	2013	Kenya	This study	Global H58 Phylogeny
22306_3_140	ERR3332691	4.3.1.2.EA2	2015	Kenya	This study	Global H58 Phylogeny
22306_3_177	ERR3332719	4.3.1.2.EA2	2013	Kenya	This study	Global H58 Phylogeny
22306_3_207	ERR3332746	4.3.1.1.EA1	2014	Kenya	This study	Global H58 Phylogeny
22306_3_56	ERR3332634	4.3.1.1.EA1	2013	Kenya	This study	Global H58 Phylogeny
24276_3_182	ERR2909534	4.3.1.2.EA2	2016	Kenya	This study	Global H58 Phylogeny
24276_3_170	ERR2909522	4.3.1.2.EA2	2015	Kenya	This study	Global H58 Phylogeny
22204_7_236	ERR2525501	4.3.1.2.EA2	2015	Kenya	This study	Global H58 Phylogeny
24276_3_159	ERR2909511	4.3.1.2.EA2	2015	Kenya	This study	Global H58 Phylogeny
22204_7_215	ERR2525487	4.3.1.1.EA1	2016	Kenya	This study	Global H58 Phylogeny
22306_3_206	ERR3332745	4.3.1.1.EA1	2013	Kenya	This study	Global H58 Phylogeny
24276_3_167	ERR2909519	4.3.1.2.EA2	2015	Kenya	This study	Global H58 Phylogeny
24276_3_135	ERR2909496	4.3.1.2.EA2	2016	Kenya	This study	Global H58 Phylogeny
22204_7_258	ERR3332591	4.3.1.2.EA3	2015	Kenya	This study	Global H58 Phylogeny
22204_7_243	ERR3332587	4.3.1.2.EA3	2015	Kenya	This study	Global H58 Phylogeny
22306_3_247	ERR3332769	4.3.1.1.EA1	2014	Kenya	This study	Global H58 Phylogeny
22204_7_145	ERR3332555	4.3.1.1.EA1	2016	Kenya	This study	Global H58 Phylogeny
22204_7_223	ERR2525493	4.3.1.2.EA2	2015	Kenya	This study	Global H58 Phylogeny
24276_3_161	ERR2909513	4.3.1.2.EA2	2015	Kenya	This study	Global H58 Phylogeny
22204_7_274	ERR3332596	4.3.1.1.EA1	2014	Kenya	This study	Global H58 Phylogeny
24276_3_256	ERR2909592	4.3.1.1.EA1	2015	Kenya	This study	Global H58 Phylogeny
22204_7_232	ERR3332584	4.3.1.2.EA2	2015	Kenya	This study	Global H58 Phylogeny
22306_3_75	ERR3332648	4.3.1.2.EA2	2013	Kenya	This study	Global H58 Phylogeny
22306_3_38	ERR3332623	4.3.1.1.EA1	2013	Kenya	This study	Global H58 Phylogeny
22306_3_228	ERR3332758	4.3.1.2.EA2	2014	Kenya	This study	Global H58 Phylogeny
22306_3_68	ERR3332643	4.3.1.1.EA1	2014	Kenya	This study	Global H58 Phylogeny
22306_3_55	ERR3332633	4.3.1.1.EA1	2014	Kenya	This study	Global H58 Phylogeny
24276_3_244	ERR2909580	4.3.1.2.EA2	2014	Kenya	This study	Global H58 Phylogeny
22306_3_27	ERR3332617	4.3.1.2.EA3	2015	Kenya	This study	Global H58 Phylogeny
24276_3_163	ERR2909515	4.3.1.2.EA2	2015	Kenya	This study	Global H58 Phylogeny
22306_3_155	ERR3332701	4.3.1.1.EA1	2015	Kenya	This study	Global H58 Phylogeny
22306_3_218	ERR3332750	4.3.1.1.EA1	2015	Kenya	This study	Global H58 Phylogeny
24276_3_248	ERR2909584	4.3.1.2.EA2	2013	Kenya	This study	Global H58 Phylogeny
22306_3_248	ERR3332770	4.3.1.2.EA2	2014	Kenya	This study	Global H58 Phylogeny
22306_3_197	ERR3332737	4.3.1.1.EA1	2014	Kenya	This study	Global H58 Phylogeny
24276_3_197	ERR2909543	4.3.1.2.EA2	2013	Kenya	This study	Global H58 Phylogeny
24276_3_164	ERR2909516	4.3.1.2.EA2	2014	Kenya	This study	Global H58 Phylogeny
24276_3_249	ERR2909585	4.3.1.2.EA2	2013	Kenya	This study	Global H58 Phylogeny
22204_7_207	ERR3332580	4.3.1.2.EA3	2016	Kenya	This study	Global H58 Phylogeny
22204_7_188	ERR3332577	4.3.1.2.EA3	2016	Kenya	This study	Global H58 Phylogeny
22204_7_97	ERR3332539	4.3.1.1.EA1	2016	Kenya	This study	Global H58 Phylogeny
22306_3_126	ERR3332684	4.3.1.2.EA3	2014	Kenya	This study	Global H58 Phylogeny
22306_3_147	ERR3332694	4.3.1.1.EA1	2016	Kenya	This study	Global H58 Phylogeny
22306_3_164	ERR3332709	4.3.1.2.EA2	2015	Kenya	This study	Global H58 Phylogeny
22204_7_193	ERR3332578	4.3.1.2.EA2	2016	Kenya	This study	Global H58 Phylogeny
22306_3_116	ERR3332677	4.3.1.1.EA1	2016	Kenya	This study	Global H58 Phylogeny
24276_3_153	ERR2909506	4.3.1.2.EA2	2015	Kenya	This study	Global H58 Phylogeny
22306_3_96	ERR3332662	4.3.1.2.EA2	2014	Kenya	This study	Global H58 Phylogeny
22306_3_67	ERR3332642	4.3.1.2.EA2	2014	Kenya	This study	Global H58 Phylogeny
22306_3_205	ERR3332744	4.3.1.1.EA1	2013	Kenya	This study	Global H58 Phylogeny
24276_3_277	ERR2909611	4.3.1.1.EA1	2013	Kenya	This study	Global H58 Phylogeny
22306_3_225	ERR3332755	4.3.1.1.EA1	2014	Kenya	This study	Global H58 Phylogeny
22306_3_185	ERR3332727	4.3.1.2.EA2	2014	Kenya	This study	Global H58 Phylogeny
22306_3_66	ERR3332641	4.3.1.1.EA1	2014	Kenya	This study	Global H58 Phylogeny
22204_7_181	ERR3332574	4.3.1.2.EA2	2016	Kenya	This study	Global H58 Phylogeny
22204_7_180	ERR3332573	4.3.1.1.EA1	2016	Kenya	This study	Global H58 Phylogeny
22204_7_104	ERR3332541	4.3.1.2.EA2	2015	Kenya	This study	Global H58 Phylogeny
22306_3_200	ERR3332740	4.3.1.2.EA2	2014	Kenya	This study	Global H58 Phylogeny
22306_3_184	ERR3332726	4.3.1.1.EA1	2014	Kenya	This study	Global H58 Phylogeny
24276_3_180	ERR2909532	4.3.1.1.EA1	2016	Kenya	This study	Global H58 Phylogeny
22306_3_85	ERR3332652	4.3.1.2.EA2	2014	Kenya	This study	Global H58 Phylogeny
24276_3_171	ERR2909523	4.3.1.2.EA2	2015	Kenya	This study	Global H58 Phylogeny
22306_3_57	ERR3332635	4.3.1.2.EA3	2014	Kenya	This study	Global H58 Phylogeny
24276_3_155	ERR2909508	4.3.1.1.EA1	2015	Kenya	This study	Global H58 Phylogeny
22204_7_209	ERR2525483	4.3.1.2.EA2	2015	Kenya	This study	Global H58 Phylogeny
22306_3_204	ERR3332743	4.3.1.2.EA2	2014	Kenya	This study	Global H58 Phylogeny
24276_3_194	ERR2909540	4.3.1.1.EA1	2014	Kenya	This study	Global H58 Phylogeny
24276_3_184	ERR2909536	4.3.1.2.EA2	2016	Kenya	This study	Global H58 Phylogeny
22306_3_92	ERR3332659	4.3.1.2.EA2	2015	Kenya	This study	Global H58 Phylogeny
24276_3_168	ERR2909520	4.3.1.2.EA2	2015	Kenya	This study	Global H58 Phylogeny
24276_3_276	ERR3332782	4.3.1.2.EA2	2016	Kenya	This study	Global H58 Phylogeny
22204_7_142	ERR2525481	4.3.1.1.EA1	2015	Kenya	This study	Global H58 Phylogeny
24276_3_157	ERR2909509	4.3.1.2.EA2	2015	Kenya	This study	Global H58 Phylogeny
24276_3_142	ERR2909503	4.3.1.1.EA1	2015	Kenya	This study	Global H58 Phylogeny
24276_3_177	ERR2909529	4.3.1.2.EA2	2016	Kenya	This study	Global H58 Phylogeny
22306_3_129	ERR3332685	4.3.1.2.EA3	2016	Kenya	This study	Global H58 Phylogeny
24276_3_272	ERR2909608	4.3.1.2.EA2	2016	Kenya	This study	Global H58 Phylogeny
24276_3_150	ERR3332779	4.3.1.1.EA1	2016	Kenya	This study	Global H58 Phylogeny
22204_7_239	ERR3332586	4.3.1.2.EA2	2015	Kenya	This study	Global H58 Phylogeny
22306_3_244	ERR3332766	4.3.1.2.EA3	2016	Kenya	This study	Global H58 Phylogeny
22204_7_185	ERR3332576	4.3.1.1.EA1	2016	Kenya	This study	Global H58 Phylogeny
24276_3_149	ERR3332778	4.3.1.1.EA1	2016	Kenya	This study	Global H58 Phylogeny
22204_7_122	ERR3332548	4.3.1.1.EA1	2015	Kenya	This study	Global H58 Phylogeny
22204_7_262	ERR2525516	4.3.1.2.EA2	2015	Kenya	This study	Global H58 Phylogeny
22204_7_115	ERR3332546	4.3.1.2.EA2	2015	Kenya	This study	Global H58 Phylogeny
24276_3_152	ERR2909505	4.3.1.1.EA1	2015	Kenya	This study	Global H58 Phylogeny
22306_3_253	ERR3332773	4.3.1.2.EA2	2016	Kenya	This study	Global H58 Phylogeny
22306_3_115	ERR3332676	4.3.1.1.EA1	2016	Kenya	This study	Global H58 Phylogeny
24276_3_134	ERR2909495	4.3.1.1.EA1	2016	Kenya	This study	Global H58 Phylogeny
22204_7_107	ERR3332543	4.3.1.2.EA3	2015	Kenya	This study	Global H58 Phylogeny
24276_3_115	ERR2909476	4.3.1.2.EA2	2015	Kenya	This study	Global H58 Phylogeny
24276_3_113	ERR2909474	4.3.1.1.EA1	2015	Kenya	This study	Global H58 Phylogeny
24276_3_143	ERR3332776	4.3.1.2.EA2	2016	Kenya	This study	Global H58 Phylogeny
24276_3_141	ERR2909502	4.3.1.2.EA3	2015	Kenya	This study	Global H58 Phylogeny
24276_3_126	ERR2909487	4.3.1.1.EA1	2016	Kenya	This study	Global H58 Phylogeny
22204_7_261	ERR2525515	4.3.1.1.EA1	2015	Kenya	This study	Global H58 Phylogeny
24276_3_146	ERR3332777	4.3.1.1.EA1	2016	Kenya	This study	Global H58 Phylogeny
22204_7_256	ERR3332589	4.3.1.2.EA2	2015	Kenya	This study	Global H58 Phylogeny
24276_3_162	ERR2909514	4.3.1.2.EA2	2015	Kenya	This study	Global H58 Phylogeny
24276_3_160	ERR2909512	4.3.1.2.EA2	2015	Kenya	This study	Global H58 Phylogeny
22204_7_219	ERR2525491	4.3.1.2.EA3	2015	Kenya	This study	Global H58 Phylogeny
22204_7_95	ERR2525467	4.3.1.1.EA1	2016	Kenya	This study	Global H58 Phylogeny
24276_3_122	ERR2909483	4.3.1.1.EA1	2015	Kenya	This study	Global H58 Phylogeny
22204_7_184	ERR3332575	4.3.1.1.EA1	2016	Kenya	This study	Global H58 Phylogeny
24276_3_247	ERR2909583	4.3.1.2.EA2	2013	Kenya	This study	Global H58 Phylogeny
24276_3_116	ERR2909477	4.3.1.1.EA1	2015	Kenya	This study	Global H58 Phylogeny
22204_7_105	ERR3332542	4.3.1.2.EA2	2015	Kenya	This study	Global H58 Phylogeny
24276_3_129	ERR2909490	4.3.1.2.EA2	2016	Kenya	This study	Global H58 Phylogeny
22306_3_108	ERR3332669	4.3.1.2.EA2	2015	Kenya	This study	Global H58 Phylogeny
22204_7_251	ERR2525508	4.3.1.2.EA3	2015	Kenya	This study	Global H58 Phylogeny
22204_8_178	ERR4921815	4.3.1.1.EA1	2013	Kenya	This study	Global H58 Phylogeny
22204_7_130	ERR3332551	4.3.1.1.EA1	2015	Kenya	This study	Global H58 Phylogeny
22306_3_191	ERR3332731	4.3.1.2.EA2	2013	Kenya	This study	Global H58 Phylogeny
24276_3_278	ERR2909612	4.3.1.2.EA2	2013	Kenya	This study	Global H58 Phylogeny
12045_3_75	ERR485132	4.3.1.3	2006	Unknown	Wong et al. 2016	Global H58 Phylogeny
12045_3_76	ERR485133	4.3.1.3	2006	Unknown	Wong et al. 2016	Global H58 Phylogeny
10492_1_52	ERR352305	4.3.1.3	2011	Unknown	Wong et al. 2016	Global H58 Phylogeny
11642_2_15	ERR422764	4.3.1.3	2010	Unknown	Wong et al. 2016	Global H58 Phylogeny
11642_2_49	ERR422796	4.3.1	2010	Unknown	Wong et al. 2016	Global H58 Phylogeny
11642_2_51	ERR422798	4.3.1	2010	Unknown	Wong et al. 2016	Global H58 Phylogeny
11800_1_9	ERR1017040	4.3.1	2005	Unknown	Wong et al. 2016	Global H58 Phylogeny
12045_3_70	ERR485127	4.3.1	2005	Unknown	Wong et al. 2016	Global H58 Phylogeny
10493_1_22	ERR352447	4.3.1.2	2011	Unknown	Wong et al. 2016	Global H58 Phylogeny
10562_2_18	ERR357773	4.3.1.2	2011	Unknown	Wong et al. 2016	Global H58 Phylogeny
10492_1_15	ERR352268	4.3.1.2	2012	Unknown	Wong et al. 2016	Global H58 Phylogeny
10492_1_23	ERR352276	4.3.1.2	2011	Unknown	Wong et al. 2016	Global H58 Phylogeny
10492_1_33	ERR352286	4.3.1.2	2011	Unknown	Wong et al. 2016	Global H58 Phylogeny
10493_1_49	ERR352474	4.3.1	2011	Unknown	Wong et al. 2016	Global H58 Phylogeny
10541_2_10	ERR352943	4.3.1.2	2011	Unknown	Wong et al. 2016	Global H58 Phylogeny
11642_2_69	ERR422816	4.3.1	2011	Unknown	Wong et al. 2016	Global H58 Phylogeny
11642_2_7	ERR422757	4.3.1	2009	Unknown	Wong et al. 2016	Global H58 Phylogeny
11800_1_15	ERR1017042	4.3.1.1	2005	Unknown	Wong et al. 2016	Global H58 Phylogeny
11800_1_7	ERR1017039	4.3.1.1	2005	Unknown	Wong et al. 2016	Global H58 Phylogeny
10562_2_10	ERR357765	4.3.1.2	2012	Unknown	Wong et al. 2016	Global H58 Phylogeny
10492_1_36	ERR352289	4.3.1.2	2010	Lebanon	Wong et al. 2016	Global H58 Phylogeny
10060_6_85	ERR331382	4.3.1.1	2006	Iraq	Wong et al. 2016	Global H58 Phylogeny
10060_6_86	ERR331383	4.3.1.1	2009	Iraq	Wong et al. 2016	Global H58 Phylogeny
10060_6_87	ERR331384	4.3.1.1	2008	Iraq	Wong et al. 2016	Global H58 Phylogeny
10060_6_88	ERR331385	4.3.1.1	2010	Iraq	Wong et al. 2016	Global H58 Phylogeny
10060_6_89	ERR331386	4.3.1.1	2007	Iraq	Wong et al. 2016	Global H58 Phylogeny
10060_6_90	ERR331387	4.3.1.1	2009	Iraq	Wong et al. 2016	Global H58 Phylogeny
10060_6_91	ERR331388	4.3.1.1	2008	Iraq	Wong et al. 2016	Global H58 Phylogeny
10060_6_92	ERR331389	4.3.1.1	2009	Iraq	Wong et al. 2016	Global H58 Phylogeny
10060_6_93	ERR331390	4.3.1.1	2008	Iraq	Wong et al. 2016	Global H58 Phylogeny
10492_1_73	ERR352326	4.3.1.1	2011	Iraq	Wong et al. 2016	Global H58 Phylogeny
10493_1_84	ERR352509	4.3.1.1	2012	Afghanistan	Wong et al. 2016	Global H58 Phylogeny
10561_2_40	ERR357615	4.3.1.1	2002	Western_Asia	Wong et al. 2016	Global H58 Phylogeny
10593_2_80	ERR360693	4.3.1.1	2008	Palestine	Wong et al. 2016	Global H58 Phylogeny
10492_1_54	ERR352307	4.3.1.1	2011	Pakistan	Wong et al. 2016	Global H58 Phylogeny
10562_2_64	ERR357819	4.3.1.1	2011	Pakistan	Wong et al. 2016	Global H58 Phylogeny
10592_2_10	ERR360458	4.3.1.1	2003	Pakistan	Wong et al. 2016	Global H58 Phylogeny
10592_2_13	ERR360461	4.3.1.2	2003	Pakistan	Wong et al. 2016	Global H58 Phylogeny
10592_2_20	ERR360468	4.3.1.1	2003	Pakistan	Wong et al. 2016	Global H58 Phylogeny
10592_2_28	ERR360476	4.3.1.1	2003	Pakistan	Wong et al. 2016	Global H58 Phylogeny
11800_1_56	ERR1017070	4.3.1.2	2007	Pakistan	Wong et al. 2016	Global H58 Phylogeny
10492_1_86	ERR352339	4.3.1	2011	Pakistan	Wong et al. 2016	Global H58 Phylogeny
10493_1_19	ERR352444	4.3.1.1	2012	Pakistan	Wong et al. 2016	Global H58 Phylogeny
10493_1_27	ERR352452	4.3.1	2011	Pakistan	Wong et al. 2016	Global H58 Phylogeny
10493_1_38	ERR352463	4.3.1.1	2010	Pakistan	Wong et al. 2016	Global H58 Phylogeny
10562_2_33	ERR357788	4.3.1.1	2010	Pakistan	Wong et al. 2016	Global H58 Phylogeny
10562_2_39	ERR357794	4.3.1	2011	Pakistan	Wong et al. 2016	Global H58 Phylogeny
10562_2_62	ERR357817	4.3.1	2011	Pakistan	Wong et al. 2016	Global H58 Phylogeny
10592_2_11	ERR360459	4.3.1	2003	Pakistan	Wong et al. 2016	Global H58 Phylogeny
10592_2_22	ERR360470	4.3.1.2	2003	Pakistan	Wong et al. 2016	Global H58 Phylogeny
10592_2_23	ERR360471	4.3.1	2003	Pakistan	Wong et al. 2016	Global H58 Phylogeny
10592_2_24	ERR360472	4.3.1	2003	Pakistan	Wong et al. 2016	Global H58 Phylogeny
10592_2_26	ERR360474	4.3.1	2003	Pakistan	Wong et al. 2016	Global H58 Phylogeny
10592_2_30	ERR360478	4.3.1	2003	Pakistan	Wong et al. 2016	Global H58 Phylogeny
10592_2_33	ERR360481	4.3.1	2003	Pakistan	Wong et al. 2016	Global H58 Phylogeny
10592_2_9	ERR360457	4.3.1	2003	Pakistan	Wong et al. 2016	Global H58 Phylogeny
11642_2_33	ERR422781	4.3.1.1	2010	Pakistan	Wong et al. 2016	Global H58 Phylogeny
11642_2_56	ERR422803	4.3.1	2011	Pakistan	Wong et al. 2016	Global H58 Phylogeny
11642_2_58	ERR422805	4.3.1.1	2011	Pakistan	Wong et al. 2016	Global H58 Phylogeny
11642_2_86	ERR422833	4.3.1	2012	Pakistan	Wong et al. 2016	Global H58 Phylogeny
11642_2_87	ERR422834	4.3.1	2012	Pakistan	Wong et al. 2016	Global H58 Phylogeny
11800_1_32	ERR1017052	4.3.1	2006	Pakistan	Wong et al. 2016	Global H58 Phylogeny
11800_1_55	ERR1017069	4.3.1.1	2007	Pakistan	Wong et al. 2016	Global H58 Phylogeny
11800_1_88	ERR1017097	4.3.1.1	2009	Pakistan	Wong et al. 2016	Global H58 Phylogeny
10592_2_32	ERR360480	4.3.1.1	2003	Pakistan	Wong et al. 2016	Global H58 Phylogeny
10592_2_4	ERR360452	4.3.1.1	2003	Pakistan	Wong et al. 2016	Global H58 Phylogeny
10561_2_28	ERR357603	4.3.1.1	2011	Nepal	Wong et al. 2016	Global H58 Phylogeny
10592_2_62	ERR360510	4.3.1.3	1999	Nepal	Wong et al. 2016	Global H58 Phylogeny
ERR1079230	ERR1079230	4.3.1.1	2011	Nepal	Thanh et al. 2016	Global H58 Phylogeny
ERR1079291	ERR1079291	4.3.1	2013	Nepal	Thanh et al. 2016	Global H58 Phylogeny
ERR119819	ERR119819	4.3.1.1	2009	Nepal	Thanh et al. 2016	Global H58 Phylogeny
ERR119820	ERR119820	4.3.1.1	2009	Nepal	Thanh et al. 2016	Global H58 Phylogeny
ERR119822	ERR119822	4.3.1.1	2009	Nepal	Thanh et al. 2016	Global H58 Phylogeny
ERR119823	ERR119823	4.3.1.1	2009	Nepal	Thanh et al. 2016	Global H58 Phylogeny
ERR119824	ERR119824	4.3.1.1	2009	Nepal	Thanh et al. 2016	Global H58 Phylogeny
ERR119825	ERR119825	4.3.1.1	2009	Nepal	Thanh et al. 2016	Global H58 Phylogeny
10425_1_2	ERR349332	4.3.1.2	2011	Nepal	Wong et al. 2016	Global H58 Phylogeny
10425_1_3	ERR349333	4.3.1.2	2011	Nepal	Wong et al. 2016	Global H58 Phylogeny
10425_1_6	ERR349336	4.3.1.2	2011	Nepal	Wong et al. 2016	Global H58 Phylogeny
10425_1_9	ERR349339	4.3.1.2	2011	Nepal	Wong et al. 2016	Global H58 Phylogeny
10426_1_6	ERR349528	4.3.1.2	2011	Nepal	Wong et al. 2016	Global H58 Phylogeny
10492_1_38	ERR352291	4.3.1.2	2010	Nepal	Wong et al. 2016	Global H58 Phylogeny
10492_1_85	ERR352338	4.3.1.2	2011	Nepal	Wong et al. 2016	Global H58 Phylogeny
10493_1_20	ERR352445	4.3.1.2	2012	Nepal	Wong et al. 2016	Global H58 Phylogeny
10541_2_28	ERR357453	4.3.1.2	2010	Nepal	Wong et al. 2016	Global H58 Phylogeny
10561_2_1	ERR357576	4.3.1.2	2011	Nepal	Wong et al. 2016	Global H58 Phylogeny
10561_2_10	ERR357585	4.3.1.2	2011	Nepal	Wong et al. 2016	Global H58 Phylogeny
10561_2_12	ERR357587	4.3.1.2	2011	Nepal	Wong et al. 2016	Global H58 Phylogeny
10561_2_13	ERR357588	4.3.1.2	2011	Nepal	Wong et al. 2016	Global H58 Phylogeny
10561_2_14	ERR357589	4.3.1.2	2011	Nepal	Wong et al. 2016	Global H58 Phylogeny
10561_2_15	ERR357590	4.3.1.2	2011	Nepal	Wong et al. 2016	Global H58 Phylogeny
10561_2_19	ERR357594	4.3.1.2	2011	Nepal	Wong et al. 2016	Global H58 Phylogeny
10561_2_26	ERR357601	4.3.1.2	2011	Nepal	Wong et al. 2016	Global H58 Phylogeny
10561_2_27	ERR357602	4.3.1.2	2011	Nepal	Wong et al. 2016	Global H58 Phylogeny
10561_2_3	ERR357578	4.3.1.2	2011	Nepal	Wong et al. 2016	Global H58 Phylogeny
10561_2_31	ERR357606	4.3.1.2	2011	Nepal	Wong et al. 2016	Global H58 Phylogeny
10561_2_33	ERR357608	4.3.1.2	2011	Nepal	Wong et al. 2016	Global H58 Phylogeny
10561_2_38	ERR357613	4.3.1.2	2011	Nepal	Wong et al. 2016	Global H58 Phylogeny
10561_2_39	ERR357614	4.3.1.2	2011	Nepal	Wong et al. 2016	Global H58 Phylogeny
10561_2_44	ERR357619	4.3.1.2	2011	Nepal	Wong et al. 2016	Global H58 Phylogeny
10561_2_45	ERR357620	4.3.1.2	2011	Nepal	Wong et al. 2016	Global H58 Phylogeny
10561_2_46	ERR357621	4.3.1.2	2011	Nepal	Wong et al. 2016	Global H58 Phylogeny
10561_2_50	ERR357625	4.3.1.2	2011	Nepal	Wong et al. 2016	Global H58 Phylogeny
10561_2_51	ERR357626	4.3.1.2	2011	Nepal	Wong et al. 2016	Global H58 Phylogeny
10561_2_53	ERR357628	4.3.1.2	2011	Nepal	Wong et al. 2016	Global H58 Phylogeny
10561_2_54	ERR357629	4.3.1.2	2011	Nepal	Wong et al. 2016	Global H58 Phylogeny
10561_2_57	ERR357632	4.3.1.2	2011	Nepal	Wong et al. 2016	Global H58 Phylogeny
10561_2_58	ERR357633	4.3.1.2	2011	Nepal	Wong et al. 2016	Global H58 Phylogeny
10561_2_59	ERR357634	4.3.1.2	2011	Nepal	Wong et al. 2016	Global H58 Phylogeny
10561_2_62	ERR357637	4.3.1.2	2011	Nepal	Wong et al. 2016	Global H58 Phylogeny
10561_2_63	ERR357638	4.3.1.2	2011	Nepal	Wong et al. 2016	Global H58 Phylogeny
10561_2_64	ERR357639	4.3.1.2	2011	Nepal	Wong et al. 2016	Global H58 Phylogeny
10561_2_8	ERR357583	4.3.1.2	2011	Nepal	Wong et al. 2016	Global H58 Phylogeny
10561_2_9	ERR357584	4.3.1.2	2011	Nepal	Wong et al. 2016	Global H58 Phylogeny
ERR1079231	ERR1079231	4.3.1.2	2011	Nepal	Thanh et al. 2016	Global H58 Phylogeny
ERR1079232	ERR1079232	4.3.1.2	2011	Nepal	Thanh et al. 2016	Global H58 Phylogeny
ERR1079233	ERR1079233	4.3.1.2	2011	Nepal	Thanh et al. 2016	Global H58 Phylogeny
ERR1079234	ERR1079234	4.3.1.2	2012	Nepal	Thanh et al. 2016	Global H58 Phylogeny
ERR1079235	ERR1079235	4.3.1.2	2012	Nepal	Thanh et al. 2016	Global H58 Phylogeny
ERR1079236	ERR1079236	4.3.1.2	2012	Nepal	Thanh et al. 2016	Global H58 Phylogeny
ERR1079237	ERR1079237	4.3.1.2	2012	Nepal	Thanh et al. 2016	Global H58 Phylogeny
ERR1079238	ERR1079238	4.3.1.2	2012	Nepal	Thanh et al. 2016	Global H58 Phylogeny
ERR1079239	ERR1079239	4.3.1.2	2012	Nepal	Thanh et al. 2016	Global H58 Phylogeny
ERR1079240	ERR1079240	4.3.1.2	2012	Nepal	Thanh et al. 2016	Global H58 Phylogeny
ERR1079241	ERR1079241	4.3.1.1	2012	Nepal	Thanh et al. 2016	Global H58 Phylogeny
ERR1079242	ERR1079242	4.3.1.2	2012	Nepal	Thanh et al. 2016	Global H58 Phylogeny
ERR1079243	ERR1079243	4.3.1.1	2012	Nepal	Thanh et al. 2016	Global H58 Phylogeny
ERR1079244	ERR1079244	4.3.1.2	2012	Nepal	Thanh et al. 2016	Global H58 Phylogeny
ERR1079245	ERR1079245	4.3.1.1	2012	Nepal	Thanh et al. 2016	Global H58 Phylogeny
ERR1079246	ERR1079246	4.3.1.2	2012	Nepal	Thanh et al. 2016	Global H58 Phylogeny
ERR1079247	ERR1079247	4.3.1.2	2012	Nepal	Thanh et al. 2016	Global H58 Phylogeny
ERR1079248	ERR1079248	4.3.1.2	2012	Nepal	Thanh et al. 2016	Global H58 Phylogeny
ERR1079249	ERR1079249	4.3.1.1	2012	Nepal	Thanh et al. 2016	Global H58 Phylogeny
ERR1079250	ERR1079250	4.3.1.1	2012	Nepal	Thanh et al. 2016	Global H58 Phylogeny
ERR1079251	ERR1079251	4.3.1.2	2012	Nepal	Thanh et al. 2016	Global H58 Phylogeny
ERR1079253	ERR1079253	4.3.1.2	2012	Nepal	Thanh et al. 2016	Global H58 Phylogeny
ERR1079254	ERR1079254	4.3.1.2	2012	Nepal	Thanh et al. 2016	Global H58 Phylogeny
ERR1079257	ERR1079257	4.3.1.2	2012	Nepal	Thanh et al. 2016	Global H58 Phylogeny
ERR1079258	ERR1079258	4.3.1.2	2012	Nepal	Thanh et al. 2016	Global H58 Phylogeny
ERR1079260	ERR1079260	4.3.1.2	2013	Nepal	Thanh et al. 2016	Global H58 Phylogeny
ERR1079261	ERR1079261	4.3.1.2	2013	Nepal	Thanh et al. 2016	Global H58 Phylogeny
ERR1079264	ERR1079264	4.3.1.2	2013	Nepal	Thanh et al. 2016	Global H58 Phylogeny
ERR1079267	ERR1079267	4.3.1.2	2013	Nepal	Thanh et al. 2016	Global H58 Phylogeny
ERR1079268	ERR1079268	4.3.1.2	2013	Nepal	Thanh et al. 2016	Global H58 Phylogeny
ERR1079269	ERR1079269	4.3.1.2	2013	Nepal	Thanh et al. 2016	Global H58 Phylogeny
ERR1079272	ERR1079272	4.3.1.2	2013	Nepal	Thanh et al. 2016	Global H58 Phylogeny
ERR1079273	ERR1079273	4.3.1.2	2013	Nepal	Thanh et al. 2016	Global H58 Phylogeny
ERR1079274	ERR1079274	4.3.1.2	2013	Nepal	Thanh et al. 2016	Global H58 Phylogeny
ERR1079276	ERR1079276	4.3.1.2	2013	Nepal	Thanh et al. 2016	Global H58 Phylogeny
ERR1079277	ERR1079277	4.3.1.2	2013	Nepal	Thanh et al. 2016	Global H58 Phylogeny
ERR1079282	ERR1079282	4.3.1.2	2013	Nepal	Thanh et al. 2016	Global H58 Phylogeny
ERR1079288	ERR1079288	4.3.1.2	2013	Nepal	Thanh et al. 2016	Global H58 Phylogeny
ERR1079290	ERR1079290	4.3.1.2	2013	Nepal	Thanh et al. 2016	Global H58 Phylogeny
ERR1079296	ERR1079296	4.3.1.2	2014	Nepal	Thanh et al. 2016	Global H58 Phylogeny
ERR1079299	ERR1079299	4.3.1.1	2014	Nepal	Thanh et al. 2016	Global H58 Phylogeny
ERR1079300	ERR1079300	4.3.1.2	2014	Nepal	Thanh et al. 2016	Global H58 Phylogeny
ERR1079303	ERR1079303	4.3.1.2	2014	Nepal	Thanh et al. 2016	Global H58 Phylogeny
ERR1079305	ERR1079305	4.3.1.2	2014	Nepal	Thanh et al. 2016	Global H58 Phylogeny
ERR1079306	ERR1079306	4.3.1.2	2014	Nepal	Thanh et al. 2016	Global H58 Phylogeny
ERR1079307	ERR1079307	4.3.1.2	2014	Nepal	Thanh et al. 2016	Global H58 Phylogeny
ERR1079308	ERR1079308	4.3.1.2	2014	Nepal	Thanh et al. 2016	Global H58 Phylogeny
ERR1079309	ERR1079309	4.3.1.2	2014	Nepal	Thanh et al. 2016	Global H58 Phylogeny
ERR1079310	ERR1079310	4.3.1.2	2013	Nepal	Thanh et al. 2016	Global H58 Phylogeny
11800_1_53	ERR1017067	4.3.1.2	2007	Nepal	Wong et al. 2016	Global H58 Phylogeny
ERR1079263	ERR1079263	4.3.1.2	2013	Nepal	Thanh et al. 2016	Global H58 Phylogeny
ERR1079278	ERR1079278	4.3.1.2	2013	Nepal	Thanh et al. 2016	Global H58 Phylogeny
ERR1079279	ERR1079279	4.3.1.2	2013	Nepal	Thanh et al. 2016	Global H58 Phylogeny
ERR1079281	ERR1079281	4.3.1.2	2013	Nepal	Thanh et al. 2016	Global H58 Phylogeny
ERR1079284	ERR1079284	4.3.1.2	2013	Nepal	Thanh et al. 2016	Global H58 Phylogeny
ERR1079289	ERR1079289	4.3.1.2	2013	Nepal	Thanh et al. 2016	Global H58 Phylogeny
ERR1079294	ERR1079294	4.3.1.2	2013	Nepal	Thanh et al. 2016	Global H58 Phylogeny
ERR1079297	ERR1079297	4.3.1.2	2014	Nepal	Thanh et al. 2016	Global H58 Phylogeny
ERR1079301	ERR1079301	4.3.1.2	2014	Nepal	Thanh et al. 2016	Global H58 Phylogeny
ERR1079302	ERR1079302	4.3.1.2	2014	Nepal	Thanh et al. 2016	Global H58 Phylogeny
ERR586912	ERR586912	4.3.1.2	2013	Nepal	Thanh et al. 2016	Global H58 Phylogeny
ERR586914	ERR586914	4.3.1.2	2013	Nepal	Thanh et al. 2016	Global H58 Phylogeny
ERR586915	ERR586915	4.3.1.2	2013	Nepal	Thanh et al. 2016	Global H58 Phylogeny
ERR586917	ERR586917	4.3.1.2	2013	Nepal	Thanh et al. 2016	Global H58 Phylogeny
ERR586919	ERR586919	4.3.1.2	2013	Nepal	Thanh et al. 2016	Global H58 Phylogeny
ERR586921	ERR586921	4.3.1.2	2013	Nepal	Thanh et al. 2016	Global H58 Phylogeny
10071_3_2	ERR337978	4.3.1.3	2012	Bangladesh	Wong et al. 2016	Global H58 Phylogeny
11800_1_65	ERR1017077	4.3.1.3	2007	Bangladesh	Wong et al. 2016	Global H58 Phylogeny
10060_5_88	ERR331291	4.3.1.3	2011	Bangladesh	Wong et al. 2016	Global H58 Phylogeny
10060_5_91	ERR331294	4.3.1.3	2011	Bangladesh	Wong et al. 2016	Global H58 Phylogeny
10060_5_92	ERR331295	4.3.1.3	2011	Bangladesh	Wong et al. 2016	Global H58 Phylogeny
10060_5_93	ERR331296	4.3.1.1	2008	Bangladesh	Wong et al. 2016	Global H58 Phylogeny
10060_5_94	ERR331297	4.3.1.1	2012	Bangladesh	Wong et al. 2016	Global H58 Phylogeny
10071_3_1	ERR337977	4.3.1.3	2012	Bangladesh	Wong et al. 2016	Global H58 Phylogeny
10071_3_13	ERR337989	4.3.1.1	2012	Bangladesh	Wong et al. 2016	Global H58 Phylogeny
10071_3_17	ERR337993	4.3.1.3	2012	Bangladesh	Wong et al. 2016	Global H58 Phylogeny
10071_3_21	ERR337997	4.3.1.3	2012	Bangladesh	Wong et al. 2016	Global H58 Phylogeny
10492_1_24	ERR352277	4.3.1.3	2011	Bangladesh	Wong et al. 2016	Global H58 Phylogeny
10492_1_40	ERR352293	4.3.1.3	2010	Bangladesh	Wong et al. 2016	Global H58 Phylogeny
10562_2_73	ERR357828	4.3.1.3	2011	Bangladesh	Wong et al. 2016	Global H58 Phylogeny
10592_2_80	ERR360528	4.3.1.3	2003	Bangladesh	Wong et al. 2016	Global H58 Phylogeny
11642_2_60	ERR422807	4.3.1.3	2011	Bangladesh	Wong et al. 2016	Global H58 Phylogeny
11642_2_71	ERR422818	4.3.1.2	2011	Bangladesh	Wong et al. 2016	Global H58 Phylogeny
11642_2_79	ERR422826	4.3.1.3	2012	Bangladesh	Wong et al. 2016	Global H58 Phylogeny
11642_2_77	ERR422824	4.3.1.1	2011	Bangladesh	Wong et al. 2016	Global H58 Phylogeny
10060_5_89	ERR331292	4.3.1.1	2011	Bangladesh	Wong et al. 2016	Global H58 Phylogeny
10060_5_90	ERR331293	4.3.1.1	2011	Bangladesh	Wong et al. 2016	Global H58 Phylogeny
10071_3_11	ERR337987	4.3.1.1	2012	Bangladesh	Wong et al. 2016	Global H58 Phylogeny
10071_3_14	ERR337990	4.3.1.1	2012	Bangladesh	Wong et al. 2016	Global H58 Phylogeny
10071_3_19	ERR337995	4.3.1.1	2012	Bangladesh	Wong et al. 2016	Global H58 Phylogeny
10071_3_8	ERR337984	4.3.1.1	2012	Bangladesh	Wong et al. 2016	Global H58 Phylogeny
10492_1_51	ERR352304	4.3.1.1	2010	Bangladesh	Wong et al. 2016	Global H58 Phylogeny
10492_1_55	ERR352308	4.3.1.1	2011	Bangladesh	Wong et al. 2016	Global H58 Phylogeny
10493_1_43	ERR352468	4.3.1.1	2010	Bangladesh	Wong et al. 2016	Global H58 Phylogeny
10562_2_21	ERR357776	4.3.1.1	2011	Bangladesh	Wong et al. 2016	Global H58 Phylogeny
10562_2_27	ERR357782	4.3.1.1	2010	Bangladesh	Wong et al. 2016	Global H58 Phylogeny
10562_2_37	ERR357792	4.3.1.1	2011	Bangladesh	Wong et al. 2016	Global H58 Phylogeny
10592_2_78	ERR360526	4.3.1.1	2007	Bangladesh	Wong et al. 2016	Global H58 Phylogeny
11642_2_17	ERR422766	4.3.1.1	2010	Bangladesh	Wong et al. 2016	Global H58 Phylogeny
11642_2_2	ERR422752	4.3.1.1	2009	Bangladesh	Wong et al. 2016	Global H58 Phylogeny
11642_2_26	ERR422775	4.3.1.1	2010	Bangladesh	Wong et al. 2016	Global H58 Phylogeny
11642_2_27	ERR422776	4.3.1.1	2010	Bangladesh	Wong et al. 2016	Global H58 Phylogeny
11642_2_53	ERR422800	4.3.1.1	2010	Bangladesh	Wong et al. 2016	Global H58 Phylogeny
11642_2_54	ERR422801	4.3.1.1	2010	Bangladesh	Wong et al. 2016	Global H58 Phylogeny
11642_2_63	ERR422810	4.3.1.1	2011	Bangladesh	Wong et al. 2016	Global H58 Phylogeny
11642_2_65	ERR422812	4.3.1.1	2011	Bangladesh	Wong et al. 2016	Global H58 Phylogeny
11642_2_66	ERR422813	4.3.1.1	2011	Bangladesh	Wong et al. 2016	Global H58 Phylogeny
11642_2_68	ERR422815	4.3.1.1	2011	Bangladesh	Wong et al. 2016	Global H58 Phylogeny
11642_2_82	ERR422829	4.3.1.1	2012	Bangladesh	Wong et al. 2016	Global H58 Phylogeny
11642_2_84	ERR422831	4.3.1.1	2012	Bangladesh	Wong et al. 2016	Global H58 Phylogeny
11800_1_57	ERR1017071	4.3.1.1	2007	Bangladesh	Wong et al. 2016	Global H58 Phylogeny
11800_1_58	ERR1017072	4.3.1.1	2007	Bangladesh	Wong et al. 2016	Global H58 Phylogeny
11800_1_77	ERR1017087	4.3.1.1	2008	Bangladesh	Wong et al. 2016	Global H58 Phylogeny
11800_1_79	ERR1017089	4.3.1.1	2008	Bangladesh	Wong et al. 2016	Global H58 Phylogeny
12045_3_81	ERR485138	4.3.1.1	2006	Bangladesh	Wong et al. 2016	Global H58 Phylogeny
10071_3_20	ERR337996	4.3.1.2	2012	Bangladesh	Wong et al. 2016	Global H58 Phylogeny
10492_1_26	ERR352279	4.3.1.1	2010	Myanmar(Burma)	Wong et al. 2016	Global H58 Phylogeny
10562_2_69	ERR357824	4.3.1.1	2011	Myanmar(Burma)	Wong et al. 2016	Global H58 Phylogeny
10349_1_24	ERR343272	4.3.1.1	2006	India	Wong et al. 2016	Global H58 Phylogeny
10349_1_91	ERR343339	4.3.1.2	2002	India	Wong et al. 2016	Global H58 Phylogeny
10492_1_11	ERR352264	4.3.1.1	2012	India	Wong et al. 2016	Global H58 Phylogeny
10493_1_31	ERR352456	4.3.1.1	2011	India	Wong et al. 2016	Global H58 Phylogeny
10562_2_66	ERR357821	4.3.1.1	2011	India	Wong et al. 2016	Global H58 Phylogeny
10562_2_8	ERR357763	4.3.1.1	2012	India	Wong et al. 2016	Global H58 Phylogeny
9475_4_54	ERR279350	4.3.1.2	2006	India	Wong et al. 2016	Global H58 Phylogeny
9475_4_55	ERR279351	4.3.1.2	2006	India	Wong et al. 2016	Global H58 Phylogeny
10349_1_40	ERR343288	4.3.1.2	2008	India	Wong et al. 2016	Global H58 Phylogeny
10349_1_59	ERR343307	4.3.1.2	2010	India	Wong et al. 2016	Global H58 Phylogeny
10349_1_79	ERR343327	4.3.1.1	2012	India	Wong et al. 2016	Global H58 Phylogeny
10492_1_20	ERR352273	4.3.1.2	2011	India	Wong et al. 2016	Global H58 Phylogeny
10492_1_21	ERR352274	4.3.1.1	2011	India	Wong et al. 2016	Global H58 Phylogeny
10492_1_27	ERR352280	4.3.1.1	2011	India	Wong et al. 2016	Global H58 Phylogeny
10492_1_28	ERR352281	4.3.1	2011	India	Wong et al. 2016	Global H58 Phylogeny
10492_1_30	ERR352283	4.3.1.2	2011	India	Wong et al. 2016	Global H58 Phylogeny
10492_1_74	ERR352327	4.3.1	2011	India	Wong et al. 2016	Global H58 Phylogeny
10493_1_18	ERR352443	4.3.1	2012	India	Wong et al. 2016	Global H58 Phylogeny
10493_1_21	ERR352446	4.3.1	2012	India	Wong et al. 2016	Global H58 Phylogeny
10493_1_24	ERR352449	4.3.1	2011	India	Wong et al. 2016	Global H58 Phylogeny
10493_1_46	ERR352471	4.3.1.2	2011	India	Wong et al. 2016	Global H58 Phylogeny
10493_1_80	ERR352505	4.3.1.1	2011	India	Wong et al. 2016	Global H58 Phylogeny
10493_1_81	ERR352506	4.3.1.1	2011	India	Wong et al. 2016	Global H58 Phylogeny
10541_2_11	ERR352944	4.3.1.2	2011	India	Wong et al. 2016	Global H58 Phylogeny
10541_2_15	ERR352948	4.3.1.1	2011	India	Wong et al. 2016	Global H58 Phylogeny
10541_2_16	ERR352949	4.3.1.2	2011	India	Wong et al. 2016	Global H58 Phylogeny
10541_2_21	ERR352954	4.3.1.2	2011	India	Wong et al. 2016	Global H58 Phylogeny
10541_2_7	ERR357444	4.3.1.2	2011	India	Wong et al. 2016	Global H58 Phylogeny
10561_2_55	ERR357630	4.3.1.2	2009	India	Wong et al. 2016	Global H58 Phylogeny
10561_2_66	ERR357641	4.3.1.2	2010	India	Wong et al. 2016	Global H58 Phylogeny
10562_2_11	ERR357766	4.3.1.2	2012	India	Wong et al. 2016	Global H58 Phylogeny
10562_2_28	ERR357783	4.3.1.2	2010	India	Wong et al. 2016	Global H58 Phylogeny
10562_2_29	ERR357784	4.3.1.2	2011	India	Wong et al. 2016	Global H58 Phylogeny
10562_2_36	ERR357791	4.3.1.1	2011	India	Wong et al. 2016	Global H58 Phylogeny
10562_2_40	ERR357795	4.3.1.1	2011	India	Wong et al. 2016	Global H58 Phylogeny
10562_2_41	ERR357796	4.3.1.1	2011	India	Wong et al. 2016	Global H58 Phylogeny
10562_2_42	ERR357797	4.3.1.2	2011	India	Wong et al. 2016	Global H58 Phylogeny
10562_2_60	ERR357815	4.3.1.1	2011	India	Wong et al. 2016	Global H58 Phylogeny
10562_2_67	ERR357822	4.3.1.2	2011	India	Wong et al. 2016	Global H58 Phylogeny
10562_2_75	ERR357830	4.3.1.1	2011	India	Wong et al. 2016	Global H58 Phylogeny
10593_2_26	ERR360639	4.3.1.2	2000	India	Wong et al. 2016	Global H58 Phylogeny
8616_4_37	ERR420413	4.3.1.2	2009	India	Wong et al. 2016	Global H58 Phylogeny
8616_4_38	ERR420414	4.3.1.2	2009	India	Wong et al. 2016	Global H58 Phylogeny
8616_4_39	ERR420415	4.3.1.1	2009	India	Wong et al. 2016	Global H58 Phylogeny
8616_4_44	ERR420420	4.3.1.2	2010	India	Wong et al. 2016	Global H58 Phylogeny
8616_4_45	ERR420421	4.3.1.2	2010	India	Wong et al. 2016	Global H58 Phylogeny
8616_4_46	ERR420422	4.3.1.2	2011	India	Wong et al. 2016	Global H58 Phylogeny
8616_4_47	ERR420423	4.3.1.2	2011	India	Wong et al. 2016	Global H58 Phylogeny
8616_4_49	ERR420425	4.3.1.1	2011	India	Wong et al. 2016	Global H58 Phylogeny
8616_4_54	ERR420430	4.3.1.2	2009	India	Wong et al. 2016	Global H58 Phylogeny
8616_4_55	ERR420431	4.3.1.2	2009	India	Wong et al. 2016	Global H58 Phylogeny
9475_4_48	ERR279344	4.3.1	2006	India	Wong et al. 2016	Global H58 Phylogeny
9475_4_49	ERR279345	4.3.1	2007	India	Wong et al. 2016	Global H58 Phylogeny
9475_4_50	ERR279346	4.3.1.2	2005	India	Wong et al. 2016	Global H58 Phylogeny
9475_4_51	ERR279347	4.3.1.2	2005	India	Wong et al. 2016	Global H58 Phylogeny
9475_4_52	ERR279348	4.3.1.1	2005	India	Wong et al. 2016	Global H58 Phylogeny
9475_4_53	ERR279349	4.3.1.1	2005	India	Wong et al. 2016	Global H58 Phylogeny
11642_2_21	ERR422770	4.3.1.2	2010	India	Wong et al. 2016	Global H58 Phylogeny
11642_2_32	ERR422780	4.3.1	2010	India	Wong et al. 2016	Global H58 Phylogeny
11642_2_81	ERR422828	4.3.1	2012	India	Wong et al. 2016	Global H58 Phylogeny
11800_1_48	ERR1017064	4.3.1.2	2007	India	Wong et al. 2016	Global H58 Phylogeny
11800_1_54	ERR1017068	4.3.1	2007	India	Wong et al. 2016	Global H58 Phylogeny
11800_1_63	ERR1017075	4.3.1	2007	India	Wong et al. 2016	Global H58 Phylogeny
11800_1_72	ERR1017083	4.3.1.2	2008	India	Wong et al. 2016	Global H58 Phylogeny
11800_1_80	ERR1017090	4.3.1	2008	Kuwait_India	Wong et al. 2016	Global H58 Phylogeny
11800_1_82	ERR1017092	4.3.1	2008	Kuwait_India	Wong et al. 2016	Global H58 Phylogeny
10562_2_31	ERR357786	4.3.1.2	2011	India	Wong et al. 2016	Global H58 Phylogeny
10349_1_10	ERR343258	4.3.1.2	2003	India	Wong et al. 2016	Global H58 Phylogeny
10349_1_55	ERR343303	4.3.1.2	2010	India	Wong et al. 2016	Global H58 Phylogeny
10492_1_17	ERR352270	4.3.1.2	2012	India	Wong et al. 2016	Global H58 Phylogeny
10493_1_30	ERR352455	4.3.1.2	2011	India	Wong et al. 2016	Global H58 Phylogeny
11642_2_1	ERR422751	4.3.1.2	2009	India	Wong et al. 2016	Global H58 Phylogeny
11642_2_13	ERR422762	4.3.1.2	2010	India	Wong et al. 2016	Global H58 Phylogeny
11642_2_16	ERR422765	4.3.1.2	2010	India	Wong et al. 2016	Global H58 Phylogeny
11642_2_67	ERR422814	4.3.1.2	2011	India	Wong et al. 2016	Global H58 Phylogeny
10349_1_14	ERR343262	4.3.1.2	2004	India	Wong et al. 2016	Global H58 Phylogeny
10349_1_23	ERR343271	4.3.1.2	2006	India	Wong et al. 2016	Global H58 Phylogeny
10349_1_25	ERR343273	4.3.1.2	2006	India	Wong et al. 2016	Global H58 Phylogeny
10349_1_46	ERR343294	4.3.1.2	2009	India	Wong et al. 2016	Global H58 Phylogeny
10349_1_61	ERR343309	4.3.1.2	2010	India	Wong et al. 2016	Global H58 Phylogeny
10349_1_67	ERR343315	4.3.1.2	2011	India	Wong et al. 2016	Global H58 Phylogeny
10349_1_71	ERR343319	4.3.1.2	2011	India	Wong et al. 2016	Global H58 Phylogeny
10349_1_72	ERR343320	4.3.1.2	2011	India	Wong et al. 2016	Global H58 Phylogeny
10349_1_74	ERR343322	4.3.1.1	2012	India	Wong et al. 2016	Global H58 Phylogeny
10349_1_75	ERR343323	4.3.1.2	2012	India	Wong et al. 2016	Global H58 Phylogeny
10492_1_12	ERR352265	4.3.1.2	2012	India	Wong et al. 2016	Global H58 Phylogeny
10492_1_18	ERR352271	4.3.1.2	2011	India	Wong et al. 2016	Global H58 Phylogeny
10492_1_22	ERR352275	4.3.1	2011	India	Wong et al. 2016	Global H58 Phylogeny
10492_1_42	ERR352295	4.3.1.2	2011	India	Wong et al. 2016	Global H58 Phylogeny
10492_1_44	ERR352297	4.3.1.2	2011	India	Wong et al. 2016	Global H58 Phylogeny
10492_1_72	ERR352325	4.3.1.2	2011	India	Wong et al. 2016	Global H58 Phylogeny
10492_1_83	ERR352336	4.3.1	2011	India	Wong et al. 2016	Global H58 Phylogeny
10493_1_14	ERR352439	4.3.1.2	2011	India	Wong et al. 2016	Global H58 Phylogeny
10493_1_23	ERR352448	4.3.1.2	2011	India	Wong et al. 2016	Global H58 Phylogeny
10493_1_33	ERR352458	4.3.1.2	2011	India	Wong et al. 2016	Global H58 Phylogeny
10493_1_39	ERR352464	4.3.1.2	2011	India	Wong et al. 2016	Global H58 Phylogeny
10493_1_79	ERR352504	4.3.1.2	2011	India	Wong et al. 2016	Global H58 Phylogeny
10541_2_13	ERR352946	4.3.1.2	2011	India	Wong et al. 2016	Global H58 Phylogeny
10541_2_18	ERR352951	4.3.1	2011	India	Wong et al. 2016	Global H58 Phylogeny
10541_2_20	ERR352953	4.3.1.2	2011	India	Wong et al. 2016	Global H58 Phylogeny
10541_2_9	ERR357446	4.3.1.2	2011	India	Wong et al. 2016	Global H58 Phylogeny
10561_2_6	ERR357581	4.3.1	2011	India	Wong et al. 2016	Global H58 Phylogeny
10561_2_61	ERR357636	4.3.1	2010	India	Wong et al. 2016	Global H58 Phylogeny
10562_2_30	ERR357785	4.3.1.2	2011	India	Wong et al. 2016	Global H58 Phylogeny
10562_2_58	ERR357813	4.3.1.2	2011	India	Wong et al. 2016	Global H58 Phylogeny
10562_2_59	ERR357814	4.3.1.2	2011	India	Wong et al. 2016	Global H58 Phylogeny
10562_2_74	ERR357829	4.3.1	2011	India	Wong et al. 2016	Global H58 Phylogeny
10562_2_81	ERR357836	4.3.1.2	2011	India	Wong et al. 2016	Global H58 Phylogeny
10562_2_83	ERR357838	4.3.1.2	2011	India	Wong et al. 2016	Global H58 Phylogeny
8616_4_53	ERR420429	4.3.1.1	2009	India	Wong et al. 2016	Global H58 Phylogeny
8616_4_56	ERR420432	4.3.1.1	2009	India	Wong et al. 2016	Global H58 Phylogeny
11642_2_39	ERR422787	4.3.1.2	2010	India	Wong et al. 2016	Global H58 Phylogeny
11642_2_70	ERR422817	4.3.1.1	2011	India	Wong et al. 2016	Global H58 Phylogeny
11642_2_72	ERR422819	4.3.1	2011	India	Wong et al. 2016	Global H58 Phylogeny
11800_1_62	ERR1017074	4.3.1.2	2007	India	Wong et al. 2016	Global H58 Phylogeny
11800_1_85	ERR1017094	4.3.1.2	2008	India	Wong et al. 2016	Global H58 Phylogeny
10349_1_34	ERR343282	4.3.1.2	2008	India	Wong et al. 2016	Global H58 Phylogeny
10349_1_52	ERR343300	4.3.1.2	2010	India	Wong et al. 2016	Global H58 Phylogeny
10492_1_13	ERR352266	4.3.1.2	2012	India	Wong et al. 2016	Global H58 Phylogeny
10492_1_25	ERR352278	4.3.1.2	2010	India	Wong et al. 2016	Global H58 Phylogeny
10492_1_31	ERR352284	4.3.1.2	2011	India	Wong et al. 2016	Global H58 Phylogeny
10492_1_43	ERR352296	4.3.1.2	2011	India	Wong et al. 2016	Global H58 Phylogeny
10492_1_6	ERR352259	4.3.1.2	2011	India	Wong et al. 2016	Global H58 Phylogeny
10492_1_82	ERR352335	4.3.1.2	2012	India	Wong et al. 2016	Global H58 Phylogeny
10493_1_9	ERR352434	4.3.1.2	2011	India	Wong et al. 2016	Global H58 Phylogeny
10562_2_13	ERR357768	4.3.1.2	2011	India	Wong et al. 2016	Global H58 Phylogeny
10562_2_32	ERR357787	4.3.1.2	2011	India	Wong et al. 2016	Global H58 Phylogeny
10562_2_34	ERR357789	4.3.1.2	2010	India	Wong et al. 2016	Global H58 Phylogeny
10562_2_79	ERR357834	4.3.1.2	2012	India	Wong et al. 2016	Global H58 Phylogeny
8616_4_41	ERR420417	4.3.1.2	2009	India	Wong et al. 2016	Global H58 Phylogeny
8616_4_48	ERR420424	4.3.1.2	2011	India	Wong et al. 2016	Global H58 Phylogeny
8616_4_50	ERR420426	4.3.1.2	2011	India	Wong et al. 2016	Global H58 Phylogeny
8616_4_51	ERR420427	4.3.1.2	2011	India	Wong et al. 2016	Global H58 Phylogeny
8616_4_58	ERR420434	4.3.1.2	2011	India	Wong et al. 2016	Global H58 Phylogeny
11642_2_57	ERR422804	4.3.1.2	2011	India	Wong et al. 2016	Global H58 Phylogeny
10492_1_76	ERR352329	4.3.1.2	2011	India	Wong et al. 2016	Global H58 Phylogeny
10349_1_54	ERR343302	4.3.1.1	2010	India	Wong et al. 2016	Global H58 Phylogeny
10492_1_19	ERR352272	4.3.1.1	2011	India	Wong et al. 2016	Global H58 Phylogeny
10562_2_65	ERR357820	4.3.1.1	2011	India	Wong et al. 2016	Global H58 Phylogeny
11642_2_10	ERR422759	4.3.1.1	2009	India	Wong et al. 2016	Global H58 Phylogeny
10493_1_41	ERR352466	4.3.1.1	2011	India	Wong et al. 2016	Global H58 Phylogeny
10060_6_28	ERR331325	4.3.1.1	2009	Laos	Wong et al. 2016	Global H58 Phylogeny
10060_6_33	ERR331330	4.3.1.1	2010	Laos	Wong et al. 2016	Global H58 Phylogeny
10060_6_36	ERR331333	4.3.1.1	2003	Laos	Wong et al. 2016	Global H58 Phylogeny
10060_6_38	ERR331335	4.3.1.1	2003	Laos	Wong et al. 2016	Global H58 Phylogeny
10060_6_39	ERR331336	4.3.1.1	2003	Laos	Wong et al. 2016	Global H58 Phylogeny
10060_6_4	ERR331301	4.3.1.1	2008	Laos	Wong et al. 2016	Global H58 Phylogeny
10060_6_47	ERR331344	4.3.1.1	2003	Laos	Wong et al. 2016	Global H58 Phylogeny
10060_6_49	ERR331346	4.3.1.1	2003	Laos	Wong et al. 2016	Global H58 Phylogeny
10060_6_50	ERR331347	4.3.1.1	2003	Laos	Wong et al. 2016	Global H58 Phylogeny
10060_6_55	ERR331352	4.3.1.1	2004	Laos	Wong et al. 2016	Global H58 Phylogeny
10209_5_28	ERR340784	4.3.1.1	2001	Laos	Wong et al. 2016	Global H58 Phylogeny
10209_5_31	ERR340787	4.3.1.1	2002	Laos	Wong et al. 2016	Global H58 Phylogeny
10209_5_33	ERR340789	4.3.1.1	2002	Laos	Wong et al. 2016	Global H58 Phylogeny
10209_5_34	ERR340790	4.3.1.1	2002	Laos	Wong et al. 2016	Global H58 Phylogeny
10209_5_35	ERR340791	4.3.1.1	2002	Laos	Wong et al. 2016	Global H58 Phylogeny
10209_5_38	ERR340794	4.3.1.1	2002	Laos	Wong et al. 2016	Global H58 Phylogeny
10209_5_39	ERR340795	4.3.1.1	2002	Laos	Wong et al. 2016	Global H58 Phylogeny
10209_5_41	ERR340797	4.3.1.1	2002	Laos	Wong et al. 2016	Global H58 Phylogeny
10209_5_43	ERR340799	4.3.1.1	2002	Laos	Wong et al. 2016	Global H58 Phylogeny
10209_5_44	ERR340800	4.3.1.1	2002	Laos	Wong et al. 2016	Global H58 Phylogeny
10209_5_46	ERR340802	4.3.1.1	2000	Laos	Wong et al. 2016	Global H58 Phylogeny
10209_5_50	ERR340806	4.3.1.1	2002	Laos	Wong et al. 2016	Global H58 Phylogeny
10209_5_51	ERR340807	4.3.1.1	2000	Laos	Wong et al. 2016	Global H58 Phylogeny
10209_5_53	ERR340809	4.3.1.1	2000	Laos	Wong et al. 2016	Global H58 Phylogeny
10209_5_58	ERR340812	4.3.1.1	2003	Laos	Wong et al. 2016	Global H58 Phylogeny
10209_5_61	ERR340815	4.3.1.1	2000	Laos	Wong et al. 2016	Global H58 Phylogeny
10592_2_56	ERR360504	4.3.1.1	2002	Laos	Wong et al. 2016	Global H58 Phylogeny
10060_6_31	ERR331328	4.3.1.1	2008	Laos	Wong et al. 2016	Global H58 Phylogeny
10060_6_54	ERR331351	4.3.1.1	2004	Laos	Wong et al. 2016	Global H58 Phylogeny
10425_1_43	ERR349373	4.3.1.1	1997	Vietnam	Wong et al. 2016	Global H58 Phylogeny
10426_1_34	ERR349556	4.3.1.1	1997	Vietnam	Wong et al. 2016	Global H58 Phylogeny
10426_1_64	ERR349585	4.3.1.1	1997	Vietnam	Wong et al. 2016	Global H58 Phylogeny
10540_1_55	ERR352652	4.3.1.1	1997	Vietnam	Wong et al. 2016	Global H58 Phylogeny
10540_1_57	ERR352654	4.3.1.1	1997	Vietnam	Wong et al. 2016	Global H58 Phylogeny
10540_1_65	ERR352663	4.3.1.1	1998	Vietnam	Wong et al. 2016	Global H58 Phylogeny
10540_1_67	ERR352667	4.3.1.1	1997	Vietnam	Wong et al. 2016	Global H58 Phylogeny
10425_1_1	ERR349331	4.3.1.1	1994	Vietnam	Wong et al. 2016	Global H58 Phylogeny
10425_1_11	ERR349341	4.3.1.1	1995	Vietnam	Wong et al. 2016	Global H58 Phylogeny
10425_1_15	ERR349345	4.3.1.1	1996	Vietnam	Wong et al. 2016	Global H58 Phylogeny
10425_1_16	ERR349346	4.3.1.1	1995	Vietnam	Wong et al. 2016	Global H58 Phylogeny
10425_1_17	ERR349347	4.3.1.1	1994	Vietnam	Wong et al. 2016	Global H58 Phylogeny
10425_1_18	ERR349348	4.3.1.1	1995	Vietnam	Wong et al. 2016	Global H58 Phylogeny
10425_1_19	ERR349349	4.3.1.1	1996	Vietnam	Wong et al. 2016	Global H58 Phylogeny
10425_1_20	ERR349350	4.3.1.1	1996	Vietnam	Wong et al. 2016	Global H58 Phylogeny
10425_1_23	ERR349353	4.3.1.1	1995	Vietnam	Wong et al. 2016	Global H58 Phylogeny
10425_1_24	ERR349354	4.3.1.1	1995	Vietnam	Wong et al. 2016	Global H58 Phylogeny
10425_1_26	ERR349356	4.3.1.1	1996	Vietnam	Wong et al. 2016	Global H58 Phylogeny
10425_1_27	ERR349357	4.3.1.1	1995	Vietnam	Wong et al. 2016	Global H58 Phylogeny
10425_1_29	ERR349359	4.3.1.1	1994	Vietnam	Wong et al. 2016	Global H58 Phylogeny
10425_1_30	ERR349360	4.3.1.1	1995	Vietnam	Wong et al. 2016	Global H58 Phylogeny
10425_1_31	ERR349361	4.3.1.1	1996	Vietnam	Wong et al. 2016	Global H58 Phylogeny
10425_1_33	ERR349363	4.3.1.1	1996	Vietnam	Wong et al. 2016	Global H58 Phylogeny
10425_1_34	ERR349364	4.3.1.1	1994	Vietnam	Wong et al. 2016	Global H58 Phylogeny
10425_1_37	ERR349367	4.3.1.1	1995	Vietnam	Wong et al. 2016	Global H58 Phylogeny
10425_1_4	ERR349334	4.3.1.1	1994	Vietnam	Wong et al. 2016	Global H58 Phylogeny
10425_1_42	ERR349372	4.3.1.1	1994	Vietnam	Wong et al. 2016	Global H58 Phylogeny
10425_1_45	ERR349375	4.3.1.1	1993	Vietnam	Wong et al. 2016	Global H58 Phylogeny
10425_1_48	ERR349378	4.3.1.1	1997	Vietnam	Wong et al. 2016	Global H58 Phylogeny
10425_1_51	ERR349381	4.3.1.1	1993	Vietnam	Wong et al. 2016	Global H58 Phylogeny
10425_1_55	ERR349385	4.3.1.1	1994	Vietnam	Wong et al. 2016	Global H58 Phylogeny
10425_1_57	ERR349387	4.3.1.1	1994	Vietnam	Wong et al. 2016	Global H58 Phylogeny
10425_1_58	ERR349388	4.3.1.1	1997	Vietnam	Wong et al. 2016	Global H58 Phylogeny
10425_1_62	ERR349392	4.3.1.1	1994	Vietnam	Wong et al. 2016	Global H58 Phylogeny
10425_1_7	ERR349337	4.3.1.1	1994	Vietnam	Wong et al. 2016	Global H58 Phylogeny
10425_1_73	ERR349403	4.3.1.1	1994	Vietnam	Wong et al. 2016	Global H58 Phylogeny
10425_1_8	ERR349338	4.3.1.1	1995	Vietnam	Wong et al. 2016	Global H58 Phylogeny
10426_1_1	ERR349523	4.3.1.1	1994	Vietnam	Wong et al. 2016	Global H58 Phylogeny
10426_1_10	ERR349532	4.3.1.1	1994	Vietnam	Wong et al. 2016	Global H58 Phylogeny
10426_1_11	ERR349533	4.3.1.1	1996	Vietnam	Wong et al. 2016	Global H58 Phylogeny
10426_1_12	ERR349534	4.3.1.1	1995	Vietnam	Wong et al. 2016	Global H58 Phylogeny
10426_1_13	ERR349535	4.3.1.1	1994	Vietnam	Wong et al. 2016	Global H58 Phylogeny
10426_1_14	ERR349536	4.3.1.1	1995	Vietnam	Wong et al. 2016	Global H58 Phylogeny
10426_1_16	ERR349538	4.3.1.1	1995	Vietnam	Wong et al. 2016	Global H58 Phylogeny
10426_1_17	ERR349539	4.3.1.1	1994	Vietnam	Wong et al. 2016	Global H58 Phylogeny
10426_1_19	ERR349541	4.3.1.1	1995	Vietnam	Wong et al. 2016	Global H58 Phylogeny
10426_1_2	ERR349524	4.3.1.1	1994	Vietnam	Wong et al. 2016	Global H58 Phylogeny
10426_1_21	ERR349543	4.3.1.1	1996	Vietnam	Wong et al. 2016	Global H58 Phylogeny
10426_1_23	ERR349545	4.3.1.1	1995	Vietnam	Wong et al. 2016	Global H58 Phylogeny
10426_1_24	ERR349546	4.3.1.1	1994	Vietnam	Wong et al. 2016	Global H58 Phylogeny
10426_1_25	ERR349547	4.3.1.1	1995	Vietnam	Wong et al. 2016	Global H58 Phylogeny
10426_1_26	ERR349548	4.3.1.1	1996	Vietnam	Wong et al. 2016	Global H58 Phylogeny
10426_1_27	ERR349549	4.3.1.1	1995	Vietnam	Wong et al. 2016	Global H58 Phylogeny
10426_1_28	ERR349550	4.3.1.1	1994	Vietnam	Wong et al. 2016	Global H58 Phylogeny
10426_1_29	ERR349551	4.3.1.1	1995	Vietnam	Wong et al. 2016	Global H58 Phylogeny
10426_1_30	ERR349552	4.3.1.1	1994	Vietnam	Wong et al. 2016	Global H58 Phylogeny
10426_1_31	ERR349553	4.3.1.1	1995	Vietnam	Wong et al. 2016	Global H58 Phylogeny
10426_1_35	ERR349557	4.3.1.1	1994	Vietnam	Wong et al. 2016	Global H58 Phylogeny
10426_1_36	ERR349558	4.3.1.1	1997	Vietnam	Wong et al. 2016	Global H58 Phylogeny
10426_1_38	ERR349560	4.3.1.1	1994	Vietnam	Wong et al. 2016	Global H58 Phylogeny
10426_1_40	ERR349562	4.3.1.1	1997	Vietnam	Wong et al. 2016	Global H58 Phylogeny
10426_1_41	ERR349563	4.3.1.1	1995	Vietnam	Wong et al. 2016	Global H58 Phylogeny
10426_1_42	ERR349564	4.3.1.1	1998	Vietnam	Wong et al. 2016	Global H58 Phylogeny
10426_1_47	ERR349568	4.3.1.1	1997	Vietnam	Wong et al. 2016	Global H58 Phylogeny
10426_1_49	ERR349570	4.3.1.1	1993	Vietnam	Wong et al. 2016	Global H58 Phylogeny
10426_1_51	ERR349572	4.3.1.1	1997	Vietnam	Wong et al. 2016	Global H58 Phylogeny
10426_1_52	ERR349573	4.3.1.1	1997	Vietnam	Wong et al. 2016	Global H58 Phylogeny
10426_1_57	ERR349578	4.3.1.1	1994	Vietnam	Wong et al. 2016	Global H58 Phylogeny
10426_1_58	ERR349579	4.3.1.1	1995	Vietnam	Wong et al. 2016	Global H58 Phylogeny
10426_1_61	ERR349582	4.3.1.1	1997	Vietnam	Wong et al. 2016	Global H58 Phylogeny
10426_1_62	ERR349583	4.3.1.1	1994	Vietnam	Wong et al. 2016	Global H58 Phylogeny
10426_1_63	ERR349584	4.3.1.1	1995	Vietnam	Wong et al. 2016	Global H58 Phylogeny
10426_1_67	ERR349588	4.3.1.1	1994	Vietnam	Wong et al. 2016	Global H58 Phylogeny
10426_1_69	ERR349590	4.3.1.1	1993	Vietnam	Wong et al. 2016	Global H58 Phylogeny
10426_1_70	ERR349591	4.3.1.1	1994	Vietnam	Wong et al. 2016	Global H58 Phylogeny
10426_1_71	ERR349592	4.3.1.1	1994	Vietnam	Wong et al. 2016	Global H58 Phylogeny
10426_1_72	ERR349593	4.3.1.1	1994	Vietnam	Wong et al. 2016	Global H58 Phylogeny
10426_1_74	ERR349595	4.3.1.1	1994	Vietnam	Wong et al. 2016	Global H58 Phylogeny
10426_1_76	ERR349597	4.3.1.1	1994	Vietnam	Wong et al. 2016	Global H58 Phylogeny
10426_1_78	ERR349599	4.3.1.1	1994	Vietnam	Wong et al. 2016	Global H58 Phylogeny
10426_1_79	ERR349600	4.3.1.1	1994	Vietnam	Wong et al. 2016	Global H58 Phylogeny
10426_1_80	ERR349601	4.3.1.1	1994	Vietnam	Wong et al. 2016	Global H58 Phylogeny
10426_1_81	ERR349602	4.3.1.1	1994	Vietnam	Wong et al. 2016	Global H58 Phylogeny
10426_1_82	ERR349603	4.3.1.1	1994	Vietnam	Wong et al. 2016	Global H58 Phylogeny
10426_1_84	ERR349605	4.3.1.1	1994	Vietnam	Wong et al. 2016	Global H58 Phylogeny
10426_1_85	ERR349606	4.3.1.1	1994	Vietnam	Wong et al. 2016	Global H58 Phylogeny
10426_1_88	ERR349609	4.3.1.1	1994	Vietnam	Wong et al. 2016	Global H58 Phylogeny
10426_1_9	ERR349531	4.3.1.1	1995	Vietnam	Wong et al. 2016	Global H58 Phylogeny
10426_1_92	ERR349613	4.3.1.1	1994	Vietnam	Wong et al. 2016	Global H58 Phylogeny
10426_1_94	ERR349615	4.3.1.1	1994	Vietnam	Wong et al. 2016	Global H58 Phylogeny
10426_1_95	ERR349616	4.3.1.1	1994	Vietnam	Wong et al. 2016	Global H58 Phylogeny
10426_1_96	ERR349617	4.3.1.1	1994	Vietnam	Wong et al. 2016	Global H58 Phylogeny
10540_1_10	ERR352607	4.3.1.1	1995	Vietnam	Wong et al. 2016	Global H58 Phylogeny
10540_1_11	ERR352608	4.3.1.1	1994	Vietnam	Wong et al. 2016	Global H58 Phylogeny
10540_1_12	ERR352609	4.3.1.1	1996	Vietnam	Wong et al. 2016	Global H58 Phylogeny
10540_1_14	ERR352611	4.3.1.1	1994	Vietnam	Wong et al. 2016	Global H58 Phylogeny
10540_1_15	ERR352612	4.3.1.1	1996	Vietnam	Wong et al. 2016	Global H58 Phylogeny
10540_1_16	ERR352613	4.3.1.1	1996	Vietnam	Wong et al. 2016	Global H58 Phylogeny
10540_1_17	ERR352614	4.3.1.1	1994	Vietnam	Wong et al. 2016	Global H58 Phylogeny
10540_1_18	ERR352615	4.3.1.1	1995	Vietnam	Wong et al. 2016	Global H58 Phylogeny
10540_1_19	ERR352616	4.3.1.1	1996	Vietnam	Wong et al. 2016	Global H58 Phylogeny
10540_1_20	ERR352617	4.3.1.1	1994	Vietnam	Wong et al. 2016	Global H58 Phylogeny
10540_1_21	ERR352618	4.3.1.1	1995	Vietnam	Wong et al. 2016	Global H58 Phylogeny
10540_1_22	ERR352619	4.3.1.1	1996	Vietnam	Wong et al. 2016	Global H58 Phylogeny
10540_1_23	ERR352620	4.3.1.1	1996	Vietnam	Wong et al. 2016	Global H58 Phylogeny
10540_1_24	ERR352621	4.3.1.1	1995	Vietnam	Wong et al. 2016	Global H58 Phylogeny
10540_1_26	ERR352623	4.3.1.1	1996	Vietnam	Wong et al. 2016	Global H58 Phylogeny
10540_1_27	ERR352624	4.3.1.1	1996	Vietnam	Wong et al. 2016	Global H58 Phylogeny
10540_1_28	ERR352625	4.3.1.1	1995	Vietnam	Wong et al. 2016	Global H58 Phylogeny
10540_1_29	ERR352626	4.3.1.1	1995	Vietnam	Wong et al. 2016	Global H58 Phylogeny
10540_1_30	ERR352627	4.3.1.1	1996	Vietnam	Wong et al. 2016	Global H58 Phylogeny
10540_1_31	ERR352628	4.3.1.1	1995	Vietnam	Wong et al. 2016	Global H58 Phylogeny
10540_1_32	ERR352629	4.3.1.1	1996	Vietnam	Wong et al. 2016	Global H58 Phylogeny
10540_1_34	ERR352631	4.3.1.1	1996	Vietnam	Wong et al. 2016	Global H58 Phylogeny
10540_1_35	ERR352632	4.3.1.1	1995	Vietnam	Wong et al. 2016	Global H58 Phylogeny
10540_1_36	ERR352633	4.3.1.1	1995	Vietnam	Wong et al. 2016	Global H58 Phylogeny
10540_1_38	ERR352635	4.3.1.1	1994	Vietnam	Wong et al. 2016	Global H58 Phylogeny
10540_1_39	ERR352636	4.3.1.1	1995	Vietnam	Wong et al. 2016	Global H58 Phylogeny
10540_1_40	ERR352637	4.3.1.1	1996	Vietnam	Wong et al. 2016	Global H58 Phylogeny
10540_1_41	ERR352638	4.3.1.1	1996	Vietnam	Wong et al. 2016	Global H58 Phylogeny
10540_1_42	ERR352639	4.3.1.1	1996	Vietnam	Wong et al. 2016	Global H58 Phylogeny
10540_1_43	ERR352640	4.3.1.1	1996	Vietnam	Wong et al. 2016	Global H58 Phylogeny
10540_1_44	ERR352641	4.3.1.1	1994	Vietnam	Wong et al. 2016	Global H58 Phylogeny
10540_1_45	ERR352642	4.3.1.1	1994	Vietnam	Wong et al. 2016	Global H58 Phylogeny
10540_1_46	ERR352643	4.3.1.1	1997	Vietnam	Wong et al. 2016	Global H58 Phylogeny
10540_1_48	ERR352645	4.3.1.1	1994	Vietnam	Wong et al. 2016	Global H58 Phylogeny
10540_1_49	ERR352646	4.3.1.1	1997	Vietnam	Wong et al. 2016	Global H58 Phylogeny
10540_1_51	ERR352648	4.3.1.1	1994	Vietnam	Wong et al. 2016	Global H58 Phylogeny
10540_1_52	ERR352649	4.3.1.1	1997	Vietnam	Wong et al. 2016	Global H58 Phylogeny
10540_1_58	ERR352655	4.3.1.1	1995	Vietnam	Wong et al. 2016	Global H58 Phylogeny
10540_1_59	ERR352656	4.3.1.1	1997	Vietnam	Wong et al. 2016	Global H58 Phylogeny
10540_1_61	ERR352658	4.3.1.1	1994	Vietnam	Wong et al. 2016	Global H58 Phylogeny
10540_1_63	ERR352661	4.3.1.1	1997	Vietnam	Wong et al. 2016	Global H58 Phylogeny
10540_1_64	ERR352662	4.3.1.1	1997	Vietnam	Wong et al. 2016	Global H58 Phylogeny
10540_1_68	ERR352669	4.3.1.1	1994	Vietnam	Wong et al. 2016	Global H58 Phylogeny
10540_1_69	ERR352671	4.3.1.1	1999	Vietnam	Wong et al. 2016	Global H58 Phylogeny
10540_1_70	ERR352673	4.3.1.1	1997	Vietnam	Wong et al. 2016	Global H58 Phylogeny
10540_1_73	ERR352679	4.3.1.1	1997	Vietnam	Wong et al. 2016	Global H58 Phylogeny
10540_1_74	ERR352681	4.3.1.1	1997	Vietnam	Wong et al. 2016	Global H58 Phylogeny
10540_1_76	ERR352685	4.3.1.1	1997	Vietnam	Wong et al. 2016	Global H58 Phylogeny
10540_1_78	ERR352689	4.3.1.1	1994	Vietnam	Wong et al. 2016	Global H58 Phylogeny
10540_1_8	ERR352605	4.3.1.1	1995	Vietnam	Wong et al. 2016	Global H58 Phylogeny
10540_1_82	ERR352697	4.3.1.1	1995	Vietnam	Wong et al. 2016	Global H58 Phylogeny
10540_1_85	ERR352703	4.3.1.1	1994	Vietnam	Wong et al. 2016	Global H58 Phylogeny
10540_1_88	ERR352709	4.3.1.1	1994	Vietnam	Wong et al. 2016	Global H58 Phylogeny
10540_1_89	ERR352711	4.3.1.1	1994	Vietnam	Wong et al. 2016	Global H58 Phylogeny
10540_1_9	ERR352606	4.3.1.1	1995	Vietnam	Wong et al. 2016	Global H58 Phylogeny
10540_1_90	ERR352713	4.3.1.1	1994	Vietnam	Wong et al. 2016	Global H58 Phylogeny
10540_1_91	ERR352715	4.3.1.1	1994	Vietnam	Wong et al. 2016	Global H58 Phylogeny
10540_1_92	ERR352717	4.3.1.1	1994	Vietnam	Wong et al. 2016	Global H58 Phylogeny
10540_1_93	ERR352719	4.3.1.1	1994	Vietnam	Wong et al. 2016	Global H58 Phylogeny
10540_1_94	ERR352721	4.3.1.1	1994	Vietnam	Wong et al. 2016	Global H58 Phylogeny
10540_1_96	ERR352725	4.3.1.1	1994	Vietnam	Wong et al. 2016	Global H58 Phylogeny
10561_2_24	ERR357599	4.3.1.1	1994	Vietnam	Wong et al. 2016	Global H58 Phylogeny
10561_2_43	ERR357618	4.3.1.1	1995	Vietnam	Wong et al. 2016	Global H58 Phylogeny
10561_2_67	ERR357642	4.3.1.1	1994	Vietnam	Wong et al. 2016	Global H58 Phylogeny
10561_2_68	ERR357643	4.3.1.1	1994	Vietnam	Wong et al. 2016	Global H58 Phylogeny
10561_2_69	ERR357644	4.3.1.1	1995	Vietnam	Wong et al. 2016	Global H58 Phylogeny
10561_2_70	ERR357645	4.3.1.1	1994	Vietnam	Wong et al. 2016	Global H58 Phylogeny
10561_2_72	ERR357647	4.3.1.1	1995	Vietnam	Wong et al. 2016	Global H58 Phylogeny
10561_2_74	ERR357649	4.3.1.1	1994	Vietnam	Wong et al. 2016	Global H58 Phylogeny
10561_2_76	ERR357651	4.3.1.1	1993	Vietnam	Wong et al. 2016	Global H58 Phylogeny
10561_2_79	ERR357654	4.3.1.1	1997	Vietnam	Wong et al. 2016	Global H58 Phylogeny
10561_2_80	ERR357655	4.3.1.1	1994	Vietnam	Wong et al. 2016	Global H58 Phylogeny
10561_2_82	ERR357657	4.3.1.1	1994	Vietnam	Wong et al. 2016	Global H58 Phylogeny
10561_2_84	ERR357659	4.3.1.1	1993	Vietnam	Wong et al. 2016	Global H58 Phylogeny
10561_2_86	ERR357661	4.3.1.1	1994	Vietnam	Wong et al. 2016	Global H58 Phylogeny
10426_1_48	ERR349569	4.3.1.1	1997	Vietnam	Wong et al. 2016	Global H58 Phylogeny
10426_1_50	ERR349571	4.3.1.1	1997	Vietnam	Wong et al. 2016	Global H58 Phylogeny
10426_1_55	ERR349576	4.3.1.1	1997	Vietnam	Wong et al. 2016	Global H58 Phylogeny
10426_1_59	ERR349580	4.3.1.1	1997	Vietnam	Wong et al. 2016	Global H58 Phylogeny
10426_1_60	ERR349581	4.3.1.1	1995	Vietnam	Wong et al. 2016	Global H58 Phylogeny
10540_1_47	ERR352644	4.3.1.1	1997	Vietnam	Wong et al. 2016	Global H58 Phylogeny
10540_1_50	ERR352647	4.3.1.1	1997	Vietnam	Wong et al. 2016	Global H58 Phylogeny
10540_1_53	ERR352650	4.3.1.1	1998	Vietnam	Wong et al. 2016	Global H58 Phylogeny
10540_1_54	ERR352651	4.3.1.1	1997	Vietnam	Wong et al. 2016	Global H58 Phylogeny
10540_1_60	ERR352657	4.3.1.1	1998	Vietnam	Wong et al. 2016	Global H58 Phylogeny
10540_1_62	ERR352659	4.3.1.1	1998	Vietnam	Wong et al. 2016	Global H58 Phylogeny
10540_1_66	ERR352665	4.3.1.1	1999	Vietnam	Wong et al. 2016	Global H58 Phylogeny
10540_1_72	ERR352677	4.3.1.1	1998	Vietnam	Wong et al. 2016	Global H58 Phylogeny
10540_1_79	ERR352691	4.3.1.1	1995	Vietnam	Wong et al. 2016	Global H58 Phylogeny
10561_2_47	ERR357622	4.3.1.1	1998	Vietnam	Wong et al. 2016	Global H58 Phylogeny
10561_2_78	ERR357653	4.3.1.1	1997	Vietnam	Wong et al. 2016	Global H58 Phylogeny
10562_2_78	ERR357833	4.3.1.1	2011	Vietnam	Wong et al. 2016	Global H58 Phylogeny
10349_1_95	ERR343343	4.3.1.2	2004	Vietnam	Wong et al. 2016	Global H58 Phylogeny
10493_1_45	ERR352470	4.3.1.1	2010	Thailand	Wong et al. 2016	Global H58 Phylogeny
10562_2_16	ERR357771	4.3.1.1	2011	Thailand	Wong et al. 2016	Global H58 Phylogeny
10349_1_58	ERR343306	4.3.1	2010	Thailand	Wong et al. 2016	Global H58 Phylogeny
10349_1_22	ERR343270	4.3.1.1	2006	SEAsia	Wong et al. 2016	Global H58 Phylogeny
10562_2_14	ERR357769	4.3.1	2011	SEAsia	Wong et al. 2016	Global H58 Phylogeny
10209_5_3	ERR340759	4.3.1.1	2007	Cambodia	Wong et al. 2016	Global H58 Phylogeny
10209_5_2	ERR340758	4.3.1.1	2007	Cambodia	Wong et al. 2016	Global H58 Phylogeny
10607_2_53	ERR360845	4.3.1.1	2010	Cambodia	Wong et al. 2016	Global H58 Phylogeny
10060_5_2	ERR331205	4.3.1.1	2012	Cambodia	Wong et al. 2016	Global H58 Phylogeny
10060_5_3	ERR331206	4.3.1.1	2012	Cambodia	Wong et al. 2016	Global H58 Phylogeny
10060_5_4	ERR331207	4.3.1.1	2012	Cambodia	Wong et al. 2016	Global H58 Phylogeny
10060_5_5	ERR331208	4.3.1.1	2012	Cambodia	Wong et al. 2016	Global H58 Phylogeny
10209_5_1	ERR340757	4.3.1.1	2007	Cambodia	Wong et al. 2016	Global H58 Phylogeny
10209_5_10	ERR340766	4.3.1.1	2007	Cambodia	Wong et al. 2016	Global H58 Phylogeny
10209_5_11	ERR340767	4.3.1.1	2008	Cambodia	Wong et al. 2016	Global H58 Phylogeny
10209_5_12	ERR340768	4.3.1.1	2007	Cambodia	Wong et al. 2016	Global H58 Phylogeny
10209_5_14	ERR340770	4.3.1.1	2007	Cambodia	Wong et al. 2016	Global H58 Phylogeny
10209_5_15	ERR340771	4.3.1.1	2007	Cambodia	Wong et al. 2016	Global H58 Phylogeny
10209_5_16	ERR340772	4.3.1.1	2007	Cambodia	Wong et al. 2016	Global H58 Phylogeny
10209_5_17	ERR340773	4.3.1.1	2007	Cambodia	Wong et al. 2016	Global H58 Phylogeny
10209_5_19	ERR340775	4.3.1.1	2007	Cambodia	Wong et al. 2016	Global H58 Phylogeny
10209_5_4	ERR340760	4.3.1.1	2007	Cambodia	Wong et al. 2016	Global H58 Phylogeny
10209_5_5	ERR340761	4.3.1.1	2007	Cambodia	Wong et al. 2016	Global H58 Phylogeny
10209_5_7	ERR340763	4.3.1.1	2007	Cambodia	Wong et al. 2016	Global H58 Phylogeny
10492_1_79	ERR352332	4.3.1.1	2012	Cambodia	Wong et al. 2016	Global H58 Phylogeny
10607_1_42	ERR360738	4.3.1.1	2008	Cambodia	Wong et al. 2016	Global H58 Phylogeny
10607_1_43	ERR360739	4.3.1.1	2008	Cambodia	Wong et al. 2016	Global H58 Phylogeny
10607_1_44	ERR360740	4.3.1.1	2008	Cambodia	Wong et al. 2016	Global H58 Phylogeny
10607_1_45	ERR360741	4.3.1.1	2008	Cambodia	Wong et al. 2016	Global H58 Phylogeny
10607_1_46	ERR360742	4.3.1.1	2008	Cambodia	Wong et al. 2016	Global H58 Phylogeny
10607_1_47	ERR360743	4.3.1.1	2008	Cambodia	Wong et al. 2016	Global H58 Phylogeny
10607_1_48	ERR360744	4.3.1.1	2009	Cambodia	Wong et al. 2016	Global H58 Phylogeny
10607_1_49	ERR360745	4.3.1.1	2009	Cambodia	Wong et al. 2016	Global H58 Phylogeny
10607_1_50	ERR360746	4.3.1.1	2009	Cambodia	Wong et al. 2016	Global H58 Phylogeny
10607_1_52	ERR360748	4.3.1.1	2010	Cambodia	Wong et al. 2016	Global H58 Phylogeny
10607_1_58	ERR360754	4.3.1.1	2010	Cambodia	Wong et al. 2016	Global H58 Phylogeny
10607_1_59	ERR360755	4.3.1.1	2011	Cambodia	Wong et al. 2016	Global H58 Phylogeny
10607_1_60	ERR360756	4.3.1.1	2011	Cambodia	Wong et al. 2016	Global H58 Phylogeny
10607_1_62	ERR360758	4.3.1.1	2011	Cambodia	Wong et al. 2016	Global H58 Phylogeny
10607_1_63	ERR360759	4.3.1.1	2011	Cambodia	Wong et al. 2016	Global H58 Phylogeny
10607_1_64	ERR360760	4.3.1.1	2011	Cambodia	Wong et al. 2016	Global H58 Phylogeny
10607_1_65	ERR360761	4.3.1.1	2011	Cambodia	Wong et al. 2016	Global H58 Phylogeny
10607_1_66	ERR360762	4.3.1.1	2011	Cambodia	Wong et al. 2016	Global H58 Phylogeny
10607_1_67	ERR360763	4.3.1.1	2011	Cambodia	Wong et al. 2016	Global H58 Phylogeny
10607_1_69	ERR360765	4.3.1.1	2011	Cambodia	Wong et al. 2016	Global H58 Phylogeny
10607_1_70	ERR360766	4.3.1.1	2011	Cambodia	Wong et al. 2016	Global H58 Phylogeny
10607_1_73	ERR360769	4.3.1.1	2011	Cambodia	Wong et al. 2016	Global H58 Phylogeny
10607_1_74	ERR360770	4.3.1.1	2011	Cambodia	Wong et al. 2016	Global H58 Phylogeny
10607_1_75	ERR360771	4.3.1.1	2011	Cambodia	Wong et al. 2016	Global H58 Phylogeny
10607_1_76	ERR360772	4.3.1.1	2011	Cambodia	Wong et al. 2016	Global H58 Phylogeny
10607_1_77	ERR360773	4.3.1.1	2011	Cambodia	Wong et al. 2016	Global H58 Phylogeny
10607_1_78	ERR360774	4.3.1.1	2011	Cambodia	Wong et al. 2016	Global H58 Phylogeny
10607_1_79	ERR360775	4.3.1.1	2012	Cambodia	Wong et al. 2016	Global H58 Phylogeny
10607_1_80	ERR360776	4.3.1.1	2012	Cambodia	Wong et al. 2016	Global H58 Phylogeny
10607_1_81	ERR360777	4.3.1.1	2012	Cambodia	Wong et al. 2016	Global H58 Phylogeny
10607_1_82	ERR360778	4.3.1.1	2012	Cambodia	Wong et al. 2016	Global H58 Phylogeny
10607_1_83	ERR360779	4.3.1.1	2012	Cambodia	Wong et al. 2016	Global H58 Phylogeny
10607_1_84	ERR360780	4.3.1.1	2012	Cambodia	Wong et al. 2016	Global H58 Phylogeny
10607_1_85	ERR360781	4.3.1.1	2012	Cambodia	Wong et al. 2016	Global H58 Phylogeny
10607_1_86	ERR360782	4.3.1.1	2012	Cambodia	Wong et al. 2016	Global H58 Phylogeny
10607_1_87	ERR360783	4.3.1.1	2012	Cambodia	Wong et al. 2016	Global H58 Phylogeny
10607_1_89	ERR360785	4.3.1.1	2012	Cambodia	Wong et al. 2016	Global H58 Phylogeny
10607_1_90	ERR360786	4.3.1.1	2012	Cambodia	Wong et al. 2016	Global H58 Phylogeny
10607_1_91	ERR360787	4.3.1.1	2012	Cambodia	Wong et al. 2016	Global H58 Phylogeny
10607_1_92	ERR360788	4.3.1.1	2012	Cambodia	Wong et al. 2016	Global H58 Phylogeny
10607_1_93	ERR360789	4.3.1.1	2012	Cambodia	Wong et al. 2016	Global H58 Phylogeny
10607_1_95	ERR360791	4.3.1.1	2012	Cambodia	Wong et al. 2016	Global H58 Phylogeny
10607_1_96	ERR360792	4.3.1.1	2012	Cambodia	Wong et al. 2016	Global H58 Phylogeny
10607_2_54	ERR360846	4.3.1.1	2010	Cambodia	Wong et al. 2016	Global H58 Phylogeny
10607_2_55	ERR360847	4.3.1.1	2010	Cambodia	Wong et al. 2016	Global H58 Phylogeny
10607_2_56	ERR360848	4.3.1.1	2010	Cambodia	Wong et al. 2016	Global H58 Phylogeny
10608_1_1	ERR360889	4.3.1.1	2008	Cambodia	Wong et al. 2016	Global H58 Phylogeny
10608_1_2	ERR360890	4.3.1.1	2008	Cambodia	Wong et al. 2016	Global H58 Phylogeny
10608_1_3	ERR360891	4.3.1.1	2008	Cambodia	Wong et al. 2016	Global H58 Phylogeny
10608_2_11	ERR360954	4.3.1.1	2010	Cambodia	Wong et al. 2016	Global H58 Phylogeny
10608_2_12	ERR360955	4.3.1.1	2010	Cambodia	Wong et al. 2016	Global H58 Phylogeny
10608_2_13	ERR360956	4.3.1.1	2010	Cambodia	Wong et al. 2016	Global H58 Phylogeny
10608_2_15	ERR360958	4.3.1.1	2010	Cambodia	Wong et al. 2016	Global H58 Phylogeny
10608_2_16	ERR360959	4.3.1.1	2010	Cambodia	Wong et al. 2016	Global H58 Phylogeny
10608_2_17	ERR360960	4.3.1.1	2010	Cambodia	Wong et al. 2016	Global H58 Phylogeny
10608_2_18	ERR360961	4.3.1.1	2011	Cambodia	Wong et al. 2016	Global H58 Phylogeny
10608_2_19	ERR360962	4.3.1.1	2011	Cambodia	Wong et al. 2016	Global H58 Phylogeny
10608_2_21	ERR360963	4.3.1.1	2012	Cambodia	Wong et al. 2016	Global H58 Phylogeny
10608_2_22	ERR360964	4.3.1.1	2012	Cambodia	Wong et al. 2016	Global H58 Phylogeny
10608_2_23	ERR360965	4.3.1.1	2012	Cambodia	Wong et al. 2016	Global H58 Phylogeny
10608_2_24	ERR360966	4.3.1.1	2012	Cambodia	Wong et al. 2016	Global H58 Phylogeny
10608_2_25	ERR360967	4.3.1.1	2012	Cambodia	Wong et al. 2016	Global H58 Phylogeny
10608_2_26	ERR360968	4.3.1.1	2012	Cambodia	Wong et al. 2016	Global H58 Phylogeny
10608_2_28	ERR360970	4.3.1.1	2012	Cambodia	Wong et al. 2016	Global H58 Phylogeny
10608_2_30	ERR360971	4.3.1.1	2012	Cambodia	Wong et al. 2016	Global H58 Phylogeny
10608_2_31	ERR360972	4.3.1.1	2012	Cambodia	Wong et al. 2016	Global H58 Phylogeny
10608_2_32	ERR360973	4.3.1.1	2012	Cambodia	Wong et al. 2016	Global H58 Phylogeny
10608_2_34	ERR360975	4.3.1.1	2012	Cambodia	Wong et al. 2016	Global H58 Phylogeny
10608_2_35	ERR360976	4.3.1.1	2012	Cambodia	Wong et al. 2016	Global H58 Phylogeny
10608_2_36	ERR360977	4.3.1.1	2012	Cambodia	Wong et al. 2016	Global H58 Phylogeny
10608_2_37	ERR360978	4.3.1.1	2012	Cambodia	Wong et al. 2016	Global H58 Phylogeny
10608_2_39	ERR360979	4.3.1.1	2012	Cambodia	Wong et al. 2016	Global H58 Phylogeny
10608_2_4	ERR360948	4.3.1.1	2008	Cambodia	Wong et al. 2016	Global H58 Phylogeny
10608_2_42	ERR360980	4.3.1.1	2012	Cambodia	Wong et al. 2016	Global H58 Phylogeny
10608_2_43	ERR360981	4.3.1.1	2012	Cambodia	Wong et al. 2016	Global H58 Phylogeny
10608_2_44	ERR360982	4.3.1.1	2012	Cambodia	Wong et al. 2016	Global H58 Phylogeny
10608_2_45	ERR360983	4.3.1.1	2012	Cambodia	Wong et al. 2016	Global H58 Phylogeny
10608_2_48	ERR360984	4.3.1.1	2012	Cambodia	Wong et al. 2016	Global H58 Phylogeny
10608_2_49	ERR360985	4.3.1.1	2012	Cambodia	Wong et al. 2016	Global H58 Phylogeny
10608_2_5	ERR360949	4.3.1.1	2008	Cambodia	Wong et al. 2016	Global H58 Phylogeny
10608_2_50	ERR360986	4.3.1.1	2012	Cambodia	Wong et al. 2016	Global H58 Phylogeny
10608_2_51	ERR360987	4.3.1.1	2012	Cambodia	Wong et al. 2016	Global H58 Phylogeny
10608_2_52	ERR360988	4.3.1.1	2012	Cambodia	Wong et al. 2016	Global H58 Phylogeny
10608_2_57	ERR360990	4.3.1.1	2012	Cambodia	Wong et al. 2016	Global H58 Phylogeny
10608_2_58	ERR360991	4.3.1.1	2012	Cambodia	Wong et al. 2016	Global H58 Phylogeny
10608_2_59	ERR360992	4.3.1.1	2012	Cambodia	Wong et al. 2016	Global H58 Phylogeny
10608_2_60	ERR360993	4.3.1.1	2012	Cambodia	Wong et al. 2016	Global H58 Phylogeny
10608_2_61	ERR360994	4.3.1.1	2012	Cambodia	Wong et al. 2016	Global H58 Phylogeny
10608_2_63	ERR360996	4.3.1.1	2012	Cambodia	Wong et al. 2016	Global H58 Phylogeny
10608_2_65	ERR360997	4.3.1.1	2012	Cambodia	Wong et al. 2016	Global H58 Phylogeny
10608_2_66	ERR360998	4.3.1.1	2012	Cambodia	Wong et al. 2016	Global H58 Phylogeny
10608_2_67	ERR360999	4.3.1.1	2012	Cambodia	Wong et al. 2016	Global H58 Phylogeny
10608_2_68	ERR361000	4.3.1.1	2012	Cambodia	Wong et al. 2016	Global H58 Phylogeny
10608_2_7	ERR360950	4.3.1.1	2008	Cambodia	Wong et al. 2016	Global H58 Phylogeny
10608_2_9	ERR360952	4.3.1.1	2010	Cambodia	Wong et al. 2016	Global H58 Phylogeny
9870_8_1	ERR319402	4.3.1.1	2008	Cambodia	Wong et al. 2016	Global H58 Phylogeny
9870_8_10	ERR319411	4.3.1.1	2008	Cambodia	Wong et al. 2016	Global H58 Phylogeny
9870_8_11	ERR319412	4.3.1.1	2009	Cambodia	Wong et al. 2016	Global H58 Phylogeny
9870_8_12	ERR319413	4.3.1.1	2009	Cambodia	Wong et al. 2016	Global H58 Phylogeny
9870_8_13	ERR319414	4.3.1.1	2009	Cambodia	Wong et al. 2016	Global H58 Phylogeny
9870_8_14	ERR319415	4.3.1.1	2009	Cambodia	Wong et al. 2016	Global H58 Phylogeny
9870_8_15	ERR319416	4.3.1.1	2009	Cambodia	Wong et al. 2016	Global H58 Phylogeny
9870_8_16	ERR319417	4.3.1.1	2009	Cambodia	Wong et al. 2016	Global H58 Phylogeny
9870_8_18	ERR319419	4.3.1.1	2009	Cambodia	Wong et al. 2016	Global H58 Phylogeny
9870_8_19	ERR319420	4.3.1.1	2009	Cambodia	Wong et al. 2016	Global H58 Phylogeny
9870_8_2	ERR319403	4.3.1.1	2008	Cambodia	Wong et al. 2016	Global H58 Phylogeny
9870_8_20	ERR319421	4.3.1.1	2009	Cambodia	Wong et al. 2016	Global H58 Phylogeny
9870_8_21	ERR319422	4.3.1.1	2010	Cambodia	Wong et al. 2016	Global H58 Phylogeny
9870_8_22	ERR319423	4.3.1.1	2010	Cambodia	Wong et al. 2016	Global H58 Phylogeny
9870_8_23	ERR319424	4.3.1.1	2010	Cambodia	Wong et al. 2016	Global H58 Phylogeny
9870_8_24	ERR319425	4.3.1.1	2010	Cambodia	Wong et al. 2016	Global H58 Phylogeny
9870_8_25	ERR319426	4.3.1.1	2010	Cambodia	Wong et al. 2016	Global H58 Phylogeny
9870_8_26	ERR319427	4.3.1.1	2010	Cambodia	Wong et al. 2016	Global H58 Phylogeny
9870_8_27	ERR319428	4.3.1.1	2010	Cambodia	Wong et al. 2016	Global H58 Phylogeny
9870_8_28	ERR319429	4.3.1.1	2010	Cambodia	Wong et al. 2016	Global H58 Phylogeny
9870_8_3	ERR319404	4.3.1.1	2008	Cambodia	Wong et al. 2016	Global H58 Phylogeny
9870_8_30	ERR319431	4.3.1.1	2010	Cambodia	Wong et al. 2016	Global H58 Phylogeny
9870_8_31	ERR319432	4.3.1.1	2010	Cambodia	Wong et al. 2016	Global H58 Phylogeny
9870_8_32	ERR319433	4.3.1.1	2010	Cambodia	Wong et al. 2016	Global H58 Phylogeny
9870_8_33	ERR319434	4.3.1.1	2010	Cambodia	Wong et al. 2016	Global H58 Phylogeny
9870_8_34	ERR319435	4.3.1.1	2010	Cambodia	Wong et al. 2016	Global H58 Phylogeny
9870_8_35	ERR319436	4.3.1.1	2010	Cambodia	Wong et al. 2016	Global H58 Phylogeny
9870_8_36	ERR319437	4.3.1.1	2010	Cambodia	Wong et al. 2016	Global H58 Phylogeny
9870_8_37	ERR319438	4.3.1.1	2010	Cambodia	Wong et al. 2016	Global H58 Phylogeny
9870_8_38	ERR319439	4.3.1.1	2010	Cambodia	Wong et al. 2016	Global H58 Phylogeny
9870_8_4	ERR319405	4.3.1.1	2008	Cambodia	Wong et al. 2016	Global H58 Phylogeny
9870_8_40	ERR319441	4.3.1.1	2010	Cambodia	Wong et al. 2016	Global H58 Phylogeny
9870_8_41	ERR319442	4.3.1.1	2011	Cambodia	Wong et al. 2016	Global H58 Phylogeny
9870_8_42	ERR319443	4.3.1.1	2011	Cambodia	Wong et al. 2016	Global H58 Phylogeny
9870_8_43	ERR319444	4.3.1.1	2011	Cambodia	Wong et al. 2016	Global H58 Phylogeny
9870_8_44	ERR319445	4.3.1.1	2011	Cambodia	Wong et al. 2016	Global H58 Phylogeny
9870_8_45	ERR319446	4.3.1.1	2011	Cambodia	Wong et al. 2016	Global H58 Phylogeny
9870_8_46	ERR319447	4.3.1.1	2011	Cambodia	Wong et al. 2016	Global H58 Phylogeny
9870_8_47	ERR319448	4.3.1.1	2011	Cambodia	Wong et al. 2016	Global H58 Phylogeny
9870_8_48	ERR319449	4.3.1.1	2011	Cambodia	Wong et al. 2016	Global H58 Phylogeny
9870_8_49	ERR319450	4.3.1.1	2011	Cambodia	Wong et al. 2016	Global H58 Phylogeny
9870_8_5	ERR319406	4.3.1.1	2008	Cambodia	Wong et al. 2016	Global H58 Phylogeny
9870_8_50	ERR319451	4.3.1.1	2011	Cambodia	Wong et al. 2016	Global H58 Phylogeny
9870_8_51	ERR319452	4.3.1.1	2011	Cambodia	Wong et al. 2016	Global H58 Phylogeny
9870_8_52	ERR319453	4.3.1.1	2011	Cambodia	Wong et al. 2016	Global H58 Phylogeny
9870_8_53	ERR319454	4.3.1.1	2011	Cambodia	Wong et al. 2016	Global H58 Phylogeny
9870_8_54	ERR319455	4.3.1.1	2011	Cambodia	Wong et al. 2016	Global H58 Phylogeny
9870_8_55	ERR319456	4.3.1.1	2011	Cambodia	Wong et al. 2016	Global H58 Phylogeny
9870_8_56	ERR319457	4.3.1.1	2011	Cambodia	Wong et al. 2016	Global H58 Phylogeny
9870_8_57	ERR319458	4.3.1.1	2011	Cambodia	Wong et al. 2016	Global H58 Phylogeny
9870_8_58	ERR319459	4.3.1.1	2011	Cambodia	Wong et al. 2016	Global H58 Phylogeny
9870_8_59	ERR319460	4.3.1.1	2011	Cambodia	Wong et al. 2016	Global H58 Phylogeny
9870_8_60	ERR319461	4.3.1.1	2011	Cambodia	Wong et al. 2016	Global H58 Phylogeny
9870_8_62	ERR319463	4.3.1.1	2011	Cambodia	Wong et al. 2016	Global H58 Phylogeny
9870_8_63	ERR319464	4.3.1.1	2011	Cambodia	Wong et al. 2016	Global H58 Phylogeny
9870_8_64	ERR319465	4.3.1.1	2011	Cambodia	Wong et al. 2016	Global H58 Phylogeny
9870_8_65	ERR319466	4.3.1.1	2011	Cambodia	Wong et al. 2016	Global H58 Phylogeny
9870_8_66	ERR319467	4.3.1.1	2011	Cambodia	Wong et al. 2016	Global H58 Phylogeny
9870_8_67	ERR319468	4.3.1.1	2011	Cambodia	Wong et al. 2016	Global H58 Phylogeny
9870_8_68	ERR319469	4.3.1.1	2011	Cambodia	Wong et al. 2016	Global H58 Phylogeny
9870_8_69	ERR319470	4.3.1.1	2011	Cambodia	Wong et al. 2016	Global H58 Phylogeny
9870_8_7	ERR319408	4.3.1.1	2008	Cambodia	Wong et al. 2016	Global H58 Phylogeny
9870_8_70	ERR319471	4.3.1.1	2011	Cambodia	Wong et al. 2016	Global H58 Phylogeny
9870_8_71	ERR319472	4.3.1.1	2012	Cambodia	Wong et al. 2016	Global H58 Phylogeny
9870_8_72	ERR319473	4.3.1.1	2012	Cambodia	Wong et al. 2016	Global H58 Phylogeny
9870_8_73	ERR319474	4.3.1.1	2012	Cambodia	Wong et al. 2016	Global H58 Phylogeny
9870_8_74	ERR319475	4.3.1.1	2012	Cambodia	Wong et al. 2016	Global H58 Phylogeny
9870_8_75	ERR319476	4.3.1.1	2012	Cambodia	Wong et al. 2016	Global H58 Phylogeny
9870_8_76	ERR319477	4.3.1.1	2012	Cambodia	Wong et al. 2016	Global H58 Phylogeny
9870_8_77	ERR319478	4.3.1.1	2012	Cambodia	Wong et al. 2016	Global H58 Phylogeny
9870_8_78	ERR319479	4.3.1.1	2012	Cambodia	Wong et al. 2016	Global H58 Phylogeny
9870_8_79	ERR319480	4.3.1.1	2012	Cambodia	Wong et al. 2016	Global H58 Phylogeny
9870_8_8	ERR319409	4.3.1.1	2008	Cambodia	Wong et al. 2016	Global H58 Phylogeny
9870_8_80	ERR319481	4.3.1.1	2012	Cambodia	Wong et al. 2016	Global H58 Phylogeny
9870_8_81	ERR319482	4.3.1.1	2012	Cambodia	Wong et al. 2016	Global H58 Phylogeny
9870_8_82	ERR319483	4.3.1.1	2012	Cambodia	Wong et al. 2016	Global H58 Phylogeny
9870_8_83	ERR319484	4.3.1.1	2012	Cambodia	Wong et al. 2016	Global H58 Phylogeny
9870_8_84	ERR319485	4.3.1.1	2012	Cambodia	Wong et al. 2016	Global H58 Phylogeny
9870_8_85	ERR319486	4.3.1.1	2012	Cambodia	Wong et al. 2016	Global H58 Phylogeny
9870_8_86	ERR319487	4.3.1.1	2012	Cambodia	Wong et al. 2016	Global H58 Phylogeny
9870_8_87	ERR319488	4.3.1.1	2012	Cambodia	Wong et al. 2016	Global H58 Phylogeny
9870_8_88	ERR319489	4.3.1.1	2012	Cambodia	Wong et al. 2016	Global H58 Phylogeny
9870_8_89	ERR319490	4.3.1.1	2012	Cambodia	Wong et al. 2016	Global H58 Phylogeny
9870_8_9	ERR319410	4.3.1.1	2008	Cambodia	Wong et al. 2016	Global H58 Phylogeny
9870_8_91	ERR319492	4.3.1.1	2012	Cambodia	Wong et al. 2016	Global H58 Phylogeny
9870_8_93	ERR319494	4.3.1.1	2012	Cambodia	Wong et al. 2016	Global H58 Phylogeny
9870_8_94	ERR319495	4.3.1.1	2012	Cambodia	Wong et al. 2016	Global H58 Phylogeny
10209_5_18	ERR340774	4.3.1.1	2007	Cambodia	Wong et al. 2016	Global H58 Phylogeny
9870_8_39	ERR319440	4.3.1.1	2010	Cambodia	Wong et al. 2016	Global H58 Phylogeny
10493_1_26	ERR352451	4.3.1	2011	SriLanka	Wong et al. 2016	Global H58 Phylogeny
10593_2_10	ERR360623	4.3.1.2	2002	SriLanka	Wong et al. 2016	Global H58 Phylogeny
19787_3_1	ERR1556054	4.3.1.2.EA3	2015	Uganda	Park et al. 2018	Global H58 Phylogeny
19787_3_10	ERR1556063	4.3.1.2.EA3	2015	Uganda	Park et al. 2018	Global H58 Phylogeny
19787_3_11	ERR1556064	4.3.1.2.EA3	2015	Uganda	Park et al. 2018	Global H58 Phylogeny
19787_3_12	ERR1556065	4.3.1.2.EA3	2015	Uganda	Park et al. 2018	Global H58 Phylogeny
19787_3_13	ERR1556066	4.3.1.2.EA3	2015	Uganda	Park et al. 2018	Global H58 Phylogeny
19787_3_14	ERR1556067	4.3.1.2.EA3	2015	Uganda	Park et al. 2018	Global H58 Phylogeny
19787_3_15	ERR1556068	4.3.1.2.EA3	2015	Uganda	Park et al. 2018	Global H58 Phylogeny
19787_3_16	ERR1556069	4.3.1.2.EA3	2015	Uganda	Park et al. 2018	Global H58 Phylogeny
19787_3_17	ERR1556070	4.3.1.2.EA3	2015	Uganda	Park et al. 2018	Global H58 Phylogeny
19787_3_18	ERR1556071	4.3.1.2.EA3	2015	Uganda	Park et al. 2018	Global H58 Phylogeny
19787_3_19	ERR1556072	4.3.1.2.EA3	2015	Uganda	Park et al. 2018	Global H58 Phylogeny
19787_3_2	ERR1556055	4.3.1.2.EA3	2015	Uganda	Park et al. 2018	Global H58 Phylogeny
19787_3_20	ERR1556073	4.3.1.2.EA3	2015	Uganda	Park et al. 2018	Global H58 Phylogeny
19787_3_21	ERR1556074	4.3.1.2.EA3	2015	Uganda	Park et al. 2018	Global H58 Phylogeny
19787_3_22	ERR1556075	4.3.1.2.EA3	2015	Uganda	Park et al. 2018	Global H58 Phylogeny
19787_3_23	ERR1556076	4.3.1.2.EA3	2015	Uganda	Park et al. 2018	Global H58 Phylogeny
19787_3_24	ERR1556077	4.3.1.2.EA3	2015	Uganda	Park et al. 2018	Global H58 Phylogeny
19787_3_25	ERR1556078	4.3.1.2.EA3	2015	Uganda	Park et al. 2018	Global H58 Phylogeny
19787_3_26	ERR1556079	4.3.1.2.EA3	2015	Uganda	Park et al. 2018	Global H58 Phylogeny
19787_3_27	ERR1556080	4.3.1.2.EA3	2015	Uganda	Park et al. 2018	Global H58 Phylogeny
19787_3_28	ERR1556081	4.3.1.2.EA3	2015	Uganda	Park et al. 2018	Global H58 Phylogeny
19787_3_29	ERR1556082	4.3.1.2.EA3	2015	Uganda	Park et al. 2018	Global H58 Phylogeny
19787_3_3	ERR1556056	4.3.1.2.EA3	2015	Uganda	Park et al. 2018	Global H58 Phylogeny
19787_3_30	ERR1556083	4.3.1.2.EA3	2015	Uganda	Park et al. 2018	Global H58 Phylogeny
19787_3_4	ERR1556057	4.3.1.2.EA3	2015	Uganda	Park et al. 2018	Global H58 Phylogeny
19787_3_5	ERR1556058	4.3.1.2.EA3	2015	Uganda	Park et al. 2018	Global H58 Phylogeny
19787_3_6	ERR1556059	4.3.1.2.EA3	2015	Uganda	Park et al. 2018	Global H58 Phylogeny
19787_3_7	ERR1556060	4.3.1.2.EA3	2015	Uganda	Park et al. 2018	Global H58 Phylogeny
19787_3_8	ERR1556061	4.3.1.2.EA3	2015	Uganda	Park et al. 2018	Global H58 Phylogeny
19787_3_9	ERR1556062	4.3.1.2.EA3	2015	Uganda	Park et al. 2018	Global H58 Phylogeny
10071_8_65	ERR338134	4.3.1.2.EA2	2007	Kenya	Wong et al. 2016	Global H58 Phylogeny
10071_8_66	ERR338135	4.3.1.2.EA2	2007	Kenya	Wong et al. 2016	Global H58 Phylogeny
10071_8_69	ERR338138	4.3.1.2.EA2	2007	Kenya	Wong et al. 2016	Global H58 Phylogeny
10071_8_77	ERR338146	4.3.1.2.EA2	2007	Kenya	Wong et al. 2016	Global H58 Phylogeny
10071_8_80	ERR338149	4.3.1.2.EA2	2007	Kenya	Wong et al. 2016	Global H58 Phylogeny
10071_8_81	ERR338150	4.3.1.2.EA2	2007	Kenya	Wong et al. 2016	Global H58 Phylogeny
10071_8_89	ERR338158	4.3.1.2.EA2	2007	Kenya	Wong et al. 2016	Global H58 Phylogeny
10071_8_92	ERR338161	4.3.1.2.EA2	2008	Kenya	Wong et al. 2016	Global H58 Phylogeny
8525_3_31	ERR212637	4.3.1.2.EA2	2008	Kenya	Wong et al. 2016	Global H58 Phylogeny
8525_3_71	ERR212677	4.3.1.2.EA2	2001	Kenya	Wong et al. 2016	Global H58 Phylogeny
16404_4_73	ERR984774	4.3.1.1.EA1	2012	Kenya	Park et al. 2018	Global H58 Phylogeny
16404_4_39	ERR984741	4.3.1.2.EA2	2013	Kenya	Park et al. 2018	Global H58 Phylogeny
16404_5_69	ERR984860	4.3.1.2.EA2	2013	Kenya	Park et al. 2018	Global H58 Phylogeny
16549_7_5	ERR1010004	4.3.1.2.EA2	2013	Kenya	Park et al. 2018	Global H58 Phylogeny
16549_8_34	ERR1010122	4.3.1.2.EA2	2013	Kenya	Park et al. 2018	Global H58 Phylogeny
10071_8_62	ERR338131	4.3.1.1.EA1	2007	Kenya	Wong et al. 2016	Global H58 Phylogeny
10071_8_63	ERR338132	4.3.1.1.EA1	2008	Kenya	Wong et al. 2016	Global H58 Phylogeny
10071_8_64	ERR338133	4.3.1.1.EA1	2007	Kenya	Wong et al. 2016	Global H58 Phylogeny
10071_8_67	ERR338136	4.3.1.1.EA1	2008	Kenya	Wong et al. 2016	Global H58 Phylogeny
10071_8_68	ERR338137	4.3.1.1.EA1	2007	Kenya	Wong et al. 2016	Global H58 Phylogeny
10071_8_70	ERR338139	4.3.1.1.EA1	2008	Kenya	Wong et al. 2016	Global H58 Phylogeny
10071_8_71	ERR338140	4.3.1.1.EA1	2009	Kenya	Wong et al. 2016	Global H58 Phylogeny
10071_8_72	ERR338141	4.3.1.1.EA1	2007	Kenya	Wong et al. 2016	Global H58 Phylogeny
10071_8_74	ERR338143	4.3.1.1.EA1	2008	Kenya	Wong et al. 2016	Global H58 Phylogeny
10071_8_76	ERR338145	4.3.1.1.EA1	2007	Kenya	Wong et al. 2016	Global H58 Phylogeny
10071_8_78	ERR338147	4.3.1.1.EA1	2008	Kenya	Wong et al. 2016	Global H58 Phylogeny
10071_8_79	ERR338148	4.3.1.1.EA1	2007	Kenya	Wong et al. 2016	Global H58 Phylogeny
10071_8_82	ERR338151	4.3.1.1.EA1	2008	Kenya	Wong et al. 2016	Global H58 Phylogeny
10071_8_83	ERR338152	4.3.1.1.EA1	2007	Kenya	Wong et al. 2016	Global H58 Phylogeny
10071_8_88	ERR338157	4.3.1.1.EA1	2007	Kenya	Wong et al. 2016	Global H58 Phylogeny
10071_8_90	ERR338159	4.3.1.1.EA1	2009	Kenya	Wong et al. 2016	Global H58 Phylogeny
10071_8_91	ERR338160	4.3.1.1.EA1	2008	Kenya	Wong et al. 2016	Global H58 Phylogeny
10071_8_94	ERR338163	4.3.1.1.EA1	2008	Kenya	Wong et al. 2016	Global H58 Phylogeny
10071_8_95	ERR338164	4.3.1.1.EA1	2007	Kenya	Wong et al. 2016	Global H58 Phylogeny
8525_2_54	ERR212564	4.3.1.1.EA1	2008	Kenya	Wong et al. 2016	Global H58 Phylogeny
8525_3_30	ERR212636	4.3.1.1.EA1	2008	Kenya	Wong et al. 2016	Global H58 Phylogeny
8525_3_32	ERR212638	4.3.1.1.EA1	2008	Kenya	Wong et al. 2016	Global H58 Phylogeny
8525_3_33	ERR212639	4.3.1.1.EA1	2008	Kenya	Wong et al. 2016	Global H58 Phylogeny
8525_3_34	ERR212640	4.3.1.1.EA1	2008	Kenya	Wong et al. 2016	Global H58 Phylogeny
8525_3_37	ERR212643	4.3.1.1.EA1	2008	Kenya	Wong et al. 2016	Global H58 Phylogeny
8525_3_40	ERR212646	4.3.1.1.EA1	2008	Kenya	Wong et al. 2016	Global H58 Phylogeny
8525_3_42	ERR212648	4.3.1.1.EA1	2008	Kenya	Wong et al. 2016	Global H58 Phylogeny
8525_3_45	ERR212651	4.3.1.1.EA1	2008	Kenya	Wong et al. 2016	Global H58 Phylogeny
8525_3_46	ERR212652	4.3.1.1.EA1	2008	Kenya	Wong et al. 2016	Global H58 Phylogeny
8525_3_47	ERR212653	4.3.1.1.EA1	2008	Kenya	Wong et al. 2016	Global H58 Phylogeny
8525_3_48	ERR212654	4.3.1.1.EA1	2008	Kenya	Wong et al. 2016	Global H58 Phylogeny
8525_3_49	ERR212655	4.3.1.1.EA1	2008	Kenya	Wong et al. 2016	Global H58 Phylogeny
8525_3_51	ERR212657	4.3.1.1.EA1	2008	Kenya	Wong et al. 2016	Global H58 Phylogeny
8525_3_53	ERR212659	4.3.1.1.EA1	2008	Kenya	Wong et al. 2016	Global H58 Phylogeny
8525_3_54	ERR212660	4.3.1.1.EA1	2008	Kenya	Wong et al. 2016	Global H58 Phylogeny
8525_3_55	ERR212661	4.3.1.1.EA1	2008	Kenya	Wong et al. 2016	Global H58 Phylogeny
8525_3_56	ERR212662	4.3.1.1.EA1	2008	Kenya	Wong et al. 2016	Global H58 Phylogeny
8525_3_58	ERR212664	4.3.1.1.EA1	2008	Kenya	Wong et al. 2016	Global H58 Phylogeny
8525_3_59	ERR212665	4.3.1.1.EA1	2008	Kenya	Wong et al. 2016	Global H58 Phylogeny
8525_3_60	ERR212666	4.3.1.1.EA1	2008	Kenya	Wong et al. 2016	Global H58 Phylogeny
8525_3_61	ERR212667	4.3.1.1.EA1	2008	Kenya	Wong et al. 2016	Global H58 Phylogeny
8615_4_29	ERR217406	4.3.1.1.EA1	2004	Kenya	Wong et al. 2016	Global H58 Phylogeny
16404_4_46	ERR984748	4.3.1.1.EA1	2012	Kenya	Park et al. 2018	Global H58 Phylogeny
16404_4_59	ERR984761	4.3.1.1.EA1	2012	Kenya	Park et al. 2018	Global H58 Phylogeny
16404_4_65	ERR984767	4.3.1.1.EA1	2013	Kenya	Park et al. 2018	Global H58 Phylogeny
16404_4_66	ERR984768	4.3.1.1.EA1	2012	Kenya	Park et al. 2018	Global H58 Phylogeny
16404_4_80	ERR984781	4.3.1.1.EA1	2012	Kenya	Park et al. 2018	Global H58 Phylogeny
16404_4_87	ERR984788	4.3.1.1.EA1	2012	Kenya	Park et al. 2018	Global H58 Phylogeny
16404_4_89	ERR984790	4.3.1.1.EA1	2013	Kenya	Park et al. 2018	Global H58 Phylogeny
16404_5_35	ERR984826	4.3.1.1.EA1	2012	Kenya	Park et al. 2018	Global H58 Phylogeny
16404_5_37	ERR984828	4.3.1.1.EA1	2012	Kenya	Park et al. 2018	Global H58 Phylogeny
16404_5_44	ERR984835	4.3.1.1.EA1	2012	Kenya	Park et al. 2018	Global H58 Phylogeny
16404_5_45	ERR984836	4.3.1.1.EA1	2013	Kenya	Park et al. 2018	Global H58 Phylogeny
16404_5_51	ERR984842	4.3.1.1.EA1	2012	Kenya	Park et al. 2018	Global H58 Phylogeny
16404_5_52	ERR984843	4.3.1.1.EA1	2012	Kenya	Park et al. 2018	Global H58 Phylogeny
16404_5_53	ERR984844	4.3.1.1.EA1	2012	Kenya	Park et al. 2018	Global H58 Phylogeny
16404_5_59	ERR984850	4.3.1.1.EA1	2012	Kenya	Park et al. 2018	Global H58 Phylogeny
16404_5_60	ERR984851	4.3.1.1.EA1	2012	Kenya	Park et al. 2018	Global H58 Phylogeny
16404_5_61	ERR984852	4.3.1.1.EA1	2012	Kenya	Park et al. 2018	Global H58 Phylogeny
16404_5_68	ERR984859	4.3.1.1.EA1	2012	Kenya	Park et al. 2018	Global H58 Phylogeny
16404_5_75	ERR984866	4.3.1.1.EA1	2012	Kenya	Park et al. 2018	Global H58 Phylogeny
16404_5_76	ERR984867	4.3.1.1.EA1	2012	Kenya	Park et al. 2018	Global H58 Phylogeny
16404_5_77	ERR984868	4.3.1.1.EA1	2012	Kenya	Park et al. 2018	Global H58 Phylogeny
16404_5_84	ERR984875	4.3.1.1.EA1	2012	Kenya	Park et al. 2018	Global H58 Phylogeny
16404_5_85	ERR984876	4.3.1.1.EA1	2012	Kenya	Park et al. 2018	Global H58 Phylogeny
16404_6_3	ERR984885	4.3.1.1.EA1	2012	Kenya	Park et al. 2018	Global H58 Phylogeny
16404_6_35	ERR984917	4.3.1.1.EA1	2012	Kenya	Park et al. 2018	Global H58 Phylogeny
16549_7_18	ERR1010016	4.3.1.1.EA1	2012	Kenya	Park et al. 2018	Global H58 Phylogeny
16549_7_20	ERR1010018	4.3.1.1.EA1	2012	Kenya	Park et al. 2018	Global H58 Phylogeny
16549_7_23	ERR1010021	4.3.1.1.EA1	2012	Kenya	Park et al. 2018	Global H58 Phylogeny
16549_8_1	ERR1010089	4.3.1.1.EA1	2012	Kenya	Park et al. 2018	Global H58 Phylogeny
16549_8_10	ERR1010098	4.3.1.1.EA1	2012	Kenya	Park et al. 2018	Global H58 Phylogeny
16549_8_16	ERR1010104	4.3.1.1.EA1	2012	Kenya	Park et al. 2018	Global H58 Phylogeny
16549_8_17	ERR1010105	4.3.1.1.EA1	2012	Kenya	Park et al. 2018	Global H58 Phylogeny
16549_8_18	ERR1010106	4.3.1.1.EA1	2012	Kenya	Park et al. 2018	Global H58 Phylogeny
16549_8_2	ERR1010090	4.3.1.1.EA1	2012	Kenya	Park et al. 2018	Global H58 Phylogeny
16549_8_25	ERR1010113	4.3.1.1.EA1	2012	Kenya	Park et al. 2018	Global H58 Phylogeny
16549_8_31	ERR1010119	4.3.1.1.EA1	2013	Kenya	Park et al. 2018	Global H58 Phylogeny
16549_8_33	ERR1010121	4.3.1.1.EA1	2012	Kenya	Park et al. 2018	Global H58 Phylogeny
16549_8_47	ERR1010133	4.3.1.1.EA1	2012	Kenya	Park et al. 2018	Global H58 Phylogeny
16549_8_48	ERR1010134	4.3.1.1.EA1	2012	Kenya	Park et al. 2018	Global H58 Phylogeny
16549_8_54	ERR1010140	4.3.1.1.EA1	2012	Kenya	Park et al. 2018	Global H58 Phylogeny
16549_8_63	ERR1010148	4.3.1.1.EA1	2012	Kenya	Park et al. 2018	Global H58 Phylogeny
16549_8_7	ERR1010095	4.3.1.1.EA1	2013	Kenya	Park et al. 2018	Global H58 Phylogeny
16549_8_71	ERR1010156	4.3.1.1.EA1	2012	Kenya	Park et al. 2018	Global H58 Phylogeny
16549_8_8	ERR1010096	4.3.1.1.EA1	2012	Kenya	Park et al. 2018	Global H58 Phylogeny
16549_8_9	ERR1010097	4.3.1.1.EA1	2012	Kenya	Park et al. 2018	Global H58 Phylogeny
16404_4_5	ERR984707	4.3.1.1.EA1	2012	Kenya	Park et al. 2018	Global H58 Phylogeny
16404_4_53	ERR984755	4.3.1.1.EA1	2012	Kenya	Park et al. 2018	Global H58 Phylogeny
16404_4_75	ERR984776	4.3.1.1.EA1	2012	Kenya	Park et al. 2018	Global H58 Phylogeny
16404_4_82	ERR984783	4.3.1.1.EA1	2012	Kenya	Park et al. 2018	Global H58 Phylogeny
16404_5_36	ERR984827	4.3.1.1.EA1	2012	Kenya	Park et al. 2018	Global H58 Phylogeny
16404_5_43	ERR984834	4.3.1.1.EA1	2012	Kenya	Park et al. 2018	Global H58 Phylogeny
16404_5_67	ERR984858	4.3.1.1.EA1	2012	Kenya	Park et al. 2018	Global H58 Phylogeny
16549_7_4	ERR1010003	4.3.1.1.EA1	2012	Kenya	Park et al. 2018	Global H58 Phylogeny
16549_8_26	ERR1010114	4.3.1.1.EA1	2012	Kenya	Park et al. 2018	Global H58 Phylogeny
10562_2_77	ERR357832	4.3.1.2	2011	Indonesia	Wong et al. 2016	Global H58 Phylogeny
10493_1_82	ERR352507	4.3.1.2	2011	Indonesia	Wong et al. 2016	Global H58 Phylogeny
16399_4_37	ERR998595	4.3.1.2.EA2	2012	Tanzania	Park et al. 2018	Global H58 Phylogeny
10060_6_71	ERR331368	4.3.1.1.EA1	2008	Tanzania	Wong et al. 2016	Global H58 Phylogeny
10060_6_72	ERR331369	4.3.1.1.EA1	2008	Tanzania	Wong et al. 2016	Global H58 Phylogeny
10060_6_75	ERR331372	4.3.1.1.EA1	2008	Tanzania	Wong et al. 2016	Global H58 Phylogeny
10060_6_77	ERR331374	4.3.1.1.EA1	2008	Tanzania	Wong et al. 2016	Global H58 Phylogeny
10060_6_78	ERR331375	4.3.1.1.EA1	2008	Tanzania	Wong et al. 2016	Global H58 Phylogeny
10060_6_79	ERR331376	4.3.1.1.EA1	2008	Tanzania	Wong et al. 2016	Global H58 Phylogeny
10060_6_80	ERR331377	4.3.1.1.EA1	2008	Tanzania	Wong et al. 2016	Global H58 Phylogeny
10060_6_81	ERR331378	4.3.1.1.EA1	2008	Tanzania	Wong et al. 2016	Global H58 Phylogeny
10060_6_82	ERR331379	4.3.1.1.EA1	2008	Tanzania	Wong et al. 2016	Global H58 Phylogeny
10060_6_83	ERR331380	4.3.1.1.EA1	2008	Tanzania	Wong et al. 2016	Global H58 Phylogeny
7468_7_49	ERR108648	4.3.1.1.EA1	2009	Tanzania	Wong et al. 2016	Global H58 Phylogeny
7468_7_57	ERR108656	4.3.1.1.EA1	2009	Tanzania	Wong et al. 2016	Global H58 Phylogeny
7468_7_59	ERR108658	4.3.1.1.EA1	2009	Tanzania	Wong et al. 2016	Global H58 Phylogeny
7468_7_60	ERR108659	4.3.1.1.EA1	2009	Tanzania	Wong et al. 2016	Global H58 Phylogeny
7468_7_61	ERR108660	4.3.1.1.EA1	2009	Tanzania	Wong et al. 2016	Global H58 Phylogeny
7468_7_65	ERR108664	4.3.1.1.EA1	2010	Tanzania	Wong et al. 2016	Global H58 Phylogeny
7468_7_77	ERR108676	4.3.1.1.EA1	2009	Tanzania	Wong et al. 2016	Global H58 Phylogeny
7468_7_80	ERR108679	4.3.1.1.EA1	2009	Tanzania	Wong et al. 2016	Global H58 Phylogeny
7468_7_94	ERR108693	4.3.1.1.EA1	2009	Tanzania	Wong et al. 2016	Global H58 Phylogeny
7468_7_95	ERR108694	4.3.1.1.EA1	2010	Tanzania	Wong et al. 2016	Global H58 Phylogeny
16399_3_52	ERR998520	4.3.1.1.EA1	2012	Tanzania	Park et al. 2018	Global H58 Phylogeny
16399_3_68	ERR998536	4.3.1.1.EA1	2011	Tanzania	Park et al. 2018	Global H58 Phylogeny
16399_4_23	ERR998581	4.3.1.1.EA1	2012	Tanzania	Park et al. 2018	Global H58 Phylogeny
16399_4_42	ERR998600	4.3.1.1.EA1	2012	Tanzania	Park et al. 2018	Global H58 Phylogeny
16399_4_46	ERR998604	4.3.1.1.EA1	2012	Tanzania	Park et al. 2018	Global H58 Phylogeny
16399_4_52	ERR998610	4.3.1.1.EA1	2012	Tanzania	Park et al. 2018	Global H58 Phylogeny
16399_4_56	ERR998614	4.3.1.1.EA1	2011	Tanzania	Park et al. 2018	Global H58 Phylogeny
16399_4_61	ERR998619	4.3.1.1.EA1	2011	Tanzania	Park et al. 2018	Global H58 Phylogeny
16399_4_75	ERR998633	4.3.1.1.EA1	2012	Tanzania	Park et al. 2018	Global H58 Phylogeny
7468_7_55	ERR108654	4.3.1.2	2009	Tanzania	Wong et al. 2016	Global H58 Phylogeny
7468_7_64	ERR108663	4.3.1.2	2010	Tanzania	Wong et al. 2016	Global H58 Phylogeny
7468_7_66	ERR108665	4.3.1.2	2010	Tanzania	Wong et al. 2016	Global H58 Phylogeny
7468_7_67	ERR108666	4.3.1.2	2010	Tanzania	Wong et al. 2016	Global H58 Phylogeny
7468_7_68	ERR108667	4.3.1.2	2010	Tanzania	Wong et al. 2016	Global H58 Phylogeny
7468_7_69	ERR108668	4.3.1.2	2010	Tanzania	Wong et al. 2016	Global H58 Phylogeny
7468_7_70	ERR108669	4.3.1.2	2010	Tanzania	Wong et al. 2016	Global H58 Phylogeny
7468_7_71	ERR108670	4.3.1.2	2010	Tanzania	Wong et al. 2016	Global H58 Phylogeny
7468_7_86	ERR108685	4.3.1.2	2010	Tanzania	Wong et al. 2016	Global H58 Phylogeny
7468_7_87	ERR108686	4.3.1.2	2010	Tanzania	Wong et al. 2016	Global H58 Phylogeny
7468_7_88	ERR108687	4.3.1.2	2010	Tanzania	Wong et al. 2016	Global H58 Phylogeny
7468_7_89	ERR108688	4.3.1.2	2010	Tanzania	Wong et al. 2016	Global H58 Phylogeny
7468_7_90	ERR108689	4.3.1.2	2010	Tanzania	Wong et al. 2016	Global H58 Phylogeny
7468_7_92	ERR108691	4.3.1.2	2010	Tanzania	Wong et al. 2016	Global H58 Phylogeny
10493_1_17	ERR352442	4.3.1.1.EA1	2012	Africa	Wong et al. 2016	Global H58 Phylogeny
10607_2_1	ERR360793	4.3.1.1.EA1	2012	Malawi	Wong et al. 2016	Global H58 Phylogeny
10607_2_10	ERR360802	4.3.1.1.EA1	2010	Malawi	Wong et al. 2016	Global H58 Phylogeny
10607_2_13	ERR360805	4.3.1.1.EA1	2012	Malawi	Wong et al. 2016	Global H58 Phylogeny
10607_2_14	ERR360806	4.3.1.1.EA1	2012	Malawi	Wong et al. 2016	Global H58 Phylogeny
10607_2_15	ERR360807	4.3.1.1.EA1	2013	Malawi	Wong et al. 2016	Global H58 Phylogeny
10607_2_17	ERR360809	4.3.1.1.EA1	2013	Malawi	Wong et al. 2016	Global H58 Phylogeny
10607_2_18	ERR360810	4.3.1.1.EA1	2012	Malawi	Wong et al. 2016	Global H58 Phylogeny
10607_2_19	ERR360811	4.3.1.1.EA1	2012	Malawi	Wong et al. 2016	Global H58 Phylogeny
10607_2_2	ERR360794	4.3.1.1.EA1	2013	Malawi	Wong et al. 2016	Global H58 Phylogeny
10607_2_23	ERR360815	4.3.1.1.EA1	2013	Malawi	Wong et al. 2016	Global H58 Phylogeny
10607_2_24	ERR360816	4.3.1.1.EA1	2013	Malawi	Wong et al. 2016	Global H58 Phylogeny
10607_2_25	ERR360817	4.3.1.1.EA1	2012	Malawi	Wong et al. 2016	Global H58 Phylogeny
10607_2_26	ERR360818	4.3.1.1.EA1	2012	Malawi	Wong et al. 2016	Global H58 Phylogeny
10607_2_27	ERR360819	4.3.1.1.EA1	2013	Malawi	Wong et al. 2016	Global H58 Phylogeny
10607_2_35	ERR360827	4.3.1.1.EA1	2013	Malawi	Wong et al. 2016	Global H58 Phylogeny
10607_2_36	ERR360828	4.3.1.1.EA1	2012	Malawi	Wong et al. 2016	Global H58 Phylogeny
10607_2_37	ERR360829	4.3.1.1.EA1	2012	Malawi	Wong et al. 2016	Global H58 Phylogeny
10607_2_38	ERR360830	4.3.1.1.EA1	2013	Malawi	Wong et al. 2016	Global H58 Phylogeny
10607_2_5	ERR360797	4.3.1.1.EA1	2010	Malawi	Wong et al. 2016	Global H58 Phylogeny
10607_2_6	ERR360798	4.3.1.1.EA1	2010	Malawi	Wong et al. 2016	Global H58 Phylogeny
10607_2_7	ERR360799	4.3.1.1.EA1	2012	Malawi	Wong et al. 2016	Global H58 Phylogeny
10607_2_9	ERR360801	4.3.1.1.EA1	2010	Malawi	Wong et al. 2016	Global H58 Phylogeny
9475_6_12	ERR279109	4.3.1.1.EA1	2011	Malawi	Wong et al. 2016	Global H58 Phylogeny
9475_6_16	ERR279113	4.3.1.1.EA1	2012	Malawi	Wong et al. 2016	Global H58 Phylogeny
9475_6_17	ERR279114	4.3.1.1.EA1	2011	Malawi	Wong et al. 2016	Global H58 Phylogeny
9475_6_19	ERR279116	4.3.1.1.EA1	2011	Malawi	Wong et al. 2016	Global H58 Phylogeny
9475_6_2	ERR279099	4.3.1.1.EA1	2011	Malawi	Wong et al. 2016	Global H58 Phylogeny
9475_6_21	ERR279118	4.3.1.1.EA1	2011	Malawi	Wong et al. 2016	Global H58 Phylogeny
9475_6_24	ERR279121	4.3.1.1.EA1	2012	Malawi	Wong et al. 2016	Global H58 Phylogeny
9475_6_25	ERR279122	4.3.1.1.EA1	2011	Malawi	Wong et al. 2016	Global H58 Phylogeny
9475_6_26	ERR279123	4.3.1.1.EA1	2011	Malawi	Wong et al. 2016	Global H58 Phylogeny
9475_6_27	ERR279124	4.3.1.1.EA1	2011	Malawi	Wong et al. 2016	Global H58 Phylogeny
9475_6_28	ERR279125	4.3.1.1.EA1	2011	Malawi	Wong et al. 2016	Global H58 Phylogeny
9475_6_3	ERR279100	4.3.1.1.EA1	2011	Malawi	Wong et al. 2016	Global H58 Phylogeny
9475_6_31	ERR279128	4.3.1.1.EA1	2011	Malawi	Wong et al. 2016	Global H58 Phylogeny
9475_6_32	ERR279129	4.3.1.1.EA1	2012	Malawi	Wong et al. 2016	Global H58 Phylogeny
9475_6_33	ERR279130	4.3.1.1.EA1	2011	Malawi	Wong et al. 2016	Global H58 Phylogeny
9475_6_34	ERR279131	4.3.1.1.EA1	2011	Malawi	Wong et al. 2016	Global H58 Phylogeny
9475_6_35	ERR279132	4.3.1.1.EA1	2011	Malawi	Wong et al. 2016	Global H58 Phylogeny
9475_6_36	ERR279133	4.3.1.1.EA1	2011	Malawi	Wong et al. 2016	Global H58 Phylogeny
9475_6_39	ERR279136	4.3.1.1.EA1	2012	Malawi	Wong et al. 2016	Global H58 Phylogeny
9475_6_4	ERR279101	4.3.1.1.EA1	2011	Malawi	Wong et al. 2016	Global H58 Phylogeny
9475_6_41	ERR279138	4.3.1.1.EA1	2011	Malawi	Wong et al. 2016	Global H58 Phylogeny
9475_6_45	ERR279142	4.3.1.1.EA1	2011	Malawi	Wong et al. 2016	Global H58 Phylogeny
9475_6_47	ERR279144	4.3.1.1.EA1	2012	Malawi	Wong et al. 2016	Global H58 Phylogeny
9475_6_5	ERR279102	4.3.1.1.EA1	2011	Malawi	Wong et al. 2016	Global H58 Phylogeny
9475_6_50	ERR279147	4.3.1.1.EA1	2011	Malawi	Wong et al. 2016	Global H58 Phylogeny
9475_6_51	ERR279148	4.3.1.1.EA1	2011	Malawi	Wong et al. 2016	Global H58 Phylogeny
9475_6_52	ERR279149	4.3.1.1.EA1	2011	Malawi	Wong et al. 2016	Global H58 Phylogeny
9475_6_53	ERR279150	4.3.1.1.EA1	2011	Malawi	Wong et al. 2016	Global H58 Phylogeny
9475_6_54	ERR279151	4.3.1.1.EA1	2011	Malawi	Wong et al. 2016	Global H58 Phylogeny
9475_6_55	ERR279152	4.3.1.1.EA1	2012	Malawi	Wong et al. 2016	Global H58 Phylogeny
9475_6_58	ERR279155	4.3.1.1.EA1	2011	Malawi	Wong et al. 2016	Global H58 Phylogeny
9475_6_59	ERR279156	4.3.1.1.EA1	2011	Malawi	Wong et al. 2016	Global H58 Phylogeny
9475_6_6	ERR279103	4.3.1.1.EA1	2011	Malawi	Wong et al. 2016	Global H58 Phylogeny
9475_6_61	ERR279158	4.3.1.1.EA1	2012	Malawi	Wong et al. 2016	Global H58 Phylogeny
9475_6_62	ERR279159	4.3.1.1.EA1	2012	Malawi	Wong et al. 2016	Global H58 Phylogeny
9475_6_63	ERR279160	4.3.1.1.EA1	2012	Malawi	Wong et al. 2016	Global H58 Phylogeny
9475_6_65	ERR279162	4.3.1.1.EA1	2011	Malawi	Wong et al. 2016	Global H58 Phylogeny
9475_6_66	ERR279163	4.3.1.1.EA1	2011	Malawi	Wong et al. 2016	Global H58 Phylogeny
9475_6_67	ERR279164	4.3.1.1.EA1	2011	Malawi	Wong et al. 2016	Global H58 Phylogeny
9475_6_68	ERR279165	4.3.1.1.EA1	2011	Malawi	Wong et al. 2016	Global H58 Phylogeny
9475_6_69	ERR279166	4.3.1.1.EA1	2012	Malawi	Wong et al. 2016	Global H58 Phylogeny
9475_6_71	ERR279168	4.3.1.1.EA1	2012	Malawi	Wong et al. 2016	Global H58 Phylogeny
9475_6_73	ERR279170	4.3.1.1.EA1	2011	Malawi	Wong et al. 2016	Global H58 Phylogeny
9475_6_76	ERR279173	4.3.1.1.EA1	2011	Malawi	Wong et al. 2016	Global H58 Phylogeny
9475_6_77	ERR279174	4.3.1.1.EA1	2012	Malawi	Wong et al. 2016	Global H58 Phylogeny
9475_6_78	ERR279175	4.3.1.1.EA1	2012	Malawi	Wong et al. 2016	Global H58 Phylogeny
9475_6_79	ERR279176	4.3.1.1.EA1	2012	Malawi	Wong et al. 2016	Global H58 Phylogeny
9475_6_8	ERR279105	4.3.1.1.EA1	2012	Malawi	Wong et al. 2016	Global H58 Phylogeny
9475_6_9	ERR279106	4.3.1.1.EA1	2011	Malawi	Wong et al. 2016	Global H58 Phylogeny
10607_2_32	ERR360824	4.3.1.2	2010	Malawi	Wong et al. 2016	Global H58 Phylogeny
10607_2_40	ERR360832	4.3.1.2	2010	Malawi	Wong et al. 2016	Global H58 Phylogeny
10492_1_60	ERR352313	4.3.1.1	1992	Fiji	Wong et al. 2016	Global H58 Phylogeny
10492_1_62	ERR352315	4.3.1.1	1993	Fiji	Wong et al. 2016	Global H58 Phylogeny
10493_1_73	ERR352498	4.3.1.1	1993	Fiji	Wong et al. 2016	Global H58 Phylogeny
10541_2_44	ERR357469	4.3.1.1	1992	Fiji	Wong et al. 2016	Global H58 Phylogeny
10541_2_49	ERR357474	4.3.1.1	1993	Fiji	Wong et al. 2016	Global H58 Phylogeny
10541_2_50	ERR357475	4.3.1.1	1993	Fiji	Wong et al. 2016	Global H58 Phylogeny
10541_2_51	ERR357476	4.3.1.1	1993	Fiji	Wong et al. 2016	Global H58 Phylogeny
10562_2_48	ERR357803	4.3.1.1	1992	Fiji	Wong et al. 2016	Global H58 Phylogeny
10562_2_52	ERR357807	4.3.1.1	1993	Fiji	Wong et al. 2016	Global H58 Phylogeny
8490_6_55	ERR213273	4.3.1.1	1995	Fiji	Wong et al. 2016	Global H58 Phylogeny
8490_6_67	ERR213285	4.3.1.1	1994	Fiji	Wong et al. 2016	Global H58 Phylogeny
10562_2_9	ERR357764	4.3.1.1	2012	Australia	Wong et al. 2016	Global H58 Phylogeny
10071_3_26	ERR338002	4.3.1.1.EA1	2005	S.Africa	Wong et al. 2016	Global H58 Phylogeny
10071_3_47	ERR338023	4.3.1.1.EA1	2010	S.Africa	Wong et al. 2016	Global H58 Phylogeny
10071_3_58	ERR338034	4.3.1.1.EA1	2011	S.Africa	Wong et al. 2016	Global H58 Phylogeny
10071_3_60	ERR338036	4.3.1.1.EA1	2012	S.Africa	Wong et al. 2016	Global H58 Phylogeny
10071_3_50	ERR338026	4.3.1.3	2010	S.Africa	Wong et al. 2016	Global H58 Phylogeny
22204_7_208	ERR3332581	4.3.1.2.EA2	2016	Kenya	This study	Global H58 Phylogeny
22204_7_161	ERR3332562	4.3.1.1.EA1	2013	Kenya	This study	Global H58 Phylogeny
22306_3_138	ERR3332690	4.3.1.2.EA2	2015	Kenya	This study	Global H58 Phylogeny
22204_7_111	ERR3332545	4.3.1.2.EA2	2015	Kenya	This study	Global H58 Phylogeny
24276_3_185	ERR2909537	4.3.1.2.EA2	2016	Kenya	This study	Global H58 Phylogeny
22306_3_93	ERR3332660	4.3.1.2.EA2	2016	Kenya	This study	Global H58 Phylogeny
22204_7_237	ERR3332585	4.3.1.2.EA2	2015	Kenya	This study	Global H58 Phylogeny
