# Supplementary material for: Multiple introductions of multidrug-resistant typhoid associated with acute infection and asymptomatic carriage, Kenya
Source: eLife journal article supplement (doi:10.7554/elife.67852), 2021-09-13
Supplement: supp [file elife-67852-supp-v1.zip › elife_poa_e67852_Supplementary_file_3.xlsx]

## Sheet: Supplementary_Table_3_Kenyan_se
Lane_and_tree_ID	Accession_number	Genotype	Year	Date	Country	Publication
16404_4_5	ERR984707	4.3.1.1	2012	2012-07-01	Kenya	Park et al. 2018
16404_4_75	ERR984776	4.3.1.1	2012	2012-07-01	Kenya	Park et al. 2018
16404_5_36	ERR984827	4.3.1.1	2012	2012-07-01	Kenya	Park et al. 2018
16404_5_43	ERR984834	4.3.1.1	2012	2012-07-01	Kenya	Park et al. 2018
16404_5_67	ERR984858	4.3.1.1	2012	2012-07-01	Kenya	Park et al. 2018
16549_7_4	ERR1010003	4.3.1.1	2012	2012-07-01	Kenya	Park et al. 2018
16404_4_46	ERR984748	4.3.1.1	2012	2012-07-01	Kenya	Park et al. 2018
16404_4_59	ERR984761	4.3.1.1	2012	2012-07-01	Kenya	Park et al. 2018
16404_4_65	ERR984767	4.3.1.1	2013	2013-07-01	Kenya	Park et al. 2018
16404_4_66	ERR984768	4.3.1.1	2012	2012-07-01	Kenya	Park et al. 2018
16404_4_73	ERR984774	4.3.1.1	2012	2012-07-01	Kenya	Park et al. 2018
16404_4_80	ERR984781	4.3.1.1	2012	2012-07-01	Kenya	Park et al. 2018
16404_4_87	ERR984788	4.3.1.1	2012	2012-07-01	Kenya	Park et al. 2018
16404_4_89	ERR984790	4.3.1.1	2013	2013-07-01	Kenya	Park et al. 2018
16404_5_35	ERR984826	4.3.1.1	2012	2012-07-01	Kenya	Park et al. 2018
16404_5_37	ERR984828	4.3.1.1	2012	2012-07-01	Kenya	Park et al. 2018
16404_5_44	ERR984835	4.3.1.1	2012	2012-07-01	Kenya	Park et al. 2018
16404_5_45	ERR984836	4.3.1.1	2013	2013-07-01	Kenya	Park et al. 2018
16404_5_51	ERR984842	4.3.1.1	2012	2012-07-01	Kenya	Park et al. 2018
16404_5_52	ERR984843	4.3.1.1	2012	2012-07-01	Kenya	Park et al. 2018
16404_5_53	ERR984844	4.3.1.1	2012	2012-07-01	Kenya	Park et al. 2018
16404_5_60	ERR984851	4.3.1.1	2012	2012-07-01	Kenya	Park et al. 2018
16404_5_68	ERR984859	4.3.1.1	2012	2012-07-01	Kenya	Park et al. 2018
16404_5_76	ERR984867	4.3.1.1	2012	2012-07-01	Kenya	Park et al. 2018
16404_5_77	ERR984868	4.3.1.1	2012	2012-07-01	Kenya	Park et al. 2018
16404_5_84	ERR984875	4.3.1.1	2012	2012-07-01	Kenya	Park et al. 2018
16404_5_85	ERR984876	4.3.1.1	2012	2012-07-01	Kenya	Park et al. 2018
16549_7_18	ERR1010016	4.3.1.1	2012	2012-07-01	Kenya	Park et al. 2018
16549_7_20	ERR1010018	4.3.1.1	2012	2012-07-01	Kenya	Park et al. 2018
16549_7_23	ERR1010021	4.3.1.1	2012	2012-07-01	Kenya	Park et al. 2018
16549_8_1	ERR1010089	4.3.1.1	2012	2012-07-01	Kenya	Park et al. 2018
16549_8_10	ERR1010098	4.3.1.1	2012	2012-07-01	Kenya	Park et al. 2018
16549_8_16	ERR1010104	4.3.1.1	2012	2012-07-01	Kenya	Park et al. 2018
16549_8_17	ERR1010105	4.3.1.1	2012	2012-07-01	Kenya	Park et al. 2018
16549_8_18	ERR1010106	4.3.1.1	2012	2012-07-01	Kenya	Park et al. 2018
16549_8_2	ERR1010090	4.3.1.1	2012	2012-07-01	Kenya	Park et al. 2018
16549_8_31	ERR1010119	4.3.1.1	2013	2013-07-01	Kenya	Park et al. 2018
16549_8_33	ERR1010121	4.3.1.1	2012	2012-07-01	Kenya	Park et al. 2018
16549_8_47	ERR1010133	4.3.1.1	2012	2012-07-01	Kenya	Park et al. 2018
16549_8_48	ERR1010134	4.3.1.1	2012	2012-07-01	Kenya	Park et al. 2018
16549_8_54	ERR1010140	4.3.1.1	2012	2012-07-01	Kenya	Park et al. 2018
16549_8_63	ERR1010148	4.3.1.1	2012	2012-07-01	Kenya	Park et al. 2018
16549_8_8	ERR1010096	4.3.1.1	2012	2012-07-01	Kenya	Park et al. 2018
16549_8_9	ERR1010097	4.3.1.1	2012	2012-07-01	Kenya	Park et al. 2018
16404_5_75	ERR984866	4.3.1.1	2012	2012-07-01	Kenya	Park et al. 2018
16404_4_82	ERR984783	4.3.1.1	2012	2012-07-01	Kenya	Park et al. 2018
16404_4_53	ERR984755	4.3.1.1	2012	2012-07-01	Kenya	Park et al. 2018
16549_8_26	ERR1010114	4.3.1.1	2012	2012-07-01	Kenya	Park et al. 2018
16404_5_59	ERR984850	4.3.1.1	2012	2012-07-01	Kenya	Park et al. 2018
16404_5_61	ERR984852	4.3.1.1	2012	2012-07-01	Kenya	Park et al. 2018
16404_6_3	ERR984885	4.3.1.1	2012	2012-07-01	Kenya	Park et al. 2018
16404_6_35	ERR984917	4.3.1.1	2012	2012-07-01	Kenya	Park et al. 2018
16549_8_25	ERR1010113	4.3.1.1	2012	2012-07-01	Kenya	Park et al. 2018
16549_8_7	ERR1010095	4.3.1.1	2013	2013-07-01	Kenya	Park et al. 2018
16549_8_71	ERR1010156	4.3.1.1	2012	2012-07-01	Kenya	Park et al. 2018
10071_8_62	ERR338131	4.3.1.1	2007	2007-07-01	Kenya	Wong et al. 2016
10071_8_63	ERR338132	4.3.1.1	2008	2008-07-01	Kenya	Wong et al. 2016
10071_8_64	ERR338133	4.3.1.1	2007	2007-07-01	Kenya	Wong et al. 2016
10071_8_67	ERR338136	4.3.1.1	2008	2008-07-01	Kenya	Wong et al. 2016
10071_8_68	ERR338137	4.3.1.1	2007	2007-07-01	Kenya	Wong et al. 2016
10071_8_70	ERR338139	4.3.1.1	2008	2008-07-01	Kenya	Wong et al. 2016
10071_8_71	ERR338140	4.3.1.1	2009	2009-07-01	Kenya	Wong et al. 2016
10071_8_72	ERR338141	4.3.1.1	2007	2007-07-01	Kenya	Wong et al. 2016
10071_8_74	ERR338143	4.3.1.1	2008	2008-07-01	Kenya	Wong et al. 2016
10071_8_76	ERR338145	4.3.1.1	2007	2007-07-01	Kenya	Wong et al. 2016
10071_8_78	ERR338147	4.3.1.1	2008	2008-07-01	Kenya	Wong et al. 2016
10071_8_79	ERR338148	4.3.1.1	2007	2007-07-01	Kenya	Wong et al. 2016
10071_8_82	ERR338151	4.3.1.1	2008	2008-07-01	Kenya	Wong et al. 2016
10071_8_83	ERR338152	4.3.1.1	2007	2007-07-01	Kenya	Wong et al. 2016
10071_8_88	ERR338157	4.3.1.1	2007	2007-07-01	Kenya	Wong et al. 2016
10071_8_90	ERR338159	4.3.1.1	2009	2009-07-01	Kenya	Wong et al. 2016
10071_8_91	ERR338160	4.3.1.1	2008	2008-07-01	Kenya	Wong et al. 2016
10071_8_94	ERR338163	4.3.1.1	2008	2008-07-01	Kenya	Wong et al. 2016
10071_8_95	ERR338164	4.3.1.1	2007	2007-07-01	Kenya	Wong et al. 2016
8525_2_54	ERR212564	4.3.1.1	2008	2008-07-01	Kenya	Wong et al. 2016
8525_3_30	ERR212636	4.3.1.1	2008	2008-07-01	Kenya	Wong et al. 2016
8525_3_32	ERR212638	4.3.1.1	2008	2008-07-01	Kenya	Wong et al. 2016
8525_3_33	ERR212639	4.3.1.1	2008	2008-07-01	Kenya	Wong et al. 2016
8525_3_34	ERR212640	4.3.1.1	2008	2008-07-01	Kenya	Wong et al. 2016
8525_3_37	ERR212643	4.3.1.1	2008	2008-07-01	Kenya	Wong et al. 2016
8525_3_40	ERR212646	4.3.1.1	2008	2008-07-01	Kenya	Wong et al. 2016
8525_3_42	ERR212648	4.3.1.1	2008	2008-07-01	Kenya	Wong et al. 2016
8525_3_45	ERR212651	4.3.1.1	2008	2008-07-01	Kenya	Wong et al. 2016
8525_3_46	ERR212652	4.3.1.1	2008	2008-07-01	Kenya	Wong et al. 2016
8525_3_47	ERR212653	4.3.1.1	2008	2008-07-01	Kenya	Wong et al. 2016
8525_3_48	ERR212654	4.3.1.1	2008	2008-07-01	Kenya	Wong et al. 2016
8525_3_49	ERR212655	4.3.1.1	2008	2008-07-01	Kenya	Wong et al. 2016
8525_3_51	ERR212657	4.3.1.1	2008	2008-07-01	Kenya	Wong et al. 2016
8525_3_53	ERR212659	4.3.1.1	2008	2008-07-01	Kenya	Wong et al. 2016
8525_3_54	ERR212660	4.3.1.1	2008	2008-07-01	Kenya	Wong et al. 2016
8525_3_55	ERR212661	4.3.1.1	2008	2008-07-01	Kenya	Wong et al. 2016
8525_3_56	ERR212662	4.3.1.1	2008	2008-07-01	Kenya	Wong et al. 2016
8525_3_58	ERR212664	4.3.1.1	2008	2008-07-01	Kenya	Wong et al. 2016
8525_3_59	ERR212665	4.3.1.1	2008	2008-07-01	Kenya	Wong et al. 2016
8525_3_60	ERR212666	4.3.1.1	2008	2008-07-01	Kenya	Wong et al. 2016
8525_3_61	ERR212667	4.3.1.1	2008	2008-07-01	Kenya	Wong et al. 2016
8615_4_29	ERR217406	4.3.1.1	2004	2004-07-01	Kenya	Wong et al. 2016
16404_4_39	ERR984741	4.3.1.2	2013	2013-07-01	Kenya	Park et al. 2018
16404_5_69	ERR984860	4.3.1.2	2013	2013-07-01	Kenya	Park et al. 2018
16549_7_5	ERR1010004	4.3.1.2	2013	2013-07-01	Kenya	Park et al. 2018
16549_8_34	ERR1010122	4.3.1.2	2013	2013-07-01	Kenya	Park et al. 2018
10071_8_65	ERR338134	4.3.1.2	2007	2007-07-01	Kenya	Wong et al. 2016
10071_8_66	ERR338135	4.3.1.2	2007	2007-07-01	Kenya	Wong et al. 2016
10071_8_69	ERR338138	4.3.1.2	2007	2007-07-01	Kenya	Wong et al. 2016
10071_8_77	ERR338146	4.3.1.2	2007	2007-07-01	Kenya	Wong et al. 2016
10071_8_80	ERR338149	4.3.1.2	2007	2007-07-01	Kenya	Wong et al. 2016
10071_8_81	ERR338150	4.3.1.2	2007	2007-07-01	Kenya	Wong et al. 2016
10071_8_89	ERR338158	4.3.1.2	2007	2007-07-01	Kenya	Wong et al. 2016
10071_8_92	ERR338161	4.3.1.2	2008	2008-07-01	Kenya	Wong et al. 2016
8525_3_31	ERR212637	4.3.1.2	2008	2008-07-01	Kenya	Wong et al. 2016
8525_3_71	ERR212677	4.3.1.2	2001	2001-07-01	Kenya	Wong et al. 2016
22204_7_274	ERR3332596	4.3.1.1	2014	2014-01-16	Kenya	This study
24276_3_143	ERR3332776	4.3.1.2	2016	2016-07-18	Kenya	This study
22306_3_253	ERR3332773	4.3.1.2	2016	2016-07-11	Kenya	This study
22306_3_248	ERR3332770	4.3.1.2	2014	2014-09-22	Kenya	This study
22306_3_247	ERR3332769	4.3.1.1	2014	2014-09-15	Kenya	This study
22306_3_244	ERR3332766	4.3.1.2	2016	2016-07-13	Kenya	This study
22306_3_228	ERR3332758	4.3.1.2	2014	2014-09-08	Kenya	This study
22306_3_225	ERR3332755	4.3.1.1	2014	2014-03-10	Kenya	This study
22306_3_218	ERR3332750	4.3.1.1	2015	2015-03-12	Kenya	This study
22306_3_207	ERR3332746	4.3.1.1	2014	2014-07-21	Kenya	This study
22306_3_206	ERR3332745	4.3.1.1	2013	2013-09-03	Kenya	This study
22306_3_205	ERR3332744	4.3.1.1	2013	2013-09-23	Kenya	This study
22306_3_204	ERR3332743	4.3.1.2	2014	2014-03-05	Kenya	This study
22306_3_200	ERR3332740	4.3.1.2	2014	2014-05-26	Kenya	This study
22306_3_197	ERR3332737	4.3.1.1	2014	2014-09-01	Kenya	This study
24276_3_244	ERR2909580	4.3.1.2	2014	2014-03-03	Kenya	This study
22306_3_191	ERR3332731	4.3.1.2	2013	2013-12-07	Kenya	This study
22306_3_188	ERR3332729	4.3.1.2	2014	2014-04-03	Kenya	This study
22306_3_185	ERR3332727	4.3.1.2	2014	2014-03-05	Kenya	This study
22306_3_184	ERR3332726	4.3.1.1	2014	2014-06-16	Kenya	This study
22204_8_178	ERR4921815	4.3.1.1	2013	2013-09-04	Kenya	This study
22306_3_177	ERR3332719	4.3.1.2	2013	2013-09-04	Kenya	This study
24276_3_194	ERR2909540	4.3.1.1	2014	2014-07-08	Kenya	This study
22306_3_85	ERR3332652	4.3.1.2	2014	2014-03-06	Kenya	This study
22306_3_75	ERR3332648	4.3.1.2	2013	2013-09-30	Kenya	This study
22306_3_68	ERR3332643	4.3.1.1	2014	2014-07-03	Kenya	This study
22306_3_67	ERR3332642	4.3.1.2	2014	2014-07-09	Kenya	This study
22306_3_66	ERR3332641	4.3.1.1	2014	2014-02-13	Kenya	This study
22306_3_56	ERR3332634	4.3.1.1	2013	2013-09-03	Kenya	This study
22306_3_55	ERR3332633	4.3.1.1	2014	2014-06-11	Kenya	This study
22306_3_38	ERR3332623	4.3.1.1	2013	2013-09-26	Kenya	This study
24276_3_113	ERR2909474	4.3.1.1	2015	2015-08-28	Kenya	This study
22306_3_27	ERR3332617	4.3.1.2	2015	2015-08-11	Kenya	This study
22306_3_164	ERR3332709	4.3.1.2	2015	2015-07-23	Kenya	This study
24276_3_184	ERR2909536	4.3.1.2	2016	2016-03-29	Kenya	This study
22306_3_155	ERR3332701	4.3.1.1	2015	2015-07-08	Kenya	This study
22306_3_147	ERR3332694	4.3.1.1	2016	2016-05-03	Kenya	This study
24276_3_168	ERR2909520	4.3.1.2	2015	2015-07-02	Kenya	This study
22306_3_140	ERR3332691	4.3.1.2	2015	2015-07-02	Kenya	This study
22306_3_138	ERR3332690	4.3.1.2	2015	2015-07-03	Kenya	This study
24276_3_116	ERR2909477	4.3.1.1	2015	2015-09-28	Kenya	This study
22306_3_129	ERR3332685	4.3.1.2	2016	2016-06-13	Kenya	This study
22306_3_126	ERR3332684	4.3.1.2	2014	2014-07-23	Kenya	This study
24276_3_185	ERR2909537	4.3.1.2	2016	2016-04-06	Kenya	This study
22306_3_116	ERR3332677	4.3.1.1	2016	2016-06-07	Kenya	This study
22306_3_115	ERR3332676	4.3.1.1	2016	2016-06-02	Kenya	This study
22306_3_108	ERR3332669	4.3.1.2	2015	2015-07-08	Kenya	This study
22306_3_96	ERR3332662	4.3.1.2	2014	2014-02-04	Kenya	This study
22306_3_93	ERR3332660	4.3.1.2	2016	2016-01-11	Kenya	This study
22306_3_92	ERR3332659	4.3.1.2	2015	2015-11-02	Kenya	This study
24276_3_171	ERR2909523	4.3.1.2	2015	2015-10-01	Kenya	This study
24276_3_170	ERR2909522	4.3.1.2	2015	2015-08-13	Kenya	This study
24276_3_214	ERR2909557	4.3.1.1	2013	2013-10-12	Kenya	This study
24276_3_115	ERR2909476	4.3.1.2	2015	2015-09-14	Kenya	This study
24276_3_277	ERR2909611	4.3.1.1	2013	2013-11-21	Kenya	This study
24276_3_249	ERR2909585	4.3.1.2	2013	2013-09-23	Kenya	This study
24276_3_129	ERR2909490	4.3.1.2	2016	2016-02-10	Kenya	This study
24276_3_126	ERR2909487	4.3.1.1	2016	2016-01-26	Kenya	This study
24276_3_180	ERR2909532	4.3.1.1	2016	2016-02-08	Kenya	This study
22204_7_161	ERR3332562	4.3.1.1	2013	2013-11-11	Kenya	This study
24276_3_278	ERR2909612	4.3.1.2	2013	2013-11-27	Kenya	This study
24276_3_248	ERR2909584	4.3.1.2	2013	2013-09-23	Kenya	This study
24276_3_197	ERR2909543	4.3.1.2	2013	2013-08-20	Kenya	This study
24276_3_256	ERR2909592	4.3.1.1	2015	2015-06-03	Kenya	This study
24276_3_177	ERR2909529	4.3.1.2	2016	2016-01-28	Kenya	This study
24276_3_155	ERR2909508	4.3.1.1	2015	2015-03-17	Kenya	This study
24276_3_247	ERR2909583	4.3.1.2	2013	2013-09-23	Kenya	This study
24276_3_159	ERR2909511	4.3.1.2	2015	2015-05-05	Kenya	This study
24276_3_193	ERR2909539	4.3.1.2	2014	2014-04-28	Kenya	This study
24276_3_164	ERR2909516	4.3.1.2	2014	2014-10-16	Kenya	This study
22204_7_146	ERR3332556	4.3.1.2	2013	2013-08-29	Kenya	This study
22204_7_145	ERR3332555	4.3.1.1	2016	2016-03-01	Kenya	This study
24276_3_122	ERR2909483	4.3.1.1	2015	2015-11-17	Kenya	This study
22204_7_142	ERR2525481	4.3.1.1	2015	2015-11-09	Kenya	This study
24276_3_135	ERR2909496	4.3.1.2	2016	2016-02-24	Kenya	This study
24276_3_226	ERR2909568	4.3.1.1	2016	2016-02-08	Kenya	This study
24276_3_153	ERR2909506	4.3.1.2	2015	2015-03-04	Kenya	This study
24276_3_157	ERR2909509	4.3.1.2	2015	2015-04-21	Kenya	This study
22204_7_130	ERR3332551	4.3.1.1	2015	2015-04-24	Kenya	This study
22204_7_122	ERR3332548	4.3.1.1	2015	2015-06-23	Kenya	This study
22204_7_115	ERR3332546	4.3.1.2	2015	2015-04-08	Kenya	This study
22204_7_111	ERR3332545	4.3.1.2	2015	2015-06-11	Kenya	This study
22204_7_107	ERR3332543	4.3.1.2	2015	2015-11-23	Kenya	This study
22204_7_105	ERR3332542	4.3.1.2	2015	2015-11-13	Kenya	This study
22204_7_104	ERR3332541	4.3.1.2	2015	2015-11-11	Kenya	This study
22204_7_97	ERR3332539	4.3.1.1	2016	2016-02-08	Kenya	This study
24276_3_272	ERR2909608	4.3.1.2	2016	2016-03-09	Kenya	This study
22204_7_95	ERR2525467	4.3.1.1	2016	2016-03-09	Kenya	This study
22204_7_262	ERR2525516	4.3.1.2	2015	2015-05-07	Kenya	This study
22204_7_261	ERR2525515	4.3.1.1	2015	2015-06-29	Kenya	This study
22204_7_258	ERR3332591	4.3.1.2	2015	2015-02-17	Kenya	This study
22204_7_256	ERR3332589	4.3.1.2	2015	2015-04-27	Kenya	This study
22204_7_251	ERR2525508	4.3.1.2	2015	2015-03-18	Kenya	This study
22204_7_243	ERR3332587	4.3.1.2	2015	2015-02-26	Kenya	This study
24276_3_152	ERR2909505	4.3.1.1	2015	2015-02-19	Kenya	This study
22204_7_239	ERR3332586	4.3.1.2	2015	2015-06-03	Kenya	This study
24276_3_160	ERR2909512	4.3.1.2	2015	2015-05-26	Kenya	This study
24276_3_162	ERR2909514	4.3.1.2	2015	2015-06-08	Kenya	This study
22204_7_237	ERR3332585	4.3.1.2	2015	2015-06-12	Kenya	This study
22204_7_236	ERR2525501	4.3.1.2	2015	2015-06-12	Kenya	This study
24276_3_163	ERR2909515	4.3.1.2	2015	2015-06-15	Kenya	This study
22204_7_232	ERR3332584	4.3.1.2	2015	2015-05-21	Kenya	This study
22204_7_223	ERR2525493	4.3.1.2	2015	2015-04-13	Kenya	This study
22204_7_219	ERR2525491	4.3.1.2	2015	2015-05-12	Kenya	This study
24276_3_142	ERR2909503	4.3.1.1	2015	2015-01-15	Kenya	This study
24276_3_141	ERR2909502	4.3.1.2	2015	2015-01-13	Kenya	This study
22204_7_216	ERR2525488	4.3.1.1	2015	2015-01-14	Kenya	This study
22204_7_215	ERR2525487	4.3.1.1	2016	2016-02-25	Kenya	This study
24276_3_161	ERR2909513	4.3.1.2	2015	2015-06-08	Kenya	This study
22204_7_210	ERR2525484	4.3.1.2	2015	2015-10-19	Kenya	This study
24276_3_167	ERR2909519	4.3.1.2	2015	2015-06-04	Kenya	This study
22204_7_209	ERR2525483	4.3.1.2	2015	2015-10-26	Kenya	This study
24276_3_134	ERR2909495	4.3.1.1	2016	2016-02-24	Kenya	This study
24276_3_182	ERR2909534	4.3.1.2	2016	2016-02-22	Kenya	This study
22204_7_208	ERR3332581	4.3.1.2	2016	2016-11-09	Kenya	This study
22204_7_207	ERR3332580	4.3.1.2	2016	2016-11-17	Kenya	This study
24276_3_146	ERR3332777	4.3.1.1	2016	2016-10-03	Kenya	This study
22204_7_193	ERR3332578	4.3.1.2	2016	2016-09-26	Kenya	This study
22204_7_188	ERR3332577	4.3.1.2	2016	2016-10-25	Kenya	This study
24276_3_149	ERR3332778	4.3.1.1	2016	2016-10-26	Kenya	This study
22204_7_185	ERR3332576	4.3.1.1	2016	2016-10-11	Kenya	This study
22204_7_184	ERR3332575	4.3.1.1	2016	2016-10-11	Kenya	This study
22204_7_181	ERR3332574	4.3.1.2	2016	2016-10-24	Kenya	This study
24276_3_276	ERR3332782	4.3.1.2	2016	2016-10-25	Kenya	This study
24276_3_150	ERR3332779	4.3.1.1	2016	2016-11-03	Kenya	This study
24276_3_238	ERR3332780	4.3.1.1	2016	2016-10-10	Kenya	This study
22204_7_180	ERR3332573	4.3.1.1	2016	2016-10-13	Kenya	This study
22306_3_57	ERR3332635	4.3.1.2	2014	2014-10-10	Kenya	This study
