# Supplementary material for: Multiple introductions of multidrug-resistant typhoid associated with acute infection and asymptomatic carriage, Kenya
Source: eLife journal article supplement (doi:10.7554/elife.67852), 2021-09-13
Supplement: supp [file elife-67852-supp-v1.zip › elife_poa_e67852_Supplementary_file_4.xlsx]

## Sheet: Supplementary_Table_4_IncHI1_Pl
Tree_tip_ID	Accession_number_reads	Country	Year	Publication	Host_Genotype	IncHI1_PST_cluster	IncHI1_PST6_plasmid_haplotype
9475_4_54	ERR279350	India	2006	Wong et al 2016	4.3.1.2	6	CGTAGTCGTAGGGTCCCGGCGGGTT
9475_4_55	ERR279351	India	2006	Wong et al 2016	4.3.1.2	6	CGTAGTCGTAGGGTCCCGGCGGGTT
10425_1_62	ERR349392	Vietnam	1994	Wong et al 2016	4.3.1.1	6	CGCGGTCGTAGGGTCCCGCCGGGTT
22306_3_116	ERR3332677	Kenya	2016	This study	4.3.1.1.EA1	6	CGCAGTTGTAGGGTCCCGCCGGGTT
10540_1_29	ERR352626	Vietnam	1995	Wong et al 2016	4.3.1.1	6	CGCAGTCGTGGGGTCCCGCCGGGTT
10209_5_2	ERR340758	Cambodia	2007	Wong et al 2016	4.3.1.1	6	CGCAGTCGTATGGTCCCGCCGGGTT
10540_1_91	ERR352715	Vietnam	1994	Wong et al 2016	4.3.1.1	6	CGCAGTCGTATGGTCCCGCCGGGTT
10607_2_53	ERR360845	Cambodia	2010	Wong et al 2016	4.3.1.1	6	CGCAGTCGTATGGTCCCGCCGGGTT
10592_2_32	ERR360480	Pakistan	2003	Wong et al 2016	4.3.1.1	6	CGCAGTCGTAGGGTTCCGCCGGGTT
11642_2_56	ERR422803	Pakistan	2011	Wong et al 2016	4.3.1	6	CGCAGTCGTAGGGTCCTGCCGGGTT
10060_5_2	ERR331205	Cambodia	2012	Wong et al 2016	4.3.1.1	6	CGCAGTCGTAGGGTCCCGCCGGGTT
10060_5_3	ERR331206	Cambodia	2012	Wong et al 2016	4.3.1.1	6	CGCAGTCGTAGGGTCCCGCCGGGTT
10060_5_4	ERR331207	Cambodia	2012	Wong et al 2016	4.3.1.1	6	CGCAGTCGTAGGGTCCCGCCGGGTT
10060_5_5	ERR331208	Cambodia	2012	Wong et al 2016	4.3.1.1	6	CGCAGTCGTAGGGTCCCGCCGGGTT
10071_8_65	ERR338134	Kenya	2007	Wong et al 2016	4.3.1.2.EA2	6	CGCAGTCGTAGGGTCCCGCCGGGTT
10071_8_66	ERR338135	Kenya	2007	Wong et al 2016	4.3.1.2.EA2	6	CGCAGTCGTAGGGTCCCGCCGGGTT
10071_8_69	ERR338138	Kenya	2007	Wong et al 2016	4.3.1.2.EA2	6	CGCAGTCGTAGGGTCCCGCCGGGTT
10071_8_80	ERR338149	Kenya	2007	Wong et al 2016	4.3.1.2.EA2	6	CGCAGTCGTAGGGTCCCGCCGGGTT
10071_8_81	ERR338150	Kenya	2007	Wong et al 2016	4.3.1.2.EA2	6	CGCAGTCGTAGGGTCCCGCCGGGTT
10071_8_89	ERR338158	Kenya	2007	Wong et al 2016	4.3.1.2.EA2	6	CGCAGTCGTAGGGTCCCGCCGGGTT
10209_5_1	ERR340757	Cambodia	2007	Wong et al 2016	4.3.1.1	6	CGCAGTCGTAGGGTCCCGCCGGGTT
10209_5_10	ERR340766	Cambodia	2007	Wong et al 2016	4.3.1.1	6	CGCAGTCGTAGGGTCCCGCCGGGTT
10209_5_12	ERR340768	Cambodia	2007	Wong et al 2016	4.3.1.1	6	CGCAGTCGTAGGGTCCCGCCGGGTT
10209_5_14	ERR340770	Cambodia	2007	Wong et al 2016	4.3.1.1	6	CGCAGTCGTAGGGTCCCGCCGGGTT
10209_5_15	ERR340771	Cambodia	2007	Wong et al 2016	4.3.1.1	6	CGCAGTCGTAGGGTCCCGCCGGGTT
10209_5_16	ERR340772	Cambodia	2007	Wong et al 2016	4.3.1.1	6	CGCAGTCGTAGGGTCCCGCCGGGTT
10209_5_17	ERR340773	Cambodia	2007	Wong et al 2016	4.3.1.1	6	CGCAGTCGTAGGGTCCCGCCGGGTT
10209_5_19	ERR340775	Cambodia	2007	Wong et al 2016	4.3.1.1	6	CGCAGTCGTAGGGTCCCGCCGGGTT
10209_5_4	ERR340760	Cambodia	2007	Wong et al 2016	4.3.1.1	6	CGCAGTCGTAGGGTCCCGCCGGGTT
10209_5_5	ERR340761	Cambodia	2007	Wong et al 2016	4.3.1.1	6	CGCAGTCGTAGGGTCCCGCCGGGTT
10209_5_7	ERR340763	Cambodia	2007	Wong et al 2016	4.3.1.1	6	CGCAGTCGTAGGGTCCCGCCGGGTT
10425_1_1	ERR349331	Vietnam	1994	Wong et al 2016	4.3.1.1	6	CGCAGTCGTAGGGTCCCGCCGGGTT
10425_1_16	ERR349346	Vietnam	1995	Wong et al 2016	4.3.1.1	6	CGCAGTCGTAGGGTCCCGCCGGGTT
10425_1_17	ERR349347	Vietnam	1994	Wong et al 2016	4.3.1.1	6	CGCAGTCGTAGGGTCCCGCCGGGTT
10425_1_18	ERR349348	Vietnam	1995	Wong et al 2016	4.3.1.1	6	CGCAGTCGTAGGGTCCCGCCGGGTT
10425_1_23	ERR349353	Vietnam	1995	Wong et al 2016	4.3.1.1	6	CGCAGTCGTAGGGTCCCGCCGGGTT
10425_1_24	ERR349354	Vietnam	1995	Wong et al 2016	4.3.1.1	6	CGCAGTCGTAGGGTCCCGCCGGGTT
10425_1_27	ERR349357	Vietnam	1995	Wong et al 2016	4.3.1.1	6	CGCAGTCGTAGGGTCCCGCCGGGTT
10425_1_29	ERR349359	Vietnam	1994	Wong et al 2016	4.3.1.1	6	CGCAGTCGTAGGGTCCCGCCGGGTT
10425_1_30	ERR349360	Vietnam	1995	Wong et al 2016	4.3.1.1	6	CGCAGTCGTAGGGTCCCGCCGGGTT
10425_1_37	ERR349367	Vietnam	1995	Wong et al 2016	4.3.1.1	6	CGCAGTCGTAGGGTCCCGCCGGGTT
10425_1_42	ERR349372	Vietnam	1994	Wong et al 2016	4.3.1.1	6	CGCAGTCGTAGGGTCCCGCCGGGTT
10425_1_43	ERR349373	Vietnam	1997	Wong et al 2016	4.3.1.1	6	CGCAGTCGTAGGGTCCCGCCGGGTT
10425_1_45	ERR349375	Vietnam	1993	Wong et al 2016	4.3.1.1	6	CGCAGTCGTAGGGTCCCGCCGGGTT
10425_1_48	ERR349378	Vietnam	1997	Wong et al 2016	4.3.1.1	6	CGCAGTCGTAGGGTCCCGCCGGGTT
10425_1_51	ERR349381	Vietnam	1993	Wong et al 2016	4.3.1.1	6	CGCAGTCGTAGGGTCCCGCCGGGTT
10425_1_55	ERR349385	Vietnam	1994	Wong et al 2016	4.3.1.1	6	CGCAGTCGTAGGGTCCCGCCGGGTT
10425_1_57	ERR349387	Vietnam	1994	Wong et al 2016	4.3.1.1	6	CGCAGTCGTAGGGTCCCGCCGGGTT
10425_1_7	ERR349337	Vietnam	1994	Wong et al 2016	4.3.1.1	6	CGCAGTCGTAGGGTCCCGCCGGGTT
10425_1_73	ERR349403	Vietnam	1994	Wong et al 2016	4.3.1.1	6	CGCAGTCGTAGGGTCCCGCCGGGTT
10425_1_8	ERR349338	Vietnam	1995	Wong et al 2016	4.3.1.1	6	CGCAGTCGTAGGGTCCCGCCGGGTT
10426_1_1	ERR349523	Vietnam	1994	Wong et al 2016	4.3.1.1	6	CGCAGTCGTAGGGTCCCGCCGGGTT
10426_1_11	ERR349533	Vietnam	1996	Wong et al 2016	4.3.1.1	6	CGCAGTCGTAGGGTCCCGCCGGGTT
10426_1_14	ERR349536	Vietnam	1995	Wong et al 2016	4.3.1.1	6	CGCAGTCGTAGGGTCCCGCCGGGTT
10426_1_16	ERR349538	Vietnam	1995	Wong et al 2016	4.3.1.1	6	CGCAGTCGTAGGGTCCCGCCGGGTT
10426_1_17	ERR349539	Vietnam	1994	Wong et al 2016	4.3.1.1	6	CGCAGTCGTAGGGTCCCGCCGGGTT
10426_1_2	ERR349524	Vietnam	1994	Wong et al 2016	4.3.1.1	6	CGCAGTCGTAGGGTCCCGCCGGGTT
10426_1_23	ERR349545	Vietnam	1995	Wong et al 2016	4.3.1.1	6	CGCAGTCGTAGGGTCCCGCCGGGTT
10426_1_25	ERR349547	Vietnam	1995	Wong et al 2016	4.3.1.1	6	CGCAGTCGTAGGGTCCCGCCGGGTT
10426_1_26	ERR349548	Vietnam	1996	Wong et al 2016	4.3.1.1	6	CGCAGTCGTAGGGTCCCGCCGGGTT
10426_1_27	ERR349549	Vietnam	1995	Wong et al 2016	4.3.1.1	6	CGCAGTCGTAGGGTCCCGCCGGGTT
10426_1_28	ERR349550	Vietnam	1994	Wong et al 2016	4.3.1.1	6	CGCAGTCGTAGGGTCCCGCCGGGTT
10426_1_29	ERR349551	Vietnam	1995	Wong et al 2016	4.3.1.1	6	CGCAGTCGTAGGGTCCCGCCGGGTT
10426_1_30	ERR349552	Vietnam	1994	Wong et al 2016	4.3.1.1	6	CGCAGTCGTAGGGTCCCGCCGGGTT
10426_1_35	ERR349557	Vietnam	1994	Wong et al 2016	4.3.1.1	6	CGCAGTCGTAGGGTCCCGCCGGGTT
10426_1_40	ERR349562	Vietnam	1997	Wong et al 2016	4.3.1.1	6	CGCAGTCGTAGGGTCCCGCCGGGTT
10426_1_41	ERR349563	Vietnam	1995	Wong et al 2016	4.3.1.1	6	CGCAGTCGTAGGGTCCCGCCGGGTT
10426_1_42	ERR349564	Vietnam	1998	Wong et al 2016	4.3.1.1	6	CGCAGTCGTAGGGTCCCGCCGGGTT
10426_1_47	ERR349568	Vietnam	1997	Wong et al 2016	4.3.1.1	6	CGCAGTCGTAGGGTCCCGCCGGGTT
10426_1_49	ERR349570	Vietnam	1993	Wong et al 2016	4.3.1.1	6	CGCAGTCGTAGGGTCCCGCCGGGTT
10426_1_50	ERR349571	Vietnam	1997	Wong et al 2016	4.3.1.1	6	CGCAGTCGTAGGGTCCCGCCGGGTT
10426_1_51	ERR349572	Vietnam	1997	Wong et al 2016	4.3.1.1	6	CGCAGTCGTAGGGTCCCGCCGGGTT
10426_1_57	ERR349578	Vietnam	1994	Wong et al 2016	4.3.1.1	6	CGCAGTCGTAGGGTCCCGCCGGGTT
10426_1_58	ERR349579	Vietnam	1995	Wong et al 2016	4.3.1.1	6	CGCAGTCGTAGGGTCCCGCCGGGTT
10426_1_61	ERR349582	Vietnam	1997	Wong et al 2016	4.3.1.1	6	CGCAGTCGTAGGGTCCCGCCGGGTT
10426_1_62	ERR349583	Vietnam	1994	Wong et al 2016	4.3.1.1	6	CGCAGTCGTAGGGTCCCGCCGGGTT
10426_1_63	ERR349584	Vietnam	1995	Wong et al 2016	4.3.1.1	6	CGCAGTCGTAGGGTCCCGCCGGGTT
10426_1_64	ERR349585	Vietnam	1997	Wong et al 2016	4.3.1.1	6	CGCAGTCGTAGGGTCCCGCCGGGTT
10426_1_67	ERR349588	Vietnam	1994	Wong et al 2016	4.3.1.1	6	CGCAGTCGTAGGGTCCCGCCGGGTT
10426_1_69	ERR349590	Vietnam	1993	Wong et al 2016	4.3.1.1	6	CGCAGTCGTAGGGTCCCGCCGGGTT
10426_1_70	ERR349591	Vietnam	1994	Wong et al 2016	4.3.1.1	6	CGCAGTCGTAGGGTCCCGCCGGGTT
10426_1_71	ERR349592	Vietnam	1994	Wong et al 2016	4.3.1.1	6	CGCAGTCGTAGGGTCCCGCCGGGTT
10426_1_72	ERR349593	Vietnam	1994	Wong et al 2016	4.3.1.1	6	CGCAGTCGTAGGGTCCCGCCGGGTT
10426_1_74	ERR349595	Vietnam	1994	Wong et al 2016	4.3.1.1	6	CGCAGTCGTAGGGTCCCGCCGGGTT
10426_1_76	ERR349597	Vietnam	1994	Wong et al 2016	4.3.1.1	6	CGCAGTCGTAGGGTCCCGCCGGGTT
10426_1_78	ERR349599	Vietnam	1994	Wong et al 2016	4.3.1.1	6	CGCAGTCGTAGGGTCCCGCCGGGTT
10426_1_79	ERR349600	Vietnam	1994	Wong et al 2016	4.3.1.1	6	CGCAGTCGTAGGGTCCCGCCGGGTT
10426_1_80	ERR349601	Vietnam	1994	Wong et al 2016	4.3.1.1	6	CGCAGTCGTAGGGTCCCGCCGGGTT
10426_1_81	ERR349602	Vietnam	1994	Wong et al 2016	4.3.1.1	6	CGCAGTCGTAGGGTCCCGCCGGGTT
10426_1_82	ERR349603	Vietnam	1994	Wong et al 2016	4.3.1.1	6	CGCAGTCGTAGGGTCCCGCCGGGTT
10426_1_84	ERR349605	Vietnam	1994	Wong et al 2016	4.3.1.1	6	CGCAGTCGTAGGGTCCCGCCGGGTT
10426_1_88	ERR349609	Vietnam	1994	Wong et al 2016	4.3.1.1	6	CGCAGTCGTAGGGTCCCGCCGGGTT
10426_1_92	ERR349613	Vietnam	1994	Wong et al 2016	4.3.1.1	6	CGCAGTCGTAGGGTCCCGCCGGGTT
10426_1_94	ERR349615	Vietnam	1994	Wong et al 2016	4.3.1.1	6	CGCAGTCGTAGGGTCCCGCCGGGTT
10426_1_95	ERR349616	Vietnam	1994	Wong et al 2016	4.3.1.1	6	CGCAGTCGTAGGGTCCCGCCGGGTT
10492_1_15	ERR352268	Unknown	2012	Wong et al 2016	4.3.1.2	6	CGCAGTCGTAGGGTCCCGCCGGGTT
10492_1_79	ERR352332	Cambodia	2012	Wong et al 2016	4.3.1.1	6	CGCAGTCGTAGGGTCCCGCCGGGTT
10540_1_10	ERR352607	Vietnam	1995	Wong et al 2016	4.3.1.1	6	CGCAGTCGTAGGGTCCCGCCGGGTT
10540_1_11	ERR352608	Vietnam	1994	Wong et al 2016	4.3.1.1	6	CGCAGTCGTAGGGTCCCGCCGGGTT
10540_1_14	ERR352611	Vietnam	1994	Wong et al 2016	4.3.1.1	6	CGCAGTCGTAGGGTCCCGCCGGGTT
10540_1_15	ERR352612	Vietnam	1996	Wong et al 2016	4.3.1.1	6	CGCAGTCGTAGGGTCCCGCCGGGTT
10540_1_16	ERR352613	Vietnam	1996	Wong et al 2016	4.3.1.1	6	CGCAGTCGTAGGGTCCCGCCGGGTT
10540_1_18	ERR352615	Vietnam	1995	Wong et al 2016	4.3.1.1	6	CGCAGTCGTAGGGTCCCGCCGGGTT
10540_1_19	ERR352616	Vietnam	1996	Wong et al 2016	4.3.1.1	6	CGCAGTCGTAGGGTCCCGCCGGGTT
10540_1_20	ERR352617	Vietnam	1994	Wong et al 2016	4.3.1.1	6	CGCAGTCGTAGGGTCCCGCCGGGTT
10540_1_22	ERR352619	Vietnam	1996	Wong et al 2016	4.3.1.1	6	CGCAGTCGTAGGGTCCCGCCGGGTT
10540_1_24	ERR352621	Vietnam	1995	Wong et al 2016	4.3.1.1	6	CGCAGTCGTAGGGTCCCGCCGGGTT
10540_1_28	ERR352625	Vietnam	1995	Wong et al 2016	4.3.1.1	6	CGCAGTCGTAGGGTCCCGCCGGGTT
10540_1_35	ERR352632	Vietnam	1995	Wong et al 2016	4.3.1.1	6	CGCAGTCGTAGGGTCCCGCCGGGTT
10540_1_36	ERR352633	Vietnam	1995	Wong et al 2016	4.3.1.1	6	CGCAGTCGTAGGGTCCCGCCGGGTT
10540_1_38	ERR352635	Vietnam	1994	Wong et al 2016	4.3.1.1	6	CGCAGTCGTAGGGTCCCGCCGGGTT
10540_1_39	ERR352636	Vietnam	1995	Wong et al 2016	4.3.1.1	6	CGCAGTCGTAGGGTCCCGCCGGGTT
10540_1_43	ERR352640	Vietnam	1996	Wong et al 2016	4.3.1.1	6	CGCAGTCGTAGGGTCCCGCCGGGTT
10540_1_44	ERR352641	Vietnam	1994	Wong et al 2016	4.3.1.1	6	CGCAGTCGTAGGGTCCCGCCGGGTT
10540_1_45	ERR352642	Vietnam	1994	Wong et al 2016	4.3.1.1	6	CGCAGTCGTAGGGTCCCGCCGGGTT
10540_1_46	ERR352643	Vietnam	1997	Wong et al 2016	4.3.1.1	6	CGCAGTCGTAGGGTCCCGCCGGGTT
10540_1_47	ERR352644	Vietnam	1997	Wong et al 2016	4.3.1.1	6	CGCAGTCGTAGGGTCCCGCCGGGTT
10540_1_48	ERR352645	Vietnam	1994	Wong et al 2016	4.3.1.1	6	CGCAGTCGTAGGGTCCCGCCGGGTT
10540_1_49	ERR352646	Vietnam	1997	Wong et al 2016	4.3.1.1	6	CGCAGTCGTAGGGTCCCGCCGGGTT
10540_1_50	ERR352647	Vietnam	1997	Wong et al 2016	4.3.1.1	6	CGCAGTCGTAGGGTCCCGCCGGGTT
10540_1_51	ERR352648	Vietnam	1994	Wong et al 2016	4.3.1.1	6	CGCAGTCGTAGGGTCCCGCCGGGTT
10540_1_52	ERR352649	Vietnam	1997	Wong et al 2016	4.3.1.1	6	CGCAGTCGTAGGGTCCCGCCGGGTT
10540_1_54	ERR352651	Vietnam	1997	Wong et al 2016	4.3.1.1	6	CGCAGTCGTAGGGTCCCGCCGGGTT
10540_1_55	ERR352652	Vietnam	1997	Wong et al 2016	4.3.1.1	6	CGCAGTCGTAGGGTCCCGCCGGGTT
10540_1_57	ERR352654	Vietnam	1997	Wong et al 2016	4.3.1.1	6	CGCAGTCGTAGGGTCCCGCCGGGTT
10540_1_58	ERR352655	Vietnam	1995	Wong et al 2016	4.3.1.1	6	CGCAGTCGTAGGGTCCCGCCGGGTT
10540_1_59	ERR352656	Vietnam	1997	Wong et al 2016	4.3.1.1	6	CGCAGTCGTAGGGTCCCGCCGGGTT
10540_1_60	ERR352657	Vietnam	1998	Wong et al 2016	4.3.1.1	6	CGCAGTCGTAGGGTCCCGCCGGGTT
10540_1_62	ERR352659	Vietnam	1998	Wong et al 2016	4.3.1.1	6	CGCAGTCGTAGGGTCCCGCCGGGTT
10540_1_63	ERR352661	Vietnam	1997	Wong et al 2016	4.3.1.1	6	CGCAGTCGTAGGGTCCCGCCGGGTT
10540_1_64	ERR352662	Vietnam	1997	Wong et al 2016	4.3.1.1	6	CGCAGTCGTAGGGTCCCGCCGGGTT
10540_1_65	ERR352663	Vietnam	1998	Wong et al 2016	4.3.1.1	6	CGCAGTCGTAGGGTCCCGCCGGGTT
10540_1_66	ERR352665	Vietnam	1999	Wong et al 2016	4.3.1.1	6	CGCAGTCGTAGGGTCCCGCCGGGTT
10540_1_67	ERR352667	Vietnam	1997	Wong et al 2016	4.3.1.1	6	CGCAGTCGTAGGGTCCCGCCGGGTT
10540_1_68	ERR352669	Vietnam	1994	Wong et al 2016	4.3.1.1	6	CGCAGTCGTAGGGTCCCGCCGGGTT
10540_1_70	ERR352673	Vietnam	1997	Wong et al 2016	4.3.1.1	6	CGCAGTCGTAGGGTCCCGCCGGGTT
10540_1_72	ERR352677	Vietnam	1998	Wong et al 2016	4.3.1.1	6	CGCAGTCGTAGGGTCCCGCCGGGTT
10540_1_73	ERR352679	Vietnam	1997	Wong et al 2016	4.3.1.1	6	CGCAGTCGTAGGGTCCCGCCGGGTT
10540_1_78	ERR352689	Vietnam	1994	Wong et al 2016	4.3.1.1	6	CGCAGTCGTAGGGTCCCGCCGGGTT
10540_1_79	ERR352691	Vietnam	1995	Wong et al 2016	4.3.1.1	6	CGCAGTCGTAGGGTCCCGCCGGGTT
10540_1_8	ERR352605	Vietnam	1995	Wong et al 2016	4.3.1.1	6	CGCAGTCGTAGGGTCCCGCCGGGTT
10540_1_82	ERR352697	Vietnam	1995	Wong et al 2016	4.3.1.1	6	CGCAGTCGTAGGGTCCCGCCGGGTT
10540_1_85	ERR352703	Vietnam	1994	Wong et al 2016	4.3.1.1	6	CGCAGTCGTAGGGTCCCGCCGGGTT
10540_1_88	ERR352709	Vietnam	1994	Wong et al 2016	4.3.1.1	6	CGCAGTCGTAGGGTCCCGCCGGGTT
10540_1_9	ERR352606	Vietnam	1995	Wong et al 2016	4.3.1.1	6	CGCAGTCGTAGGGTCCCGCCGGGTT
10540_1_90	ERR352713	Vietnam	1994	Wong et al 2016	4.3.1.1	6	CGCAGTCGTAGGGTCCCGCCGGGTT
10540_1_92	ERR352717	Vietnam	1994	Wong et al 2016	4.3.1.1	6	CGCAGTCGTAGGGTCCCGCCGGGTT
10540_1_93	ERR352719	Vietnam	1994	Wong et al 2016	4.3.1.1	6	CGCAGTCGTAGGGTCCCGCCGGGTT
10540_1_94	ERR352721	Vietnam	1994	Wong et al 2016	4.3.1.1	6	CGCAGTCGTAGGGTCCCGCCGGGTT
10540_1_96	ERR352725	Vietnam	1994	Wong et al 2016	4.3.1.1	6	CGCAGTCGTAGGGTCCCGCCGGGTT
10561_2_43	ERR357618	Vietnam	1995	Wong et al 2016	4.3.1.1	6	CGCAGTCGTAGGGTCCCGCCGGGTT
10561_2_67	ERR357642	Vietnam	1994	Wong et al 2016	4.3.1.1	6	CGCAGTCGTAGGGTCCCGCCGGGTT
10561_2_69	ERR357644	Vietnam	1995	Wong et al 2016	4.3.1.1	6	CGCAGTCGTAGGGTCCCGCCGGGTT
10561_2_70	ERR357645	Vietnam	1994	Wong et al 2016	4.3.1.1	6	CGCAGTCGTAGGGTCCCGCCGGGTT
10561_2_72	ERR357647	Vietnam	1995	Wong et al 2016	4.3.1.1	6	CGCAGTCGTAGGGTCCCGCCGGGTT
10561_2_74	ERR357649	Vietnam	1994	Wong et al 2016	4.3.1.1	6	CGCAGTCGTAGGGTCCCGCCGGGTT
10561_2_76	ERR357651	Vietnam	1993	Wong et al 2016	4.3.1.1	6	CGCAGTCGTAGGGTCCCGCCGGGTT
10561_2_78	ERR357653	Vietnam	1997	Wong et al 2016	4.3.1.1	6	CGCAGTCGTAGGGTCCCGCCGGGTT
10561_2_79	ERR357654	Vietnam	1997	Wong et al 2016	4.3.1.1	6	CGCAGTCGTAGGGTCCCGCCGGGTT
10561_2_80	ERR357655	Vietnam	1994	Wong et al 2016	4.3.1.1	6	CGCAGTCGTAGGGTCCCGCCGGGTT
10561_2_82	ERR357657	Vietnam	1994	Wong et al 2016	4.3.1.1	6	CGCAGTCGTAGGGTCCCGCCGGGTT
10561_2_84	ERR357659	Vietnam	1993	Wong et al 2016	4.3.1.1	6	CGCAGTCGTAGGGTCCCGCCGGGTT
10561_2_86	ERR357661	Vietnam	1994	Wong et al 2016	4.3.1.1	6	CGCAGTCGTAGGGTCCCGCCGGGTT
10562_2_28	ERR357783	India	2010	Wong et al 2016	4.3.1.2	6	CGCAGTCGTAGGGTCCCGCCGGGTT
10562_2_78	ERR357833	Vietnam	2011	Wong et al 2016	4.3.1.1	6	CGCAGTCGTAGGGTCCCGCCGGGTT
10592_2_11	ERR360459	Pakistan	2003	Wong et al 2016	4.3.1	6	CGCAGTCGTAGGGTCCCGCCGGGTT
10592_2_20	ERR360468	Pakistan	2003	Wong et al 2016	4.3.1.1	6	CGCAGTCGTAGGGTCCCGCCGGGTT
10592_2_23	ERR360471	Pakistan	2003	Wong et al 2016	4.3.1	6	CGCAGTCGTAGGGTCCCGCCGGGTT
10592_2_26	ERR360474	Pakistan	2003	Wong et al 2016	4.3.1	6	CGCAGTCGTAGGGTCCCGCCGGGTT
10592_2_30	ERR360478	Pakistan	2003	Wong et al 2016	4.3.1	6	CGCAGTCGTAGGGTCCCGCCGGGTT
10592_2_9	ERR360457	Pakistan	2003	Wong et al 2016	4.3.1	6	CGCAGTCGTAGGGTCCCGCCGGGTT
10593_2_10	ERR360623	SriLanka	2002	Wong et al 2016	4.3.1.2	6	CGCAGTCGTAGGGTCCCGCCGGGTT
10607_1_42	ERR360738	Cambodia	2008	Wong et al 2016	4.3.1.1	6	CGCAGTCGTAGGGTCCCGCCGGGTT
10607_1_43	ERR360739	Cambodia	2008	Wong et al 2016	4.3.1.1	6	CGCAGTCGTAGGGTCCCGCCGGGTT
10607_1_44	ERR360740	Cambodia	2008	Wong et al 2016	4.3.1.1	6	CGCAGTCGTAGGGTCCCGCCGGGTT
10607_1_46	ERR360742	Cambodia	2008	Wong et al 2016	4.3.1.1	6	CGCAGTCGTAGGGTCCCGCCGGGTT
10607_1_47	ERR360743	Cambodia	2008	Wong et al 2016	4.3.1.1	6	CGCAGTCGTAGGGTCCCGCCGGGTT
10607_1_48	ERR360744	Cambodia	2009	Wong et al 2016	4.3.1.1	6	CGCAGTCGTAGGGTCCCGCCGGGTT
10607_1_49	ERR360745	Cambodia	2009	Wong et al 2016	4.3.1.1	6	CGCAGTCGTAGGGTCCCGCCGGGTT
10607_1_50	ERR360746	Cambodia	2009	Wong et al 2016	4.3.1.1	6	CGCAGTCGTAGGGTCCCGCCGGGTT
10607_1_52	ERR360748	Cambodia	2010	Wong et al 2016	4.3.1.1	6	CGCAGTCGTAGGGTCCCGCCGGGTT
10607_1_58	ERR360754	Cambodia	2010	Wong et al 2016	4.3.1.1	6	CGCAGTCGTAGGGTCCCGCCGGGTT
10607_1_59	ERR360755	Cambodia	2011	Wong et al 2016	4.3.1.1	6	CGCAGTCGTAGGGTCCCGCCGGGTT
10607_1_60	ERR360756	Cambodia	2011	Wong et al 2016	4.3.1.1	6	CGCAGTCGTAGGGTCCCGCCGGGTT
10607_1_62	ERR360758	Cambodia	2011	Wong et al 2016	4.3.1.1	6	CGCAGTCGTAGGGTCCCGCCGGGTT
10607_1_63	ERR360759	Cambodia	2011	Wong et al 2016	4.3.1.1	6	CGCAGTCGTAGGGTCCCGCCGGGTT
10607_1_64	ERR360760	Cambodia	2011	Wong et al 2016	4.3.1.1	6	CGCAGTCGTAGGGTCCCGCCGGGTT
10607_1_65	ERR360761	Cambodia	2011	Wong et al 2016	4.3.1.1	6	CGCAGTCGTAGGGTCCCGCCGGGTT
10607_1_67	ERR360763	Cambodia	2011	Wong et al 2016	4.3.1.1	6	CGCAGTCGTAGGGTCCCGCCGGGTT
10607_1_69	ERR360765	Cambodia	2011	Wong et al 2016	4.3.1.1	6	CGCAGTCGTAGGGTCCCGCCGGGTT
10607_1_70	ERR360766	Cambodia	2011	Wong et al 2016	4.3.1.1	6	CGCAGTCGTAGGGTCCCGCCGGGTT
10607_1_73	ERR360769	Cambodia	2011	Wong et al 2016	4.3.1.1	6	CGCAGTCGTAGGGTCCCGCCGGGTT
10607_1_74	ERR360770	Cambodia	2011	Wong et al 2016	4.3.1.1	6	CGCAGTCGTAGGGTCCCGCCGGGTT
10607_1_76	ERR360772	Cambodia	2011	Wong et al 2016	4.3.1.1	6	CGCAGTCGTAGGGTCCCGCCGGGTT
10607_1_77	ERR360773	Cambodia	2011	Wong et al 2016	4.3.1.1	6	CGCAGTCGTAGGGTCCCGCCGGGTT
10607_1_78	ERR360774	Cambodia	2011	Wong et al 2016	4.3.1.1	6	CGCAGTCGTAGGGTCCCGCCGGGTT
10607_1_79	ERR360775	Cambodia	2012	Wong et al 2016	4.3.1.1	6	CGCAGTCGTAGGGTCCCGCCGGGTT
10607_1_80	ERR360776	Cambodia	2012	Wong et al 2016	4.3.1.1	6	CGCAGTCGTAGGGTCCCGCCGGGTT
10607_1_81	ERR360777	Cambodia	2012	Wong et al 2016	4.3.1.1	6	CGCAGTCGTAGGGTCCCGCCGGGTT
10607_1_82	ERR360778	Cambodia	2012	Wong et al 2016	4.3.1.1	6	CGCAGTCGTAGGGTCCCGCCGGGTT
10607_1_83	ERR360779	Cambodia	2012	Wong et al 2016	4.3.1.1	6	CGCAGTCGTAGGGTCCCGCCGGGTT
10607_1_84	ERR360780	Cambodia	2012	Wong et al 2016	4.3.1.1	6	CGCAGTCGTAGGGTCCCGCCGGGTT
10607_1_85	ERR360781	Cambodia	2012	Wong et al 2016	4.3.1.1	6	CGCAGTCGTAGGGTCCCGCCGGGTT
10607_1_86	ERR360782	Cambodia	2012	Wong et al 2016	4.3.1.1	6	CGCAGTCGTAGGGTCCCGCCGGGTT
10607_1_87	ERR360783	Cambodia	2012	Wong et al 2016	4.3.1.1	6	CGCAGTCGTAGGGTCCCGCCGGGTT
10607_1_89	ERR360785	Cambodia	2012	Wong et al 2016	4.3.1.1	6	CGCAGTCGTAGGGTCCCGCCGGGTT
10607_1_90	ERR360786	Cambodia	2012	Wong et al 2016	4.3.1.1	6	CGCAGTCGTAGGGTCCCGCCGGGTT
10607_1_91	ERR360787	Cambodia	2012	Wong et al 2016	4.3.1.1	6	CGCAGTCGTAGGGTCCCGCCGGGTT
10607_1_92	ERR360788	Cambodia	2012	Wong et al 2016	4.3.1.1	6	CGCAGTCGTAGGGTCCCGCCGGGTT
10607_1_93	ERR360789	Cambodia	2012	Wong et al 2016	4.3.1.1	6	CGCAGTCGTAGGGTCCCGCCGGGTT
10607_2_54	ERR360846	Cambodia	2010	Wong et al 2016	4.3.1.1	6	CGCAGTCGTAGGGTCCCGCCGGGTT
10607_2_55	ERR360847	Cambodia	2010	Wong et al 2016	4.3.1.1	6	CGCAGTCGTAGGGTCCCGCCGGGTT
10607_2_56	ERR360848	Cambodia	2010	Wong et al 2016	4.3.1.1	6	CGCAGTCGTAGGGTCCCGCCGGGTT
10608_1_1	ERR360889	Cambodia	2008	Wong et al 2016	4.3.1.1	6	CGCAGTCGTAGGGTCCCGCCGGGTT
10608_1_3	ERR360891	Cambodia	2008	Wong et al 2016	4.3.1.1	6	CGCAGTCGTAGGGTCCCGCCGGGTT
10608_2_11	ERR360954	Cambodia	2010	Wong et al 2016	4.3.1.1	6	CGCAGTCGTAGGGTCCCGCCGGGTT
10608_2_12	ERR360955	Cambodia	2010	Wong et al 2016	4.3.1.1	6	CGCAGTCGTAGGGTCCCGCCGGGTT
10608_2_13	ERR360956	Cambodia	2010	Wong et al 2016	4.3.1.1	6	CGCAGTCGTAGGGTCCCGCCGGGTT
10608_2_15	ERR360958	Cambodia	2010	Wong et al 2016	4.3.1.1	6	CGCAGTCGTAGGGTCCCGCCGGGTT
10608_2_16	ERR360959	Cambodia	2010	Wong et al 2016	4.3.1.1	6	CGCAGTCGTAGGGTCCCGCCGGGTT
10608_2_17	ERR360960	Cambodia	2010	Wong et al 2016	4.3.1.1	6	CGCAGTCGTAGGGTCCCGCCGGGTT
10608_2_18	ERR360961	Cambodia	2011	Wong et al 2016	4.3.1.1	6	CGCAGTCGTAGGGTCCCGCCGGGTT
10608_2_19	ERR360962	Cambodia	2011	Wong et al 2016	4.3.1.1	6	CGCAGTCGTAGGGTCCCGCCGGGTT
10608_2_21	ERR360963	Cambodia	2012	Wong et al 2016	4.3.1.1	6	CGCAGTCGTAGGGTCCCGCCGGGTT
10608_2_22	ERR360964	Cambodia	2012	Wong et al 2016	4.3.1.1	6	CGCAGTCGTAGGGTCCCGCCGGGTT
10608_2_23	ERR360965	Cambodia	2012	Wong et al 2016	4.3.1.1	6	CGCAGTCGTAGGGTCCCGCCGGGTT
10608_2_24	ERR360966	Cambodia	2012	Wong et al 2016	4.3.1.1	6	CGCAGTCGTAGGGTCCCGCCGGGTT
10608_2_25	ERR360967	Cambodia	2012	Wong et al 2016	4.3.1.1	6	CGCAGTCGTAGGGTCCCGCCGGGTT
10608_2_26	ERR360968	Cambodia	2012	Wong et al 2016	4.3.1.1	6	CGCAGTCGTAGGGTCCCGCCGGGTT
10608_2_28	ERR360970	Cambodia	2012	Wong et al 2016	4.3.1.1	6	CGCAGTCGTAGGGTCCCGCCGGGTT
10608_2_30	ERR360971	Cambodia	2012	Wong et al 2016	4.3.1.1	6	CGCAGTCGTAGGGTCCCGCCGGGTT
10608_2_31	ERR360972	Cambodia	2012	Wong et al 2016	4.3.1.1	6	CGCAGTCGTAGGGTCCCGCCGGGTT
10608_2_32	ERR360973	Cambodia	2012	Wong et al 2016	4.3.1.1	6	CGCAGTCGTAGGGTCCCGCCGGGTT
10608_2_34	ERR360975	Cambodia	2012	Wong et al 2016	4.3.1.1	6	CGCAGTCGTAGGGTCCCGCCGGGTT
10608_2_35	ERR360976	Cambodia	2012	Wong et al 2016	4.3.1.1	6	CGCAGTCGTAGGGTCCCGCCGGGTT
10608_2_36	ERR360977	Cambodia	2012	Wong et al 2016	4.3.1.1	6	CGCAGTCGTAGGGTCCCGCCGGGTT
10608_2_37	ERR360978	Cambodia	2012	Wong et al 2016	4.3.1.1	6	CGCAGTCGTAGGGTCCCGCCGGGTT
10608_2_39	ERR360979	Cambodia	2012	Wong et al 2016	4.3.1.1	6	CGCAGTCGTAGGGTCCCGCCGGGTT
10608_2_4	ERR360948	Cambodia	2008	Wong et al 2016	4.3.1.1	6	CGCAGTCGTAGGGTCCCGCCGGGTT
10608_2_42	ERR360980	Cambodia	2012	Wong et al 2016	4.3.1.1	6	CGCAGTCGTAGGGTCCCGCCGGGTT
10608_2_43	ERR360981	Cambodia	2012	Wong et al 2016	4.3.1.1	6	CGCAGTCGTAGGGTCCCGCCGGGTT
10608_2_44	ERR360982	Cambodia	2012	Wong et al 2016	4.3.1.1	6	CGCAGTCGTAGGGTCCCGCCGGGTT
10608_2_45	ERR360983	Cambodia	2012	Wong et al 2016	4.3.1.1	6	CGCAGTCGTAGGGTCCCGCCGGGTT
10608_2_48	ERR360984	Cambodia	2012	Wong et al 2016	4.3.1.1	6	CGCAGTCGTAGGGTCCCGCCGGGTT
10608_2_5	ERR360949	Cambodia	2008	Wong et al 2016	4.3.1.1	6	CGCAGTCGTAGGGTCCCGCCGGGTT
10608_2_50	ERR360986	Cambodia	2012	Wong et al 2016	4.3.1.1	6	CGCAGTCGTAGGGTCCCGCCGGGTT
10608_2_52	ERR360988	Cambodia	2012	Wong et al 2016	4.3.1.1	6	CGCAGTCGTAGGGTCCCGCCGGGTT
10608_2_57	ERR360990	Cambodia	2012	Wong et al 2016	4.3.1.1	6	CGCAGTCGTAGGGTCCCGCCGGGTT
10608_2_58	ERR360991	Cambodia	2012	Wong et al 2016	4.3.1.1	6	CGCAGTCGTAGGGTCCCGCCGGGTT
10608_2_59	ERR360992	Cambodia	2012	Wong et al 2016	4.3.1.1	6	CGCAGTCGTAGGGTCCCGCCGGGTT
10608_2_60	ERR360993	Cambodia	2012	Wong et al 2016	4.3.1.1	6	CGCAGTCGTAGGGTCCCGCCGGGTT
10608_2_61	ERR360994	Cambodia	2012	Wong et al 2016	4.3.1.1	6	CGCAGTCGTAGGGTCCCGCCGGGTT
10608_2_63	ERR360996	Cambodia	2012	Wong et al 2016	4.3.1.1	6	CGCAGTCGTAGGGTCCCGCCGGGTT
10608_2_65	ERR360997	Cambodia	2012	Wong et al 2016	4.3.1.1	6	CGCAGTCGTAGGGTCCCGCCGGGTT
10608_2_66	ERR360998	Cambodia	2012	Wong et al 2016	4.3.1.1	6	CGCAGTCGTAGGGTCCCGCCGGGTT
10608_2_68	ERR361000	Cambodia	2012	Wong et al 2016	4.3.1.1	6	CGCAGTCGTAGGGTCCCGCCGGGTT
10608_2_7	ERR360950	Cambodia	2008	Wong et al 2016	4.3.1.1	6	CGCAGTCGTAGGGTCCCGCCGGGTT
10608_2_9	ERR360952	Cambodia	2010	Wong et al 2016	4.3.1.1	6	CGCAGTCGTAGGGTCCCGCCGGGTT
11642_2_13	ERR422762	India	2010	Wong et al 2016	4.3.1.2	6	CGCAGTCGTAGGGTCCCGCCGGGTT
11642_2_15	ERR422764	Unknown	2010	Wong et al 2016	4.3.1.3	6	CGCAGTCGTAGGGTCCCGCCGGGTT
11642_2_16	ERR422765	India	2010	Wong et al 2016	4.3.1.2	6	CGCAGTCGTAGGGTCCCGCCGGGTT
11642_2_69	ERR422816	Unknown	2011	Wong et al 2016	4.3.1	6	CGCAGTCGTAGGGTCCCGCCGGGTT
11642_2_7	ERR422757	Unknown	2009	Wong et al 2016	4.3.1	6	CGCAGTCGTAGGGTCCCGCCGGGTT
11800_1_9	ERR1017040	Unknown	2005	Wong et al 2016	4.3.1	6	CGCAGTCGTAGGGTCCCGCCGGGTT
12045_3_70	ERR485127	Unknown	2005	Wong et al 2016	4.3.1	6	CGCAGTCGTAGGGTCCCGCCGGGTT
12045_3_75	ERR485132	Unknown	2006	Wong et al 2016	4.3.1.3	6	CGCAGTCGTAGGGTCCCGCCGGGTT
12045_3_76	ERR485133	Unknown	2006	Wong et al 2016	4.3.1.3	6	CGCAGTCGTAGGGTCCCGCCGGGTT
16404_4_39	ERR984741	Kenya	2013	Park et al 2018	4.3.1.2.EA2	6	CGCAGTCGTAGGGTCCCGCCGGGTT
16404_5_69	ERR984860	Kenya	2013	Park et al 2018	4.3.1.2.EA2	6	CGCAGTCGTAGGGTCCCGCCGGGTT
16549_7_5	ERR1010004	Kenya	2013	Park et al 2018	4.3.1.2.EA2	6	CGCAGTCGTAGGGTCCCGCCGGGTT
22204_7_111	ERR3332545	Kenya	2015	This study	4.3.1.2.EA2	6	CGCAGTCGTAGGGTCCCGCCGGGTT
22204_7_115	ERR3332546	Kenya	2015	This study	4.3.1.2.EA2	6	CGCAGTCGTAGGGTCCCGCCGGGTT
22204_7_146	ERR3332556	Kenya	2013	This study	4.3.1.2.EA2	6	CGCAGTCGTAGGGTCCCGCCGGGTT
22204_7_209	ERR2525483	Kenya	2015	This study	4.3.1.2.EA2	6	CGCAGTCGTAGGGTCCCGCCGGGTT
22204_7_210	ERR2525484	Kenya	2015	This study	4.3.1.2.EA2	6	CGCAGTCGTAGGGTCCCGCCGGGTT
22204_7_232	ERR3332584	Kenya	2015	This study	4.3.1.2.EA2	6	CGCAGTCGTAGGGTCCCGCCGGGTT
22204_7_236	ERR2525501	Kenya	2015	This study	4.3.1.2.EA2	6	CGCAGTCGTAGGGTCCCGCCGGGTT
22204_7_237	ERR3332585	Kenya	2015	This study	4.3.1.2.EA2	6	CGCAGTCGTAGGGTCCCGCCGGGTT
22204_7_239	ERR3332586	Kenya	2015	This study	4.3.1.2.EA2	6	CGCAGTCGTAGGGTCCCGCCGGGTT
22204_7_256	ERR3332589	Kenya	2015	This study	4.3.1.2.EA2	6	CGCAGTCGTAGGGTCCCGCCGGGTT
22306_3_108	ERR3332669	Kenya	2015	This study	4.3.1.2.EA2	6	CGCAGTCGTAGGGTCCCGCCGGGTT
22306_3_138	ERR3332690	Kenya	2015	This study	4.3.1.2.EA2	6	CGCAGTCGTAGGGTCCCGCCGGGTT
22306_3_140	ERR3332691	Kenya	2015	This study	4.3.1.2.EA2	6	CGCAGTCGTAGGGTCCCGCCGGGTT
22306_3_164	ERR3332709	Kenya	2015	This study	4.3.1.2.EA2	6	CGCAGTCGTAGGGTCCCGCCGGGTT
22306_3_177	ERR3332719	Kenya	2013	This study	4.3.1.2.EA2	6	CGCAGTCGTAGGGTCCCGCCGGGTT
22306_3_185	ERR3332727	Kenya	2014	This study	4.3.1.2.EA2	6	CGCAGTCGTAGGGTCCCGCCGGGTT
22306_3_191	ERR3332731	Kenya	2013	This study	4.3.1.2.EA2	6	CGCAGTCGTAGGGTCCCGCCGGGTT
22306_3_228	ERR3332758	Kenya	2014	This study	4.3.1.2.EA2	6	CGCAGTCGTAGGGTCCCGCCGGGTT
22306_3_67	ERR3332642	Kenya	2014	This study	4.3.1.2.EA2	6	CGCAGTCGTAGGGTCCCGCCGGGTT
22306_3_85	ERR3332652	Kenya	2014	This study	4.3.1.2.EA2	6	CGCAGTCGTAGGGTCCCGCCGGGTT
22306_3_96	ERR3332662	Kenya	2014	This study	4.3.1.2.EA2	6	CGCAGTCGTAGGGTCCCGCCGGGTT
24276_3_115	ERR2909476	Kenya	2015	This study	4.3.1.2.EA2	6	CGCAGTCGTAGGGTCCCGCCGGGTT
24276_3_129	ERR2909490	Kenya	2016	This study	4.3.1.2.EA2	6	CGCAGTCGTAGGGTCCCGCCGGGTT
24276_3_143	ERR3332776	Kenya	2016	This study	4.3.1.2.EA2	6	CGCAGTCGTAGGGTCCCGCCGGGTT
24276_3_153	ERR2909506	Kenya	2015	This study	4.3.1.2.EA2	6	CGCAGTCGTAGGGTCCCGCCGGGTT
24276_3_157	ERR2909509	Kenya	2015	This study	4.3.1.2.EA2	6	CGCAGTCGTAGGGTCCCGCCGGGTT
24276_3_159	ERR2909511	Kenya	2015	This study	4.3.1.2.EA2	6	CGCAGTCGTAGGGTCCCGCCGGGTT
24276_3_161	ERR2909513	Kenya	2015	This study	4.3.1.2.EA2	6	CGCAGTCGTAGGGTCCCGCCGGGTT
24276_3_162	ERR2909514	Kenya	2015	This study	4.3.1.2.EA2	6	CGCAGTCGTAGGGTCCCGCCGGGTT
24276_3_164	ERR2909516	Kenya	2014	This study	4.3.1.2.EA2	6	CGCAGTCGTAGGGTCCCGCCGGGTT
24276_3_167	ERR2909519	Kenya	2015	This study	4.3.1.2.EA2	6	CGCAGTCGTAGGGTCCCGCCGGGTT
24276_3_171	ERR2909523	Kenya	2015	This study	4.3.1.2.EA2	6	CGCAGTCGTAGGGTCCCGCCGGGTT
24276_3_177	ERR2909529	Kenya	2016	This study	4.3.1.2.EA2	6	CGCAGTCGTAGGGTCCCGCCGGGTT
24276_3_184	ERR2909536	Kenya	2016	This study	4.3.1.2.EA2	6	CGCAGTCGTAGGGTCCCGCCGGGTT
24276_3_185	ERR2909537	Kenya	2016	This study	4.3.1.2.EA2	6	CGCAGTCGTAGGGTCCCGCCGGGTT
24276_3_193	ERR2909539	Kenya	2014	This study	4.3.1.2.EA2	6	CGCAGTCGTAGGGTCCCGCCGGGTT
24276_3_214	ERR2909557	Kenya	2013	This study	4.3.1.1.EA1	6	CGCAGTCGTAGGGTCCCGCCGGGTT
24276_3_244	ERR2909580	Kenya	2014	This study	4.3.1.2.EA2	6	CGCAGTCGTAGGGTCCCGCCGGGTT
24276_3_247	ERR2909583	Kenya	2013	This study	4.3.1.2.EA2	6	CGCAGTCGTAGGGTCCCGCCGGGTT
24276_3_248	ERR2909584	Kenya	2013	This study	4.3.1.2.EA2	6	CGCAGTCGTAGGGTCCCGCCGGGTT
24276_3_249	ERR2909585	Kenya	2013	This study	4.3.1.2.EA2	6	CGCAGTCGTAGGGTCCCGCCGGGTT
24276_3_278	ERR2909612	Kenya	2013	This study	4.3.1.2.EA2	6	CGCAGTCGTAGGGTCCCGCCGGGTT
7468_7_55	ERR108654	Tanzania	2009	Wong et al 2016	4.3.1.2	6	CGCAGTCGTAGGGTCCCGCCGGGTT
7468_7_86	ERR108685	Tanzania	2010	Wong et al 2016	4.3.1.2	6	CGCAGTCGTAGGGTCCCGCCGGGTT
7468_7_87	ERR108686	Tanzania	2010	Wong et al 2016	4.3.1.2	6	CGCAGTCGTAGGGTCCCGCCGGGTT
8525_3_31	ERR212637	Kenya	2008	Wong et al 2016	4.3.1.2.EA2	6	CGCAGTCGTAGGGTCCCGCCGGGTT
8525_3_71	ERR212677	Kenya	2001	Wong et al 2016	4.3.1.2.EA2	6	CGCAGTCGTAGGGTCCCGCCGGGTT
8615_4_29	ERR217406	Kenya	2004	Wong et al 2016	4.3.1.1.EA1	6	CGCAGTCGTAGGGTCCCGCCGGGTT
8616_4_38	ERR420414	India	2009	Wong et al 2016	4.3.1.2	6	CGCAGTCGTAGGGTCCCGCCGGGTT
9475_4_50	ERR279346	India	2005	Wong et al 2016	4.3.1.2	6	CGCAGTCGTAGGGTCCCGCCGGGTT
9870_8_1	ERR319402	Cambodia	2008	Wong et al 2016	4.3.1.1	6	CGCAGTCGTAGGGTCCCGCCGGGTT
9870_8_11	ERR319412	Cambodia	2009	Wong et al 2016	4.3.1.1	6	CGCAGTCGTAGGGTCCCGCCGGGTT
9870_8_12	ERR319413	Cambodia	2009	Wong et al 2016	4.3.1.1	6	CGCAGTCGTAGGGTCCCGCCGGGTT
9870_8_13	ERR319414	Cambodia	2009	Wong et al 2016	4.3.1.1	6	CGCAGTCGTAGGGTCCCGCCGGGTT
9870_8_16	ERR319417	Cambodia	2009	Wong et al 2016	4.3.1.1	6	CGCAGTCGTAGGGTCCCGCCGGGTT
9870_8_18	ERR319419	Cambodia	2009	Wong et al 2016	4.3.1.1	6	CGCAGTCGTAGGGTCCCGCCGGGTT
9870_8_2	ERR319403	Cambodia	2008	Wong et al 2016	4.3.1.1	6	CGCAGTCGTAGGGTCCCGCCGGGTT
9870_8_20	ERR319421	Cambodia	2009	Wong et al 2016	4.3.1.1	6	CGCAGTCGTAGGGTCCCGCCGGGTT
9870_8_21	ERR319422	Cambodia	2010	Wong et al 2016	4.3.1.1	6	CGCAGTCGTAGGGTCCCGCCGGGTT
9870_8_23	ERR319424	Cambodia	2010	Wong et al 2016	4.3.1.1	6	CGCAGTCGTAGGGTCCCGCCGGGTT
9870_8_24	ERR319425	Cambodia	2010	Wong et al 2016	4.3.1.1	6	CGCAGTCGTAGGGTCCCGCCGGGTT
9870_8_25	ERR319426	Cambodia	2010	Wong et al 2016	4.3.1.1	6	CGCAGTCGTAGGGTCCCGCCGGGTT
9870_8_26	ERR319427	Cambodia	2010	Wong et al 2016	4.3.1.1	6	CGCAGTCGTAGGGTCCCGCCGGGTT
9870_8_27	ERR319428	Cambodia	2010	Wong et al 2016	4.3.1.1	6	CGCAGTCGTAGGGTCCCGCCGGGTT
9870_8_28	ERR319429	Cambodia	2010	Wong et al 2016	4.3.1.1	6	CGCAGTCGTAGGGTCCCGCCGGGTT
9870_8_3	ERR319404	Cambodia	2008	Wong et al 2016	4.3.1.1	6	CGCAGTCGTAGGGTCCCGCCGGGTT
9870_8_32	ERR319433	Cambodia	2010	Wong et al 2016	4.3.1.1	6	CGCAGTCGTAGGGTCCCGCCGGGTT
9870_8_33	ERR319434	Cambodia	2010	Wong et al 2016	4.3.1.1	6	CGCAGTCGTAGGGTCCCGCCGGGTT
9870_8_34	ERR319435	Cambodia	2010	Wong et al 2016	4.3.1.1	6	CGCAGTCGTAGGGTCCCGCCGGGTT
9870_8_35	ERR319436	Cambodia	2010	Wong et al 2016	4.3.1.1	6	CGCAGTCGTAGGGTCCCGCCGGGTT
9870_8_36	ERR319437	Cambodia	2010	Wong et al 2016	4.3.1.1	6	CGCAGTCGTAGGGTCCCGCCGGGTT
9870_8_38	ERR319439	Cambodia	2010	Wong et al 2016	4.3.1.1	6	CGCAGTCGTAGGGTCCCGCCGGGTT
9870_8_39	ERR319440	Cambodia	2010	Wong et al 2016	4.3.1.1	6	CGCAGTCGTAGGGTCCCGCCGGGTT
9870_8_4	ERR319405	Cambodia	2008	Wong et al 2016	4.3.1.1	6	CGCAGTCGTAGGGTCCCGCCGGGTT
9870_8_40	ERR319441	Cambodia	2010	Wong et al 2016	4.3.1.1	6	CGCAGTCGTAGGGTCCCGCCGGGTT
9870_8_41	ERR319442	Cambodia	2011	Wong et al 2016	4.3.1.1	6	CGCAGTCGTAGGGTCCCGCCGGGTT
9870_8_42	ERR319443	Cambodia	2011	Wong et al 2016	4.3.1.1	6	CGCAGTCGTAGGGTCCCGCCGGGTT
9870_8_43	ERR319444	Cambodia	2011	Wong et al 2016	4.3.1.1	6	CGCAGTCGTAGGGTCCCGCCGGGTT
9870_8_44	ERR319445	Cambodia	2011	Wong et al 2016	4.3.1.1	6	CGCAGTCGTAGGGTCCCGCCGGGTT
9870_8_45	ERR319446	Cambodia	2011	Wong et al 2016	4.3.1.1	6	CGCAGTCGTAGGGTCCCGCCGGGTT
9870_8_46	ERR319447	Cambodia	2011	Wong et al 2016	4.3.1.1	6	CGCAGTCGTAGGGTCCCGCCGGGTT
9870_8_47	ERR319448	Cambodia	2011	Wong et al 2016	4.3.1.1	6	CGCAGTCGTAGGGTCCCGCCGGGTT
9870_8_48	ERR319449	Cambodia	2011	Wong et al 2016	4.3.1.1	6	CGCAGTCGTAGGGTCCCGCCGGGTT
9870_8_49	ERR319450	Cambodia	2011	Wong et al 2016	4.3.1.1	6	CGCAGTCGTAGGGTCCCGCCGGGTT
9870_8_50	ERR319451	Cambodia	2011	Wong et al 2016	4.3.1.1	6	CGCAGTCGTAGGGTCCCGCCGGGTT
9870_8_51	ERR319452	Cambodia	2011	Wong et al 2016	4.3.1.1	6	CGCAGTCGTAGGGTCCCGCCGGGTT
9870_8_52	ERR319453	Cambodia	2011	Wong et al 2016	4.3.1.1	6	CGCAGTCGTAGGGTCCCGCCGGGTT
9870_8_53	ERR319454	Cambodia	2011	Wong et al 2016	4.3.1.1	6	CGCAGTCGTAGGGTCCCGCCGGGTT
9870_8_54	ERR319455	Cambodia	2011	Wong et al 2016	4.3.1.1	6	CGCAGTCGTAGGGTCCCGCCGGGTT
9870_8_55	ERR319456	Cambodia	2011	Wong et al 2016	4.3.1.1	6	CGCAGTCGTAGGGTCCCGCCGGGTT
9870_8_56	ERR319457	Cambodia	2011	Wong et al 2016	4.3.1.1	6	CGCAGTCGTAGGGTCCCGCCGGGTT
9870_8_57	ERR319458	Cambodia	2011	Wong et al 2016	4.3.1.1	6	CGCAGTCGTAGGGTCCCGCCGGGTT
9870_8_59	ERR319460	Cambodia	2011	Wong et al 2016	4.3.1.1	6	CGCAGTCGTAGGGTCCCGCCGGGTT
9870_8_60	ERR319461	Cambodia	2011	Wong et al 2016	4.3.1.1	6	CGCAGTCGTAGGGTCCCGCCGGGTT
9870_8_62	ERR319463	Cambodia	2011	Wong et al 2016	4.3.1.1	6	CGCAGTCGTAGGGTCCCGCCGGGTT
9870_8_64	ERR319465	Cambodia	2011	Wong et al 2016	4.3.1.1	6	CGCAGTCGTAGGGTCCCGCCGGGTT
9870_8_65	ERR319466	Cambodia	2011	Wong et al 2016	4.3.1.1	6	CGCAGTCGTAGGGTCCCGCCGGGTT
9870_8_66	ERR319467	Cambodia	2011	Wong et al 2016	4.3.1.1	6	CGCAGTCGTAGGGTCCCGCCGGGTT
9870_8_67	ERR319468	Cambodia	2011	Wong et al 2016	4.3.1.1	6	CGCAGTCGTAGGGTCCCGCCGGGTT
9870_8_68	ERR319469	Cambodia	2011	Wong et al 2016	4.3.1.1	6	CGCAGTCGTAGGGTCCCGCCGGGTT
9870_8_69	ERR319470	Cambodia	2011	Wong et al 2016	4.3.1.1	6	CGCAGTCGTAGGGTCCCGCCGGGTT
9870_8_7	ERR319408	Cambodia	2008	Wong et al 2016	4.3.1.1	6	CGCAGTCGTAGGGTCCCGCCGGGTT
9870_8_70	ERR319471	Cambodia	2011	Wong et al 2016	4.3.1.1	6	CGCAGTCGTAGGGTCCCGCCGGGTT
9870_8_71	ERR319472	Cambodia	2012	Wong et al 2016	4.3.1.1	6	CGCAGTCGTAGGGTCCCGCCGGGTT
9870_8_72	ERR319473	Cambodia	2012	Wong et al 2016	4.3.1.1	6	CGCAGTCGTAGGGTCCCGCCGGGTT
9870_8_73	ERR319474	Cambodia	2012	Wong et al 2016	4.3.1.1	6	CGCAGTCGTAGGGTCCCGCCGGGTT
9870_8_74	ERR319475	Cambodia	2012	Wong et al 2016	4.3.1.1	6	CGCAGTCGTAGGGTCCCGCCGGGTT
9870_8_75	ERR319476	Cambodia	2012	Wong et al 2016	4.3.1.1	6	CGCAGTCGTAGGGTCCCGCCGGGTT
9870_8_76	ERR319477	Cambodia	2012	Wong et al 2016	4.3.1.1	6	CGCAGTCGTAGGGTCCCGCCGGGTT
9870_8_77	ERR319478	Cambodia	2012	Wong et al 2016	4.3.1.1	6	CGCAGTCGTAGGGTCCCGCCGGGTT
9870_8_78	ERR319479	Cambodia	2012	Wong et al 2016	4.3.1.1	6	CGCAGTCGTAGGGTCCCGCCGGGTT
9870_8_79	ERR319480	Cambodia	2012	Wong et al 2016	4.3.1.1	6	CGCAGTCGTAGGGTCCCGCCGGGTT
9870_8_8	ERR319409	Cambodia	2008	Wong et al 2016	4.3.1.1	6	CGCAGTCGTAGGGTCCCGCCGGGTT
9870_8_80	ERR319481	Cambodia	2012	Wong et al 2016	4.3.1.1	6	CGCAGTCGTAGGGTCCCGCCGGGTT
9870_8_81	ERR319482	Cambodia	2012	Wong et al 2016	4.3.1.1	6	CGCAGTCGTAGGGTCCCGCCGGGTT
9870_8_82	ERR319483	Cambodia	2012	Wong et al 2016	4.3.1.1	6	CGCAGTCGTAGGGTCCCGCCGGGTT
9870_8_83	ERR319484	Cambodia	2012	Wong et al 2016	4.3.1.1	6	CGCAGTCGTAGGGTCCCGCCGGGTT
9870_8_84	ERR319485	Cambodia	2012	Wong et al 2016	4.3.1.1	6	CGCAGTCGTAGGGTCCCGCCGGGTT
9870_8_85	ERR319486	Cambodia	2012	Wong et al 2016	4.3.1.1	6	CGCAGTCGTAGGGTCCCGCCGGGTT
9870_8_86	ERR319487	Cambodia	2012	Wong et al 2016	4.3.1.1	6	CGCAGTCGTAGGGTCCCGCCGGGTT
9870_8_88	ERR319489	Cambodia	2012	Wong et al 2016	4.3.1.1	6	CGCAGTCGTAGGGTCCCGCCGGGTT
9870_8_89	ERR319490	Cambodia	2012	Wong et al 2016	4.3.1.1	6	CGCAGTCGTAGGGTCCCGCCGGGTT
9870_8_91	ERR319492	Cambodia	2012	Wong et al 2016	4.3.1.1	6	CGCAGTCGTAGGGTCCCGCCGGGTT
9870_8_93	ERR319494	Cambodia	2012	Wong et al 2016	4.3.1.1	6	CGCAGTCGTAGGGTCCCGCCGGGTT
9870_8_94	ERR319495	Cambodia	2012	Wong et al 2016	4.3.1.1	6	CGCAGTCGTAGGGTCCCGCCGGGTT
ERR119822	ERR119822	Nepal	2009	Thanh et al 2016	4.3.1.1	6	CGCAGTCGTAGGGTCCCGCCGGGTT
ERR119819	ERR119819	Nepal	2009	Thanh et al 2016	4.3.1.1	6	CGCAGTCGTAGGGTCCCGCCGGGTT
ERR119824	ERR119824	Nepal	2009	Thanh et al 2016	4.3.1.1	6	CGCAGTCGTAGGGTCCCGCCGGGTT
ERR119823	ERR119823	Nepal	2009	Thanh et al 2016	4.3.1.1	6	CGCAGTCGTAGGGTCCCGCCGGGTT
ERR119825	ERR119825	Nepal	2009	Thanh et al 2016	4.3.1.1	6	CGCAGTCGTAGGGTCCCGCCGGGTT
ERR119820	ERR119820	Nepal	2009	Thanh et al 2016	4.3.1.1	6	CGCAGTCGTAGGGTCCCGCCGGGTT
10071_8_92	ERR338161	Kenya	2008	Wong et al 2016	4.3.1.2.EA2	6	CGCAGTCGTAGGGTCCCGCCGAGTT
16549_8_34	ERR1010122	Kenya	2013	Park et al 2018	4.3.1.2.EA2	6	CGCAGTCGTAGGGTCCCGCCGAGTT
22204_7_193	ERR3332578	Kenya	2016	This study	4.3.1.2.EA2	6	CGCAGTCGTAGGGTCCCGCCGAGTT
24276_3_197	ERR2909543	Kenya	2013	This study	4.3.1.2.EA2	6	CGCAGTCGTAGGGTCCCGCCGAGTT
16549_8_10	ERR1010098	Kenya	2012	Park et al 2018	4.3.1.1.EA1	6	CGCAGTCGTAGGGTCCCACCTGGTT
10071_8_67	ERR338136	Kenya	2008	Wong et al 2016	4.3.1.1.EA1	6	CGCAGTCGTAGGGTCCCACCGGGTT
10071_8_90	ERR338159	Kenya	2009	Wong et al 2016	4.3.1.1.EA1	6	CGCAGTCGTAGGGTCCCACCGGGTT
10071_8_91	ERR338160	Kenya	2008	Wong et al 2016	4.3.1.1.EA1	6	CGCAGTCGTAGGGTCCCACCGGGTT
10071_8_94	ERR338163	Kenya	2008	Wong et al 2016	4.3.1.1.EA1	6	CGCAGTCGTAGGGTCCCACCGGGTT
16404_5_85	ERR984876	Kenya	2012	Park et al 2018	4.3.1.1.EA1	6	CGCAGTCGTAGGGTCCCACCGGGTT
22204_7_130	ERR3332551	Kenya	2015	This study	4.3.1.1.EA1	6	CGCAGTCGTAGGGTCCCACCGGGTT
22306_3_184	ERR3332726	Kenya	2014	This study	4.3.1.1.EA1	6	CGCAGTCGTAGGGTCCCACCGGGTT
22306_3_205	ERR3332744	Kenya	2013	This study	4.3.1.1.EA1	6	CGCAGTCGTAGGGTCCCACCGGGTT
22306_3_206	ERR3332745	Kenya	2013	This study	4.3.1.1.EA1	6	CGCAGTCGTAGGGTCCCACCGGGTT
22306_3_207	ERR3332746	Kenya	2014	This study	4.3.1.1.EA1	6	CGCAGTCGTAGGGTCCCACCGGGTT
22306_3_55	ERR3332633	Kenya	2014	This study	4.3.1.1.EA1	6	CGCAGTCGTAGGGTCCCACCGGGTT
22306_3_56	ERR3332634	Kenya	2013	This study	4.3.1.1.EA1	6	CGCAGTCGTAGGGTCCCACCGGGTT
8525_2_54	ERR212564	Kenya	2008	Wong et al 2016	4.3.1.1.EA1	6	CGCAGTCGTAGGGTCCCACCGGGTT
8525_3_30	ERR212636	Kenya	2008	Wong et al 2016	4.3.1.1.EA1	6	CGCAGTCGTAGGGTCCCACCGGGTT
8525_3_58	ERR212664	Kenya	2008	Wong et al 2016	4.3.1.1.EA1	6	CGCAGTCGTAGGGTCCCACCGGGTT
10608_2_67	ERR360999	Cambodia	2012	Wong et al 2016	4.3.1.1	6	CGCAGTCGTAGGGTCACGCCGGGTT
22306_3_92	ERR3332659	Kenya	2015	This study	4.3.1.2.EA2	6	CGCAGTCGTAGGGCCCCGCCGGGTT
24276_3_163	ERR2909515	Kenya	2015	This study	4.3.1.2.EA2	6	CGCAGTCGTAGGGCCCCGCCGGGTT
10561_2_24	ERR357599	Vietnam	1994	Wong et al 2016	4.3.1.1	6	CGCAGTCGTAGGATCCCGCCGGGTT
9870_8_14	ERR319415	Cambodia	2009	Wong et al 2016	4.3.1.1	6	CGCAGTCGTAGAGTCCCGCCGGGTT
22204_7_104	ERR3332541	Kenya	2015	This study	4.3.1.2.EA2	6	CGCAGTCGTAG---------GGGTT
22204_7_223	ERR2525493	Kenya	2015	This study	4.3.1.2.EA2	6	CGCAGTCGTAG---------GGGTT
22306_3_188	ERR3332729	Kenya	2014	This study	4.3.1.2.EA2	6	CGCAGTCGTAG---------GGGTT
10426_1_19	ERR349541	Vietnam	1995	Wong et al 2016	4.3.1.1	6	CGCAGTCGCAGGGTCCCGCCGGGTC
16549_7_20	ERR1010018	Kenya	2012	Park et al 2018	4.3.1.1.EA1	6	CGCAGTCATAGGGTCCCGCTGGATT
10071_8_63	ERR338132	Kenya	2008	Wong et al 2016	4.3.1.1.EA1	6	CGCAGTCATAGGGTCCCGCCGGGTT
10071_8_68	ERR338137	Kenya	2007	Wong et al 2016	4.3.1.1.EA1	6	CGCAGTCATAGGGTCCCGCCGGGTT
10071_8_71	ERR338140	Kenya	2009	Wong et al 2016	4.3.1.1.EA1	6	CGCAGTCATAGGGTCCCGCCGGGTT
10071_8_72	ERR338141	Kenya	2007	Wong et al 2016	4.3.1.1.EA1	6	CGCAGTCATAGGGTCCCGCCGGGTT
10071_8_74	ERR338143	Kenya	2008	Wong et al 2016	4.3.1.1.EA1	6	CGCAGTCATAGGGTCCCGCCGGGTT
10071_8_76	ERR338145	Kenya	2007	Wong et al 2016	4.3.1.1.EA1	6	CGCAGTCATAGGGTCCCGCCGGGTT
10071_8_82	ERR338151	Kenya	2008	Wong et al 2016	4.3.1.1.EA1	6	CGCAGTCATAGGGTCCCGCCGGGTT
10071_8_83	ERR338152	Kenya	2007	Wong et al 2016	4.3.1.1.EA1	6	CGCAGTCATAGGGTCCCGCCGGGTT
10071_8_88	ERR338157	Kenya	2007	Wong et al 2016	4.3.1.1.EA1	6	CGCAGTCATAGGGTCCCGCCGGGTT
16404_4_59	ERR984761	Kenya	2012	Park et al 2018	4.3.1.1.EA1	6	CGCAGTCATAGGGTCCCGCCGGGTT
16404_4_65	ERR984767	Kenya	2013	Park et al 2018	4.3.1.1.EA1	6	CGCAGTCATAGGGTCCCGCCGGGTT
16404_4_66	ERR984768	Kenya	2012	Park et al 2018	4.3.1.1.EA1	6	CGCAGTCATAGGGTCCCGCCGGGTT
16404_4_73	ERR984774	Kenya	2012	Park et al 2018	4.3.1.1.EA1	6	CGCAGTCATAGGGTCCCGCCGGGTT
16404_5_44	ERR984835	Kenya	2012	Park et al 2018	4.3.1.1.EA1	6	CGCAGTCATAGGGTCCCGCCGGGTT
16404_5_45	ERR984836	Kenya	2013	Park et al 2018	4.3.1.1.EA1	6	CGCAGTCATAGGGTCCCGCCGGGTT
16404_5_52	ERR984843	Kenya	2012	Park et al 2018	4.3.1.1.EA1	6	CGCAGTCATAGGGTCCCGCCGGGTT
16549_8_16	ERR1010104	Kenya	2012	Park et al 2018	4.3.1.1.EA1	6	CGCAGTCATAGGGTCCCGCCGGGTT
16549_8_31	ERR1010119	Kenya	2013	Park et al 2018	4.3.1.1.EA1	6	CGCAGTCATAGGGTCCCGCCGGGTT
16549_8_63	ERR1010148	Kenya	2012	Park et al 2018	4.3.1.1.EA1	6	CGCAGTCATAGGGTCCCGCCGGGTT
22204_7_161	ERR3332562	Kenya	2013	This study	4.3.1.1.EA1	6	CGCAGTCATAGGGTCCCGCCGGGTT
22204_7_216	ERR2525488	Kenya	2015	This study	4.3.1.1.EA1	6	CGCAGTCATAGGGTCCCGCCGGGTT
22204_7_261	ERR2525515	Kenya	2015	This study	4.3.1.1.EA1	6	CGCAGTCATAGGGTCCCGCCGGGTT
22306_3_155	ERR3332701	Kenya	2015	This study	4.3.1.1.EA1	6	CGCAGTCATAGGGTCCCGCCGGGTT
22306_3_197	ERR3332737	Kenya	2014	This study	4.3.1.1.EA1	6	CGCAGTCATAGGGTCCCGCCGGGTT
22306_3_218	ERR3332750	Kenya	2015	This study	4.3.1.1.EA1	6	CGCAGTCATAGGGTCCCGCCGGGTT
22306_3_225	ERR3332755	Kenya	2014	This study	4.3.1.1.EA1	6	CGCAGTCATAGGGTCCCGCCGGGTT
22306_3_247	ERR3332769	Kenya	2014	This study	4.3.1.1.EA1	6	CGCAGTCATAGGGTCCCGCCGGGTT
22306_3_38	ERR3332623	Kenya	2013	This study	4.3.1.1.EA1	6	CGCAGTCATAGGGTCCCGCCGGGTT
24276_3_126	ERR2909487	Kenya	2016	This study	4.3.1.1.EA1	6	CGCAGTCATAGGGTCCCGCCGGGTT
24276_3_155	ERR2909508	Kenya	2015	This study	4.3.1.1.EA1	6	CGCAGTCATAGGGTCCCGCCGGGTT
24276_3_180	ERR2909532	Kenya	2016	This study	4.3.1.1.EA1	6	CGCAGTCATAGGGTCCCGCCGGGTT
24276_3_256	ERR2909592	Kenya	2015	This study	4.3.1.1.EA1	6	CGCAGTCATAGGGTCCCGCCGGGTT
24276_3_277	ERR2909611	Kenya	2013	This study	4.3.1.1.EA1	6	CGCAGTCATAGGGTCCCGCCGGGTT
8525_3_32	ERR212638	Kenya	2008	Wong et al 2016	4.3.1.1.EA1	6	CGCAGTCATAGGGTCCCGCCGGGTT
8525_3_33	ERR212639	Kenya	2008	Wong et al 2016	4.3.1.1.EA1	6	CGCAGTCATAGGGTCCCGCCGGGTT
8525_3_34	ERR212640	Kenya	2008	Wong et al 2016	4.3.1.1.EA1	6	CGCAGTCATAGGGTCCCGCCGGGTT
8525_3_37	ERR212643	Kenya	2008	Wong et al 2016	4.3.1.1.EA1	6	CGCAGTCATAGGGTCCCGCCGGGTT
8525_3_42	ERR212648	Kenya	2008	Wong et al 2016	4.3.1.1.EA1	6	CGCAGTCATAGGGTCCCGCCGGGTT
8525_3_45	ERR212651	Kenya	2008	Wong et al 2016	4.3.1.1.EA1	6	CGCAGTCATAGGGTCCCGCCGGGTT
8525_3_46	ERR212652	Kenya	2008	Wong et al 2016	4.3.1.1.EA1	6	CGCAGTCATAGGGTCCCGCCGGGTT
8525_3_48	ERR212654	Kenya	2008	Wong et al 2016	4.3.1.1.EA1	6	CGCAGTCATAGGGTCCCGCCGGGTT
8525_3_49	ERR212655	Kenya	2008	Wong et al 2016	4.3.1.1.EA1	6	CGCAGTCATAGGGTCCCGCCGGGTT
8525_3_51	ERR212657	Kenya	2008	Wong et al 2016	4.3.1.1.EA1	6	CGCAGTCATAGGGTCCCGCCGGGTT
8525_3_54	ERR212660	Kenya	2008	Wong et al 2016	4.3.1.1.EA1	6	CGCAGTCATAGGGTCCCGCCGGGTT
8525_3_55	ERR212661	Kenya	2008	Wong et al 2016	4.3.1.1.EA1	6	CGCAGTCATAGGGTCCCGCCGGGTT
8525_3_56	ERR212662	Kenya	2008	Wong et al 2016	4.3.1.1.EA1	6	CGCAGTCATAGGGTCCCGCCGGGTT
8525_3_59	ERR212665	Kenya	2008	Wong et al 2016	4.3.1.1.EA1	6	CGCAGTCATAGGGTCCCGCCGGGTT
8525_3_60	ERR212666	Kenya	2008	Wong et al 2016	4.3.1.1.EA1	6	CGCAGTCATAGGGTCCCGCCGGGTT
8525_3_61	ERR212667	Kenya	2008	Wong et al 2016	4.3.1.1.EA1	6	CGCAGTCATAGGGTCCCGCCGGGTT
22204_8_178	ERR4921815	Kenya	2013	This study	4.3.1.1.EA1	6	CGCAGTCATAGGGTCCCGCCGGGAT
16404_4_46	ERR984748	Kenya	2012	Park et al 2018	4.3.1.1.EA1	6	CGCAGTCATAGGGTCCCGCCGGATT
16404_4_80	ERR984781	Kenya	2012	Park et al 2018	4.3.1.1.EA1	6	CGCAGTCATAGGGTCCCGCCGGATT
16404_4_87	ERR984788	Kenya	2012	Park et al 2018	4.3.1.1.EA1	6	CGCAGTCATAGGGTCCCGCCGGATT
16404_4_89	ERR984790	Kenya	2013	Park et al 2018	4.3.1.1.EA1	6	CGCAGTCATAGGGTCCCGCCGGATT
16404_5_35	ERR984826	Kenya	2012	Park et al 2018	4.3.1.1.EA1	6	CGCAGTCATAGGGTCCCGCCGGATT
16404_5_37	ERR984828	Kenya	2012	Park et al 2018	4.3.1.1.EA1	6	CGCAGTCATAGGGTCCCGCCGGATT
16404_5_51	ERR984842	Kenya	2012	Park et al 2018	4.3.1.1.EA1	6	CGCAGTCATAGGGTCCCGCCGGATT
16404_5_53	ERR984844	Kenya	2012	Park et al 2018	4.3.1.1.EA1	6	CGCAGTCATAGGGTCCCGCCGGATT
16404_5_60	ERR984851	Kenya	2012	Park et al 2018	4.3.1.1.EA1	6	CGCAGTCATAGGGTCCCGCCGGATT
16404_5_68	ERR984859	Kenya	2012	Park et al 2018	4.3.1.1.EA1	6	CGCAGTCATAGGGTCCCGCCGGATT
16404_5_75	ERR984866	Kenya	2012	Park et al 2018	4.3.1.1.EA1	6	CGCAGTCATAGGGTCCCGCCGGATT
16404_5_76	ERR984867	Kenya	2012	Park et al 2018	4.3.1.1.EA1	6	CGCAGTCATAGGGTCCCGCCGGATT
16404_5_77	ERR984868	Kenya	2012	Park et al 2018	4.3.1.1.EA1	6	CGCAGTCATAGGGTCCCGCCGGATT
16404_5_84	ERR984875	Kenya	2012	Park et al 2018	4.3.1.1.EA1	6	CGCAGTCATAGGGTCCCGCCGGATT
16549_7_18	ERR1010016	Kenya	2012	Park et al 2018	4.3.1.1.EA1	6	CGCAGTCATAGGGTCCCGCCGGATT
16549_7_23	ERR1010021	Kenya	2012	Park et al 2018	4.3.1.1.EA1	6	CGCAGTCATAGGGTCCCGCCGGATT
16549_8_1	ERR1010089	Kenya	2012	Park et al 2018	4.3.1.1.EA1	6	CGCAGTCATAGGGTCCCGCCGGATT
16549_8_17	ERR1010105	Kenya	2012	Park et al 2018	4.3.1.1.EA1	6	CGCAGTCATAGGGTCCCGCCGGATT
16549_8_18	ERR1010106	Kenya	2012	Park et al 2018	4.3.1.1.EA1	6	CGCAGTCATAGGGTCCCGCCGGATT
16549_8_33	ERR1010121	Kenya	2012	Park et al 2018	4.3.1.1.EA1	6	CGCAGTCATAGGGTCCCGCCGGATT
16549_8_47	ERR1010133	Kenya	2012	Park et al 2018	4.3.1.1.EA1	6	CGCAGTCATAGGGTCCCGCCGGATT
16549_8_48	ERR1010134	Kenya	2012	Park et al 2018	4.3.1.1.EA1	6	CGCAGTCATAGGGTCCCGCCGGATT
16549_8_54	ERR1010140	Kenya	2012	Park et al 2018	4.3.1.1.EA1	6	CGCAGTCATAGGGTCCCGCCGGATT
16549_8_8	ERR1010096	Kenya	2012	Park et al 2018	4.3.1.1.EA1	6	CGCAGTCATAGGGTCCCGCCGGATT
16549_8_9	ERR1010097	Kenya	2012	Park et al 2018	4.3.1.1.EA1	6	CGCAGTCATAGGGTCCCGCCGGATT
24276_3_150	ERR3332779	Kenya	2016	This study	4.3.1.1.EA1	6	CGCAGTCATAGGGTCCCGCCGGATT
8525_3_47	ERR212653	Kenya	2008	Wong et al 2016	4.3.1.1.EA1	6	CGCAGTCATAGGGTCCCGCCGGATT
16549_8_2	ERR1010090	Kenya	2012	Park et al 2018	4.3.1.1.EA1	6	CGCAGTC-TAGGGTCCCGCCGGATT
10608_2_49	ERR360985	Cambodia	2012	Wong et al 2016	4.3.1.1	6	CGCAGT-GTAGGGTCCCGCCGGGTT
16404_4_5	ERR984707	Kenya	2012	Park et al 2018	4.3.1.1.EA1	6	CGCAGCCATAGGGTCCCGCCGGGTT
16404_4_75	ERR984776	Kenya	2012	Park et al 2018	4.3.1.1.EA1	6	CGCAGCCATAGGGTCCCGCCGGGTT
16404_5_36	ERR984827	Kenya	2012	Park et al 2018	4.3.1.1.EA1	6	CGCAGCCATAGGGTCCCGCCGGGTT
16404_5_43	ERR984834	Kenya	2012	Park et al 2018	4.3.1.1.EA1	6	CGCAGCCATAGGGTCCCGCCGGGTT
16404_5_67	ERR984858	Kenya	2012	Park et al 2018	4.3.1.1.EA1	6	CGCAGCCATAGGGTCCCGCCGGGTT
16549_7_4	ERR1010003	Kenya	2012	Park et al 2018	4.3.1.1.EA1	6	CGCAGCCATAGGGTCCCGCCGGGTT
10060_6_31	ERR331328	Laos	2008	Wong et al 2016	4.3.1.1	6	CGCAATCGTAGGGTCCCGCCGGGTT
10060_6_38	ERR331335	Laos	2003	Wong et al 2016	4.3.1.1	6	CGCAATCGTAGGGTCCCGCCGGGTT
10060_6_39	ERR331336	Laos	2003	Wong et al 2016	4.3.1.1	6	CGCAATCGTAGGGTCCCGCCGGGTT
10060_6_47	ERR331344	Laos	2003	Wong et al 2016	4.3.1.1	6	CGCAATCGTAGGGTCCCGCCGGGTT
10060_6_49	ERR331346	Laos	2003	Wong et al 2016	4.3.1.1	6	CGCAATCGTAGGGTCCCGCCGGGTT
10060_6_54	ERR331351	Laos	2004	Wong et al 2016	4.3.1.1	6	CGCAATCGTAGGGTCCCGCCGGGTT
10060_6_55	ERR331352	Laos	2004	Wong et al 2016	4.3.1.1	6	CGCAATCGTAGGGTCCCGCCGGGTT
10209_5_46	ERR340802	Laos	2000	Wong et al 2016	4.3.1.1	6	CGCAATCGTAGGGTCCCGCCGGGTT
10209_5_50	ERR340806	Laos	2002	Wong et al 2016	4.3.1.1	6	CGCAATCGTAGGGTCCCGCCGGGTT
10209_5_51	ERR340807	Laos	2000	Wong et al 2016	4.3.1.1	6	CGCAATCGTAGGGTCCCGCCGGGTT
10209_5_53	ERR340809	Laos	2000	Wong et al 2016	4.3.1.1	6	CGCAATCGTAGGGTCCCGCCGGGTT
10209_5_58	ERR340812	Laos	2003	Wong et al 2016	4.3.1.1	6	CGCAATCGTAGGGTCCCGCCGGGTT
10209_5_61	ERR340815	Laos	2000	Wong et al 2016	4.3.1.1	6	CGCAATCGTAGGGTCCCGCCGGGTT
10592_2_22	ERR360470	Pakistan	2003	Wong et al 2016	4.3.1.2	6	CGCA---GTAGGGTCCCGCCGGGTT
9870_8_63	ERR319464	Cambodia	2011	Wong et al 2016	4.3.1.1	6	CACAGTCGTAGGGTCCCGCCGGGTT
10426_1_12	ERR349534	Vietnam	1995	Wong et al 2016	4.3.1.1	6	AGCAGTCGTAGGGTCCCGCCGGGTT
10426_1_96	ERR349617	Vietnam	1994	Wong et al 2016	4.3.1.1	6	AGCAGTCGTAGGGTCCCGCCGGGTT
10540_1_89	ERR352711	Vietnam	1994	Wong et al 2016	4.3.1.1	6	AGCAGTCGTAGGGTCCCGCCGGGTT
16549_7_55	ERR1010053	Ghana	2011	Park et al 2018	3.1.1	Untypable	-
16399_4_32	ERR998590	Ghana	Missing	Park et al 2018	3.1.1	Untypable	-
16404_4_82	ERR984783	Kenya	2012	Park et al 2018	4.3.1.1.EA1	Untypable	-
16404_6_76	ERR984955	Ghana	Missing	Park et al 2018	3.1.1	Untypable	-
16549_8_82	ERR1010167	Ghana	Missing	Park et al 2018	3.1.1	Untypable	-
16404_5_88	ERR984879	Ghana	2011	Park et al 2018	3.1.1	Untypable	-
16404_6_63	ERR984942	Ghana	Missing	Park et al 2018	3.1.1	Untypable	-
16404_5_11	ERR984802	Ghana	2010	Park et al 2018	3.1.1	Untypable	-
19787_3_5	ERR1556058	Uganda	2015	Park et al 2018	4.3.1.2.EA3	Untypable	-
16399_3_26	ERR998494	Ghana	Missing	Park et al 2018	3.1.1	Untypable	-
16404_5_41	ERR984832	Ghana	2011	Park et al 2018	3.1.1	Untypable	-
19787_3_19	ERR1556072	Uganda	2015	Park et al 2018	4.3.1.2.EA3	Untypable	-
16549_7_69	ERR1010066	Ghana	2010	Park et al 2018	3.1.1	Untypable	-
16404_4_88	ERR984789	Ghana	2011	Park et al 2018	3.1.1	Untypable	-
19787_3_8	ERR1556061	Uganda	2015	Park et al 2018	4.3.1.2.EA3	Untypable	-
16549_8_4	ERR1010092	Ghana	2012	Park et al 2018	3.1.1	Untypable	-
16399_3_12	ERR998480	Ghana	Missing	Park et al 2018	3.1.1	Untypable	-
19787_3_14	ERR1556067	Uganda	2015	Park et al 2018	4.3.1.2.EA3	Untypable	-
19787_3_13	ERR1556066	Uganda	2015	Park et al 2018	4.3.1.2.EA3	Untypable	-
16404_5_23	ERR984814	Ghana	2010	Park et al 2018	3.1.1	Untypable	-
16404_6_58	ERR984938	Ghana	Missing	Park et al 2018	3.1.1	Untypable	-
19787_3_1	ERR1556054	Uganda	2015	Park et al 2018	4.3.1.2.EA3	Untypable	-
16549_7_12	ERR1010011	Ghana	2010	Park et al 2018	3.1.1	Untypable	-
16549_7_36	ERR1010034	Ghana	2010	Park et al 2018	3.1.1	Untypable	-
19787_3_30	ERR1556083	Uganda	2015	Park et al 2018	4.3.1.2.EA3	Untypable	-
16549_7_46	ERR1010044	Ghana	2011	Park et al 2018	3.1.1	2	-
16399_3_2	ERR998470	Ghana	Missing	Park et al 2018	3.1.1	2	-
16549_7_84	ERR1010081	Ghana	2011	Park et al 2018	3.1.1	2	-
16549_8_15	ERR1010103	Ghana	2011	Park et al 2018	3.1.1	2	-
16549_7_56	ERR1010054	Ghana	2011	Park et al 2018	3.1.1	2	-
16549_7_78	ERR1010075	Ghana	2011	Park et al 2018	3.1.1	2	-
16549_8_30	ERR1010118	Ghana	Missing	Park et al 2018	3.1.1	2	-
16404_5_81	ERR984872	Ghana	2012	Park et al 2018	3.1.1	2	-
16549_7_45	ERR1010043	Ghana	2012	Park et al 2018	3.1.1	2	-
16404_6_27	ERR984909	Ghana	Missing	Park et al 2018	3.1.1	2	-
16549_8_23	ERR1010111	Ghana	2011	Park et al 2018	3.1.1	2	-
16404_5_33	ERR984824	Ghana	2011	Park et al 2018	3.1.1	2	-
16549_8_6	ERR1010094	Ghana	2011	Park et al 2018	3.1.1	2	-
16549_7_51	ERR1010049	Ghana	2010	Park et al 2018	3.1.1	2	-
16404_6_12	ERR984894	Ghana	Missing	Park et al 2018	3.1.1	2	-
16404_6_13	ERR984895	Ghana	Missing	Park et al 2018	3.1.1	2	-
16404_5_64	ERR984855	Ghana	Missing	Park et al 2018	3.1.1	2	-
16404_6_46	ERR984926	Ghana	Missing	Park et al 2018	3.1.1	2	-
16404_5_50	ERR984841	Ghana	Missing	Park et al 2018	3.1.1	2	-
16404_4_81	ERR984782	Ghana	2010	Park et al 2018	3.1.1	2	-
16549_8_46	ERR1010132	Ghana	2011	Park et al 2018	3.1.1	2	-
16399_4_78	ERR998636	Ghana	Missing	Park et al 2018	3.1.1	2	-
16404_5_13	ERR984804	Ghana	2011	Park et al 2018	3.1.1	2	-
16404_5_4	ERR984795	Ghana	2011	Park et al 2018	3.1.1	2	-
16549_7_33	ERR1010031	Ghana	2011	Park et al 2018	3.1.1	2	-
16404_4_47	ERR984749	Ghana	2010	Park et al 2018	3.1.1	2	-
16404_6_9	ERR984891	Ghana	2011	Park et al 2018	3.1.1	2	-
16404_5_57	ERR984848	Ghana	2011	Park et al 2018	3.1.1	2	-
16549_7_91	ERR1010088	Ghana	2010	Park et al 2018	3.1.1	2	-
16404_6_89	ERR984968	Ghana	Missing	Park et al 2018	3.1.1	2	-
16549_8_22	ERR1010110	Ghana	2011	Park et al 2018	3.1.1	2	-
16549_8_27	ERR1010115	Ghana	2010	Park et al 2018	3.1.1	2	-
16404_5_65	ERR984856	Ghana	2011	Park et al 2018	3.1.1	2	-
16549_8_5	ERR1010093	Ghana	2011	Park et al 2018	3.1.1	2	-
16549_7_89	ERR1010086	Ghana	Missing	Park et al 2018	3.1.1	2	-
16404_6_71	ERR984950	Ghana	Missing	Park et al 2018	3.1.1	2	-
16399_4_85	ERR998643	Ghana	Missing	Park et al 2018	3.1.1	2	-
16549_7_71	ERR1010068	Ghana	2011	Park et al 2018	3.1.1	2	-
16399_4_16	ERR998574	Ghana	2011	Park et al 2018	3.1.1	2	-
16549_8_80	ERR1010165	Ghana	Missing	Park et al 2018	3.1.1	2	-
16404_5_79	ERR984870	Ghana	2012	Park et al 2018	3.1.1	2	-
16404_6_33	ERR984915	Ghana	2011	Park et al 2018	3.1.1	2	-
16404_5_6	ERR984797	Ghana	2012	Park et al 2018	3.1.1	2	-
16404_5_55	ERR984846	Ghana	2011	Park et al 2018	3.1.1	2	-
16404_5_2	ERR984793	Ghana	2010	Park et al 2018	3.1.1	2	-
16404_5_91	ERR984882	Ghana	2011	Park et al 2018	3.1.1	2	-
16549_8_45	ERR1010131	Ghana	Missing	Park et al 2018	3.1.1	2	-
16404_6_79	ERR984958	Ghana	2011	Park et al 2018	3.1.1	2	-
16549_7_83	ERR1010080	Ghana	2010	Park et al 2018	3.1.1	2	-
16549_7_35	ERR1010033	Ghana	2010	Park et al 2018	3.1.1	2	-
16404_5_90	ERR984881	Ghana	2011	Park et al 2018	3.1.1	2	-
16404_4_19	ERR984721	Ghana	Missing	Park et al 2018	3.1.1	2	-
ERR119817	ERR119817	Nepal	2008	Thanh et al 2016	4.1	2	-
9870_8_30	ERR319431	Cambodia	2010	Wong et al 2016	4.3.1.1	Untypable	-
7468_7_59	ERR108658	Tanzania	2009	Wong et al 2016	4.3.1.1.EA1	Untypable	-
7468_7_79	ERR108678	Tanzania	2009	Wong et al 2016	2.5.1	Untypable	-
7468_7_94	ERR108693	Tanzania	2009	Wong et al 2016	4.3.1.1.EA1	Untypable	-
9475_6_72	ERR279169	Malawi	2009	Wong et al 2016	2.2	Untypable	-
10561_2_35	ERR357610	Democratic Republic of the Congo	2011	Wong et al 2016	2.5.1	2	-
10593_2_48	ERR360661	Vietnam	1973	Wong et al 2016	4.1	4	-
10593_2_2	ERR360615	Mexico	1972	Wong et al 2016	2.3.2	3	-
10593_2_35	ERR360648	Cameroon	2004	Wong et al 2016	2.3.1	2	-
10593_2_34	ERR360647	Cameroon	2004	Wong et al 2016	2.3.1	2	-
10561_2_16	ERR357591	Democratic Republic of the Congo	2011	Wong et al 2016	2.5.1	2	-
10593_2_77	ERR360690	Cameroon	2005	Wong et al 2016	3.1.1	2	-
10593_2_69	ERR360682	Togo	2006	Wong et al 2016	3.1.1	2	-
10593_2_58	ERR360671	Benin	2004	Wong et al 2016	3.1.1	2	-
10593_2_17	ERR360630	Benin	2004	Wong et al 2016	3.1.1	2	-
10592_2_65	ERR360513	Cameroon	2009	Wong et al 2016	3.1.1	2	-
10540_1_7	ERR352604	Democratic Republic of the Congo	2011	Wong et al 2016	2.5.1	2	-
10426_1_4	ERR349526	Vietnam	1994	Wong et al 2016	2.5.1	2	-
10593_2_73	ERR360686	IvoryCoast	2008	Wong et al 2016	3.1.1	2	-
10593_2_56	ERR360669	Cameroon	2007	Wong et al 2016	2.3.1	2	-
10593_2_29	ERR360642	Indonesia	1976	Wong et al 2016	3.2.1	2	-
10592_2_75	ERR360523	Mauritania	2009	Wong et al 2016	3.1.1	2	-
10593_2_72	ERR360685	CAR	2006	Wong et al 2016	2.5.1	2	-
10593_2_74	ERR360687	France_Africanmeal	2009	Wong et al 2016	3.1.1	2	-
10593_2_57	ERR360670	Mali	2008	Wong et al 2016	3.1.1	2	-
10593_2_19	ERR360632	BurkinaFaso	2006	Wong et al 2016	3.1.1	2	-
10561_2_17	ERR357592	Democratic Republic of the Congo	2010	Wong et al 2016	2.5.1	2	-
10071_3_44	ERR338020	South Africa	2004	Wong et al 2016	2.4	2	-
10593_2_8	ERR360621	Togo	2004	Wong et al 2016	3.1.1	2	-
10593_2_53	ERR360666	Cameroon	2007	Wong et al 2016	2.3.1	2	-
10593_2_15	ERR360628	Cameroon	2007	Wong et al 2016	2.3.1	2	-
10592_2_82	ERR360530	Nigeria	2009	Wong et al 2016	3.1.1	2	-
10561_2_5	ERR357580	Democratic Republic of the Congo	2011	Wong et al 2016	2.5.1	2	-
10561_2_21	ERR357596	Democratic Republic of the Congo	2010	Wong et al 2016	2.5.1	2	-
10593_2_33	ERR360646	Angola	2005	Wong et al 2016	2.5.1	2	-
10561_2_60	ERR357635	Democratic Republic of the Congo	2010	Wong et al 2016	2.5.1	2	-
10593_2_65	ERR360678	CAR	2007	Wong et al 2016	2.5.1	2	-
10593_2_61	ERR360674	Cameroon	2006	Wong et al 2016	2.3.1	2	-
10593_2_64	ERR360677	Democratic Republic of the Congo	2008	Wong et al 2016	2.5.1	2	-
10593_2_36	ERR360649	Vietnam	1972	Wong et al 2016	3.4	2	-
10561_2_48	ERR357623	Democratic Republic of the Congo	2011	Wong et al 2016	2.5.1	2	-
10593_2_62	ERR360675	BurkinaFaso	2006	Wong et al 2016	3.1.1	2	-
10593_2_66	ERR360679	Cameroon	2006	Wong et al 2016	2.3.1	2	-
10593_2_28	ERR360641	Benin	2009	Wong et al 2016	3.1.1	2	-
10540_1_2	ERR352599	Vietnam	1994	Wong et al 2016	2.5.1	2	-
10540_1_5	ERR352602	Democratic Republic of the Congo	2011	Wong et al 2016	2.5.1	2	-
10592_2_76	ERR360524	Cameroon	2006	Wong et al 2016	2.3.1	2	-
10561_2_4	ERR357579	Democratic Republic of the Congo	2011	Wong et al 2016	2.5.1	2	-
10593_2_32	ERR360645	France_Africanmeal	2009	Wong et al 2016	3.1.1	2	-
10592_2_37	ERR360485	India	1977	Wong et al 2016	2.5	2	-
10593_2_20	ERR360633	IvoryCoast	2007	Wong et al 2016	3.1.1	2	-
10426_1_3	ERR349525	Democratic Republic of the Congo	2011	Wong et al 2016	2.5.1	2	-
10561_2_29	ERR357604	Democratic Republic of the Congo	2010	Wong et al 2016	2.5.1	2	-
11800_1_14	ERR1017041	Unknown	2005	Wong et al 2016	3.1.1	2	-
11800_1_87	ERR1017096	Nigeria	2009	Wong et al 2016	3.1.1	2	-
10209_5_30	ERR340786	Laos	2001	Wong et al 2016	3.2.1	1	-
10209_5_29	ERR340785	Laos	2001	Wong et al 2016	3.2.1	1	-
