# Supplementary material for: Multiple introductions of multidrug-resistant typhoid associated with acute infection and asymptomatic carriage, Kenya
Source: eLife journal article supplement (doi:10.7554/elife.67852), 2021-09-13
Supplement: supp [file elife-67852-supp-v1.zip › elife_poa_e67852_Supplementary_file_5.xlsx]

## Sheet: Supplementary_table_5_pAKU1_exc
start	end
3772	4539
22060	24444
38517	45014
69376	74333
88259	108837
132983	133750
135340	136105
137299	144003
155801	178840
