# Supplementary material for: Multiple introductions of multidrug-resistant typhoid associated with acute infection and asymptomatic carriage, Kenya
Source: eLife journal article supplement (doi:10.7554/elife.67852), 2021-09-13
Supplement: supp [file elife-67852-supp-v1.zip › elife_poa_e67852_Supplementary_file_13.xlsx]

## Sheet: Supplementary_table_8_NS_mutati
Lane_and_tree_ID	Accession_number	Status	Study_area	Position_in_CT18	Ancestor_Allele	Derived_Allele	CT18_Gene_Name	Classification_code	Gene_product	Functional_category	Codon	Ancestor_Codon	Derived_Codon	Ancestor_Amino_Acid	Derived_Amino_Acid	Mutation
22204_8_178	ERR4921815	Control	Yes	4626124	C	A	ytfM/STY4768	4.1.0	Putative exported protein	Periplasmic/exported/lipoproteins	322	AAC	AAA	N	K	ytfM-N322K
24276_3_116	ERR2909477	Case	No	4021517	G	A	yhjW/STY4162	4.1.1	putative membrane protein	Inner membrane	168	GGC	AGC	G	S	yhjW-G168S
24276_3_116	ERR2909477	Case	No	3385249	C	T	yhcP/STY3545	4.1.1	Putative membrame protein	Inner membrane	106	TGT	TAT	C	Y	yhcP-C106Y
22204_7_236	ERR2525501	Control	Yes	2171000	G	A	yegD/STY2338	0.0.2	conserved hypothetical protein	Unknown function	183	GCC	ACC	A	T	yegD-A183T
22306_3_66	ERR3332641	Case	No	962807	T	C	ycaM/STY0967	1.5.0	Probable transport protein	Transport/binding protein	440	TTC	CTC	F	L	ycaM-F440L
22204_7_145	ERR3332555	Case	Yes	868216	T	G	ybiR/STY0877	4.1.1	Putative membrame protein	Inner membrane	322	TTT	GTT	F	V	ybiR-F322V
24276_3_146	ERR3332777	Case	No	662248	A	G	ybdQ/STY0662	0.0.2	Conserved hypothetical protein	Unknown function	128	TCA	CCA	S	P	ybdQ-S128P
22204_7_236	ERR2525501	Control	Yes	2143349	T	G	wzxC/STY2314	4.1.4	putative transmembrane transport protein	Surface polysaccharides and antigens	26	TTA	TTC	L	F	wzxC-L26F
22204_7_130	ERR3332551	Control	Yes	2160205	A	C	wza/STY2331	4.1.4	Putative polysaccharide export protein	Surface polysaccharides and antigens	137	GTC	GGC	V	G	wza-V137G
24276_3_129	ERR2909490	Case	No	4725276	A	T	uxuR/STY4862	6.1.1	uxu operon transcriptional regulator	Global regulatory functions	71	ATC	TTC	I	F	uxuR-I71F
24276_3_159	ERR2909511	Control	No	4517487	G	A	tviE/STY4656	5.1.5	Vi polysaccharide biosynthesis protein TviE Glycosyl transferases group 1	Surface polysaccharides and antigens	263	CCG	TCG	P	S	tviE-P263S
24276_3_194	ERR2909540	Control	Yes	4521071	G	A	tviD/STY4659	5.1.5	Vi polysaccharide biosynthesis protein	Surface polysaccharides and antigens	159	CGT	TGT	R	C	tviD-R159C
24276_3_135	ERR2909496	Case	No	4523895	C	T	tviB/STY4661	5.1.5	Vi polysaccharide biosynthesis protein UDP-glucose/GDP-mannose dehydrogenase	Surface polysaccharides and antigens	1	GTG	ATG	V	M	tviB-V1M
24276_3_149	ERR3332778	Case	No	1282526	G	A	trpB/STY1325	3.1.19	tryptophan synthase beta chain	Amino acid biosynthesis	35	GCG	GTG	A	V	trpB-A35V
24276_3_161	ERR2909513	Case	No	4653330	G	A	treB/STY4794	1.5.37	PTS system, trehalose-specific IIBC component	Transport/binding protein	323	ACC	ATC	T	I	treB-T323I
22204_7_111	ERR3332545	Control	Yes	4318042	C	T	STY4449	4.1.0	putative lipoprotein	Periplasmic/exported/lipoproteins	55	TGG	TAG	W	*	STY4449-W55*
24276_3_150	ERR3332779	Control	No	4104133	C	T	STY4236	4.1.1	putative membrane protein	Inner membrane	43	TGG	TAG	W	*	STY4236-W43*
24276_3_194	ERR2909540	Control	Yes	4102295	C	T	STY4235	1.5.30	heavy metal-transporting ATPase	Transport/binding protein	420	GGC	GAC	G	D	STY4235-G420D
24276_3_194	ERR2909540	Control	Yes	3788415	G	T	STY3925	1.5.37	probable PTS system permease	Transport/binding protein	38	GTT	TTT	V	F	STY3925-V38F
24276_3_146	ERR3332777	Case	No	3695295	G	A	STY3837	4.1.0	putative lipoprotein	Periplasmic/exported/lipoproteins	36	GCG	ACG	A	T	STY3837-A36T
22204_7_216	ERR2525488	Case	Yes	3628992	G	A	STY3765	0.0.0	hypothetical protein	Unknown function	377	CCG	TCG	P	S	STY3765-P377S
22306_3_185	ERR3332727	Control	Yes	3471310	A	C	STY3618	4.1.1	Putative membrame protein	Inner membrane	35	TTA	GTA	L	V	STY3618-L35V
24276_3_193	ERR2909539	Case	Yes	3471046	T	C	STY3618	4.1.1	Putative membrame protein	Inner membrane	123	ATT	GTT	I	V	STY3618-I123V
24276_3_116	ERR2909477	Case	No	3170381	G	T	STY3325	1.1.1	methyl-accepting chemotaxis protein (pseudogene)	Chemotaxis and mobility	493	GCG	GAG	A	E	STY3325-A493E
24276_3_182	ERR2909534	Case	Yes	3119041	G	A	STY3257	3.2.06	possible oxygen-independent coproporphyrinogen III oxidase	Biosynthesis of cofactors/carriers	82	GAC	AAC	D	N	STY3257-D82N
24276_3_194	ERR2909540	Control	Yes	2501788	C	T	STY2664	1.7.1	cell division protein	Cell division	299	GTC	ATC	V	I	STY2664-V299I
22204_7_130	ERR3332551	Control	Yes	2480004	G	C	STY2645	4.1.1	Putative membrame protein	Inner membrane	88	GAA	CAA	E	Q	STY2645-E88Q
22204_7_274	ERR3332596	Case	Yes	2399174	G	T	STY2563	7.0.0	putative sodium/sulphate transporter	Unclassified/putative function	557	TCC	TAC	S	Y	STY2563-S557Y
22204_7_216	ERR2525488	Case	Yes	2333750	T	C	STY2499	2.2.03	DNA gyrase subunit A	DNA - replication, repair, RM system	87	GAC	GGC	D	G	gyrA-D87G
22306_3_207	ERR3332746	Case	Yes	2333750	T	C	STY2499	2.2.03	DNA gyrase subunit A	DNA - replication, repair, RM system	87	GAC	GGC	D	G	gyrA-D87G
22204_7_232	ERR3332584	Control	Yes	2194420	G	A	STY2361	4.1.0	putative exported protein	Periplasmic/exported/lipoproteins	100	CCA	CTA	P	L	STY2361-P100L
22204_7_207	ERR3332580	Case	Yes	2051377	G	A	STY2216	4.1.1	putative inner membrane protein	Inner membrane	397	GCC	GTC	A	V	STY2216-A397V
22306_3_66	ERR3332641	Case	No	1749811	G	T	STY1831	0.0.2	Conserved hypothetical protein	Unknown function	110	GGA	TGA	G	*	STY1831-G110*
22204_7_274	ERR3332596	Case	Yes	1670239	G	A	STY1750	3.3.15	putative amintransferase	Central intermediary metabolism	9	CGG	TGG	R	W	STY1750-R9W
22306_3_66	ERR3332641	Case	No	1533338	T	C	STY1587	4.1.1	putative membrane protein	Inner membrane	77	GTA	GCA	V	A	STY1587-V77A
22204_7_105	ERR3332542	Case	No	1491452	A	G	STY1537	6.1.1	putative regulatory protein	Global regulatory functions	42	GAC	GGC	D	G	STY1537-D42G
22204_7_208	ERR3332581	Case	No	1456243	G	A	STY1499	0.0.0	hypothetical protein	Unknown function	187	CAA	TAA	Q	*	STY1499-Q187*
22306_3_66	ERR3332641	Case	No	1410841	T	C	STY1460	2.1.4	putative peptidase	Degradation of proteins, peptides, glyco	250	TAT	CAT	Y	H	STY1460-Y250H
22204_7_237	ERR3332585	Case	Yes	1396606	C	T	STY1443	4.1.0	putative exported protein	Periplasmic/exported/lipoproteins	185	CAG	TAG	Q	*	STY1443-Q185*
22306_3_66	ERR3332641	Case	No	1385997	T	C	STY1434	4.1.1	putative membrane protein	Inner membrane	274	AAC	AGC	N	S	STY1434-N274S
24276_3_116	ERR2909477	Case	No	1369705	C	T	STY1419	7.0.0	probable pyruvate-flavodoxin oxidoreductase	Unclassified/putative function	613	GCG	ACG	A	T	STY1419-A613T
22204_7_216	ERR2525488	Case	Yes	1239385	T	C	STY1284	5.1.5	putative invasin	Pathogenicity island-related function	466	TGG	CGG	W	R	STY1284-W466R
24276_3_135	ERR2909496	Case	No	1061235	A	G	STY1083	1.5.01	ABC transporter ATP-binding protein	Transport/binding protein	64	CAG	CGG	Q	R	STY1083-Q64R
22204_7_130	ERR3332551	Control	Yes	339327	G	A	STY0326	5.1.5	conserved hypothetical protein	Pathogenicity island-related function	84	TGG	TGA	W	*	STY0326-W84*
24276_3_150	ERR3332779	Control	No	337744	C	T	STY0324	5.1.5	Rhs-family protein	Pathogenicity island-related function	427	CAG	TAG	Q	*	STY0324-Q427*
22204_7_216	ERR2525488	Case	Yes	319124	C	T	STY0306	5.1.5	Putative membrame protein	Pathogenicity island-related function	36	CGT	TGT	R	C	STY0306-R36C
22204_7_216	ERR2525488	Case	Yes	306487	C	T	STY0290	5.1.5	conserved hypothetical protein	Pathogenicity island-related function	151	CGC	CAC	R	H	STY0290-R151H
22204_7_130	ERR3332551	Control	Yes	306208	C	T	STY0289	5.1.5	hypothetical protein	Pathogenicity island-related function	74	CGG	CAG	R	Q	STY0289-R74Q
22204_7_216	ERR2525488	Case	Yes	1641786	G	A	sscA/STY1721	5.1.5	putative Type III secretion system chaperone protein	Pathogenicity island-related function	142	CTC	TTC	L	F	sscA-L142F
24276_3_194	ERR2909540	Control	Yes	1874307	G	A	sopE2/STY1987	5.1.5	putative invasion-associated secreted protein sopE=STY4609	Pathogenicity island-related function	9	CAG	TAG	Q	*	sopE2-Q9*
22204_7_232	ERR3332584	Control	Yes	4603536	C	T	sgaH/STY4742	3.3.15	putative hexulose-6-phosphate synthase	Central intermediary metabolism	186	CAT	TAT	H	Y	sgaH-H186Y
24276_3_168	ERR2909520	Case	Yes	4227390	G	A	rpsG/STY4351	4.2.2	30S ribosomal subunit protein S7	Ribosome constituents	43	GTA	ATA	V	I	rpsG-V43I
22204_7_274	ERR3332596	Case	Yes	4606083	G	A	rpsF/STY4747	4.2.2	30s ribosomal protein S6	Ribosome constituents	9	ATG	ATA	M	I	rpsF-M9I
24276_3_194	ERR2909540	Control	Yes	4794595	C	T	rob/STY4933	1.2.1	right origin-binding protein	Chromosome replication	185	CGC	CAC	R	H	STY4933-R185H
22204_7_274	ERR3332596	Case	Yes	219180	C	T	pncB/STY0209	2.2.11	poly(A) polymerase	RNA synthesis/modification and DNA transcription	174	AGC	AAC	S	N	pcnB-S174N
22204_7_130	ERR3332551	Control	Yes	4080652	C	T	pitA/STY4214	1.5.23	putative low-affinity inorganic phosphate transporter	Transport/binding protein	340	CGT	CAT	R	H	STY4214-R340H
22306_3_68	ERR3332643	Control	Yes	687449	C	T	pbpA/STY0691	4.1.2	penicillin-binding protein 2	Murein sacculus/peptidoglycan	409	GGT	AGT	G	S	mrdA-G409S
24276_3_150	ERR3332779	Control	No	3892927	G	T	misL/STY403	5.1.5	putative virulence-associated autotransporter protein	Pathogenicity island-related function	402	CGC	AGC	R	S	misL-R402S
22204_7_274	ERR3332596	Case	Yes	2216980	G	A	metG/STY2384	2.2.01	methionyl-tRNA synthetase	Amino acyl tRNA synthesis & modification	554	GCA	ACA	A	T	metG-A554T
24276_3_168	ERR2909520	Case	Yes	4294622	T	G	malE/STY4425	1.5.03	periplasmic maltose-binding protein	Transport/binding protein	340	GAC	GCC	D	A	malE-D340A
22306_3_66	ERR3332641	Case	No	742865	T	C	kdpE/STY0743	6.1.1	KDP operon transcriptional regulatory protein	Global regulatory functions	3	AAC	AGC	N	S	kdpE-N3S
22204_7_232	ERR3332584	Control	Yes	2841954	G	A	hypf/STY2964	3.5.2	hydrogenase maturation protein	Anaerobic respiration	305	CCA	CTA	P	L	hydA-P305L
24276_3_150	ERR3332779	Control	No	1103229	C	A	hpcG/STY1139	3.4.3	2-oxo-hepta-3-ene-1,7-dioic acid hydratase	Degradation of carbon compounts	261	GCG	GAG	A	E	hpcG-A261E
22204_7_236	ERR2525501	Control	Yes	2420019	G	A	hisJ/STY2584	1.5.03	histidine-binding periplasmic protein	Transport/binding protein	92	TCG	TTG	S	L	hisJ-S92L
22204_7_130	ERR3332551	Control	Yes	3810322	C	T	gyrB/STY3943	2.2.03	DNA gyrase subunit B	DNA - replication, repair, RM system	464	TCC	TTC	S	F	gyrB-S464F
24276_3_135	ERR2909496	Case	No	4142147	G	A	glgC/STY4274	2.2.08	glucose-1-phosphate adenylyltransferase	Polysaccharide synthesis, modification	110	GGC	AGC	G	S	glgC-G110S
22306_3_66	ERR3332641	Case	No	2984469	T	C	fucI/STY3116	3.4.3	L-fuculose isomerase	Degradation of carbon compounts	238	TTC	CTC	F	L	fucI-F238L
24276_3_146	ERR3332777	Case	No	231921	G	A	fhuD/STY0220	1.5.23	ferrichrome-binding periplasmic protein precursor	Transport/binding protein	246	ATG	ATA	M	I	fhuD-M246I
24276_3_135	ERR2909496	Case	No	628273	G	A	fes/STY0629	1.5.23	enterochelin esterase	Transport/binding protein	51	TGG	TGA	W	*	fes-W51*
22204_7_236	ERR2525501	Control	Yes	3176266	G	A	exbB/STY3332	1.5.23	biopolymer transport ExbB protein	Transport/binding protein	54	CGC	TGC	R	C	exbB-R54C
24276_3_150	ERR3332779	Control	No	2038114	C	T	dcm/STY2200	2.2.03	DNA-cytosine methyltransferase	DNA - replication, repair, RM system	419	GCG	ACG	A	T	dcm-A419T
22204_8_178	ERR4921815	Control	Yes	1692237	C	A	btuC/STY1770	1.5.02	vitamin B12 transport system permease	Transport/binding protein	294	GCC	TCC	A	S	btuC-A294S
24276_3_135	ERR2909496	Case	No	4018331	C	A	bisC/STY4158	7.0.0	biotin sulfoxide reductase	Unclassified/putative function	570	CCG	CAG	P	Q	bisC-P570Q
24276_3_146	ERR3332777	Case	No	3346023	G	A	arcB/STY3507	6.1.1	aerobic respiration control sensor protein	Global regulatory functions	443	CCG	CTG	P	L	arcB-P443L
24276_3_135	ERR2909496	Case	No	2169799	C	T	alkA/STY2337	2.2.03	DNA-3-methyladenine glycosidase II	DNA - replication, repair, RM system	174	ATG	ATA	M	I	alkA-M174I
22204_7_274	ERR3332596	Case	Yes	2551336	C	T	aegA/STY2717	7.0.0	putative oxidoreductase	Unclassified/putative function	116	GCC	ACC	A	T	aegA-A116T
24276_3_197	ERR2909543	Control	Yes	2551116	G	T	aegA/STY2717	7.0.0	putative oxidoreductase	Unclassified/putative function	189	GCG	GAG	A	E	aegA-A189E
