# Supplementary figures and images for: Multiple introductions of multidrug-resistant typhoid associated with acute infection and asymptomatic carriage, Kenya
Source: eLife journal article supplement (doi:10.7554/elife.67852), 2021-09-13

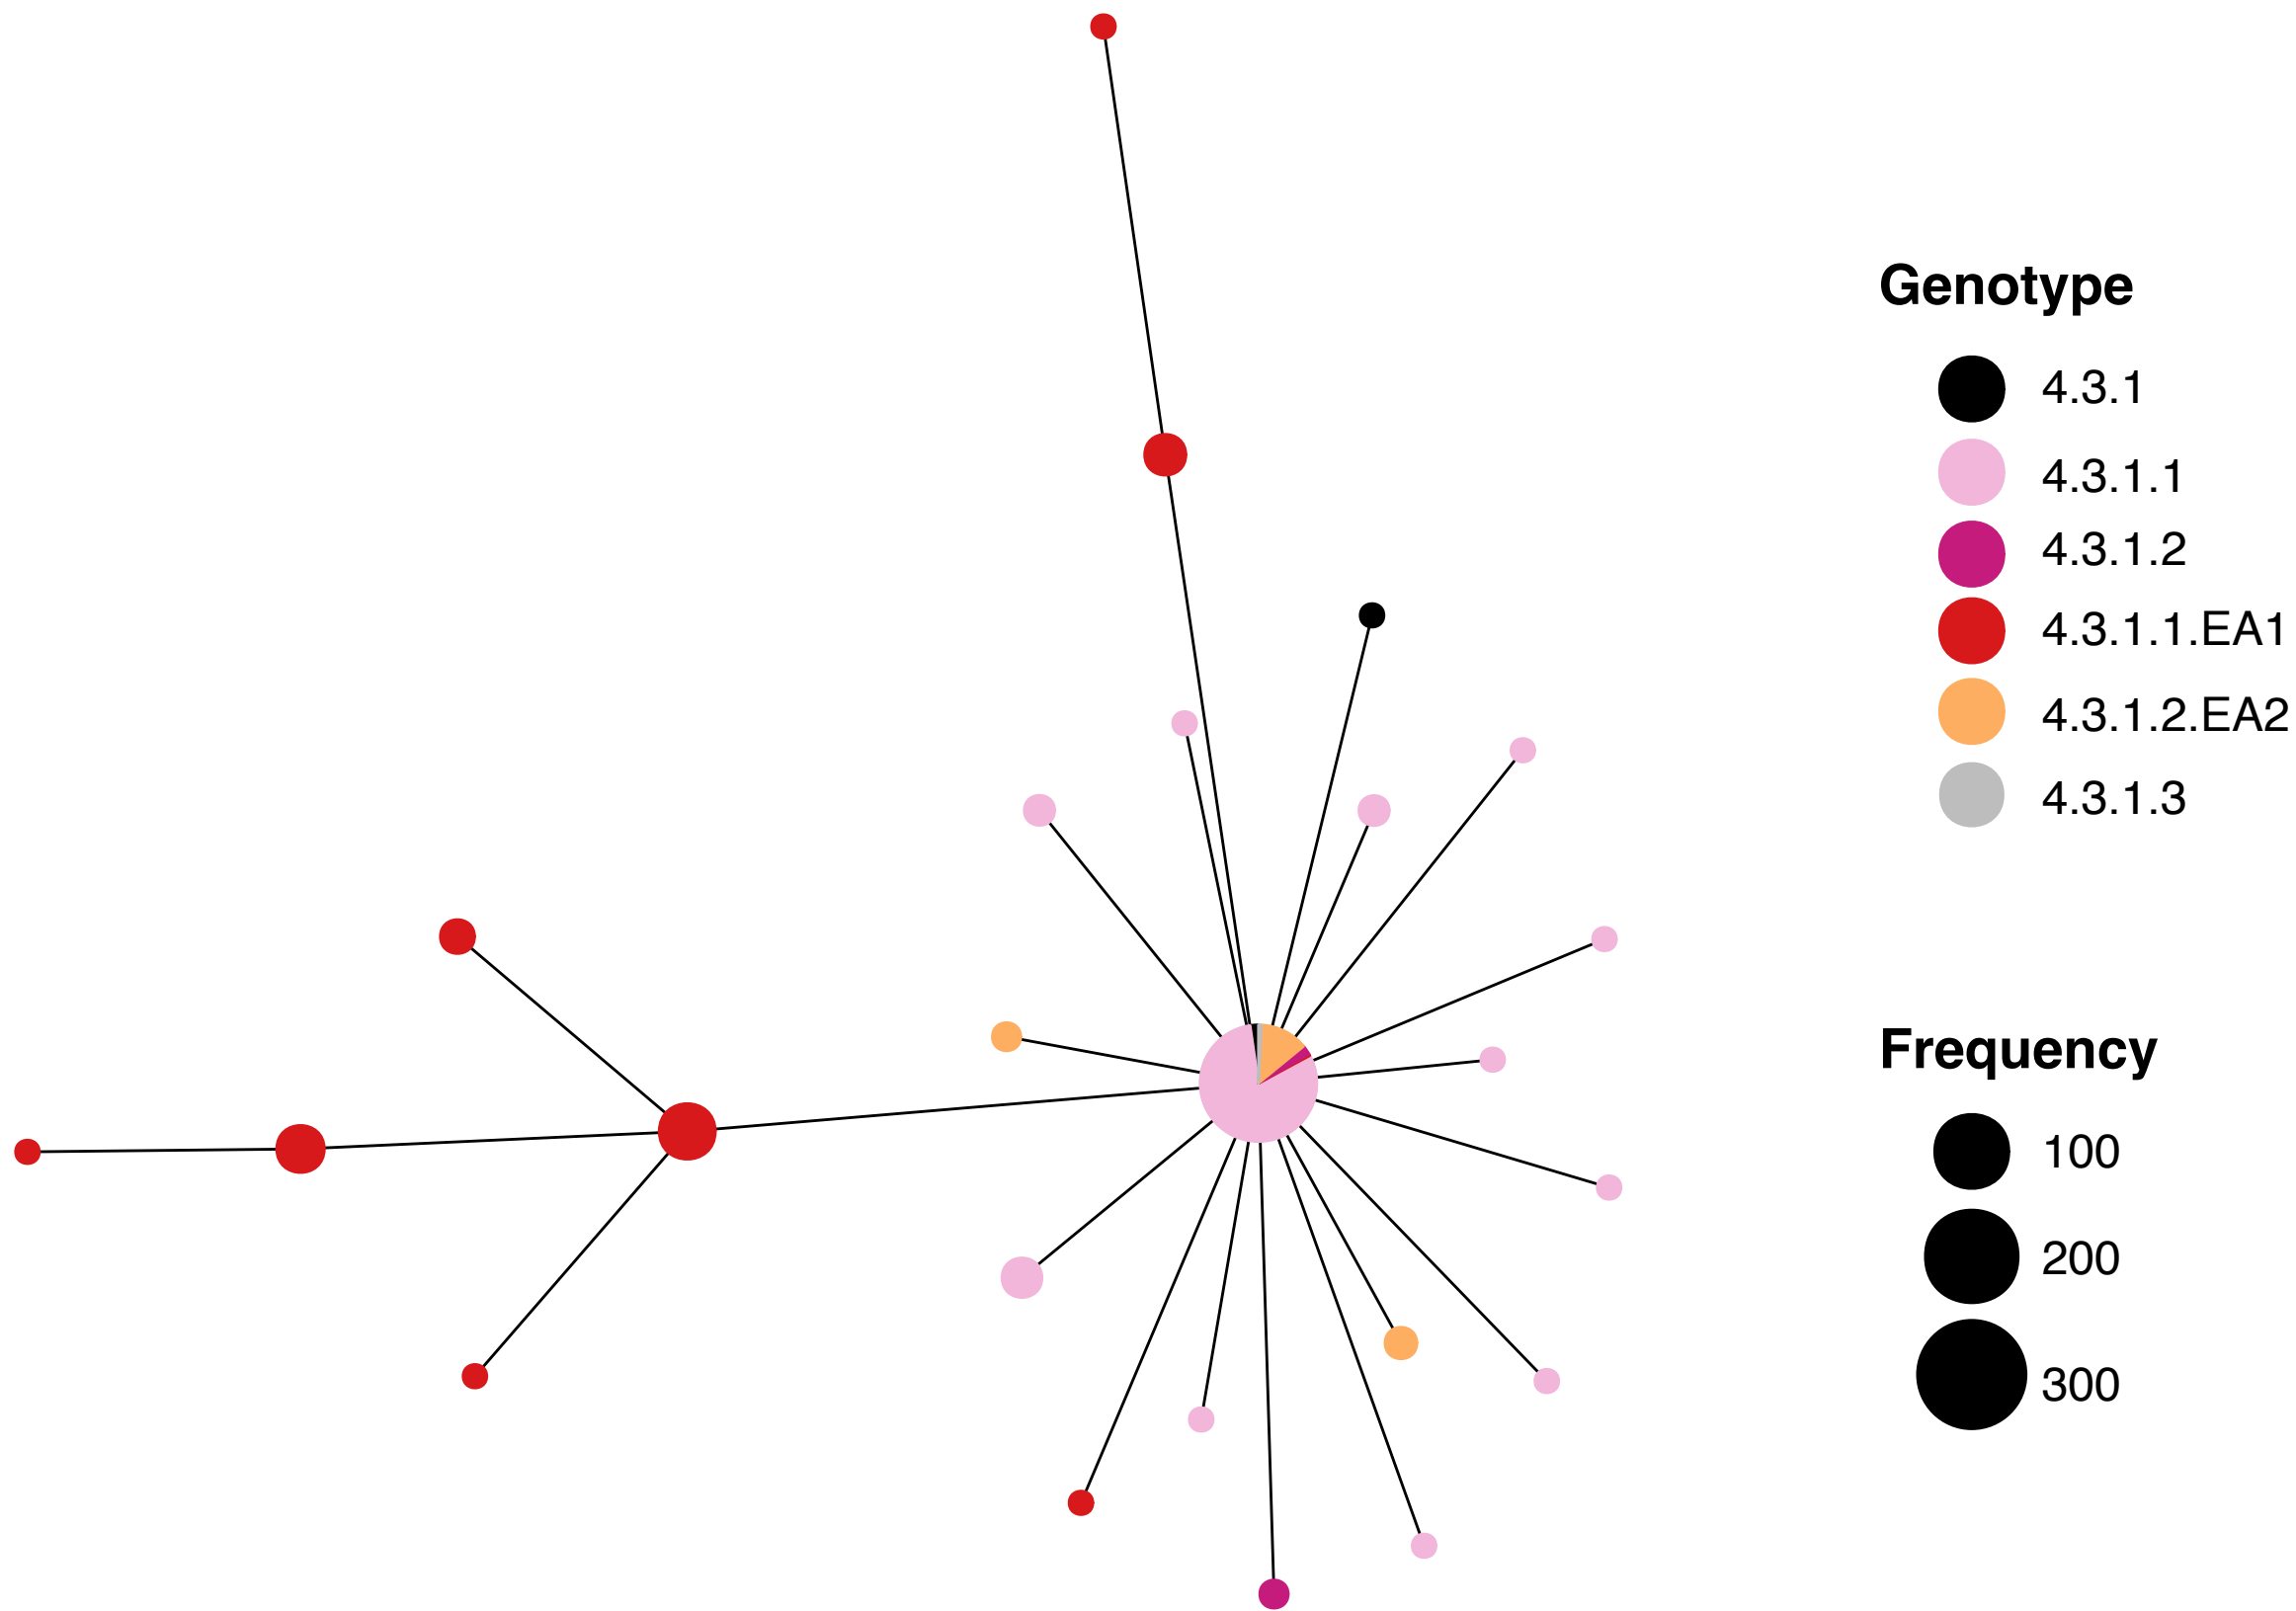

Supplement: supp [file elife-67852-supp-v1.zip › elife_poa_e67852_Figure_2_figure_supplement_1.pdf]

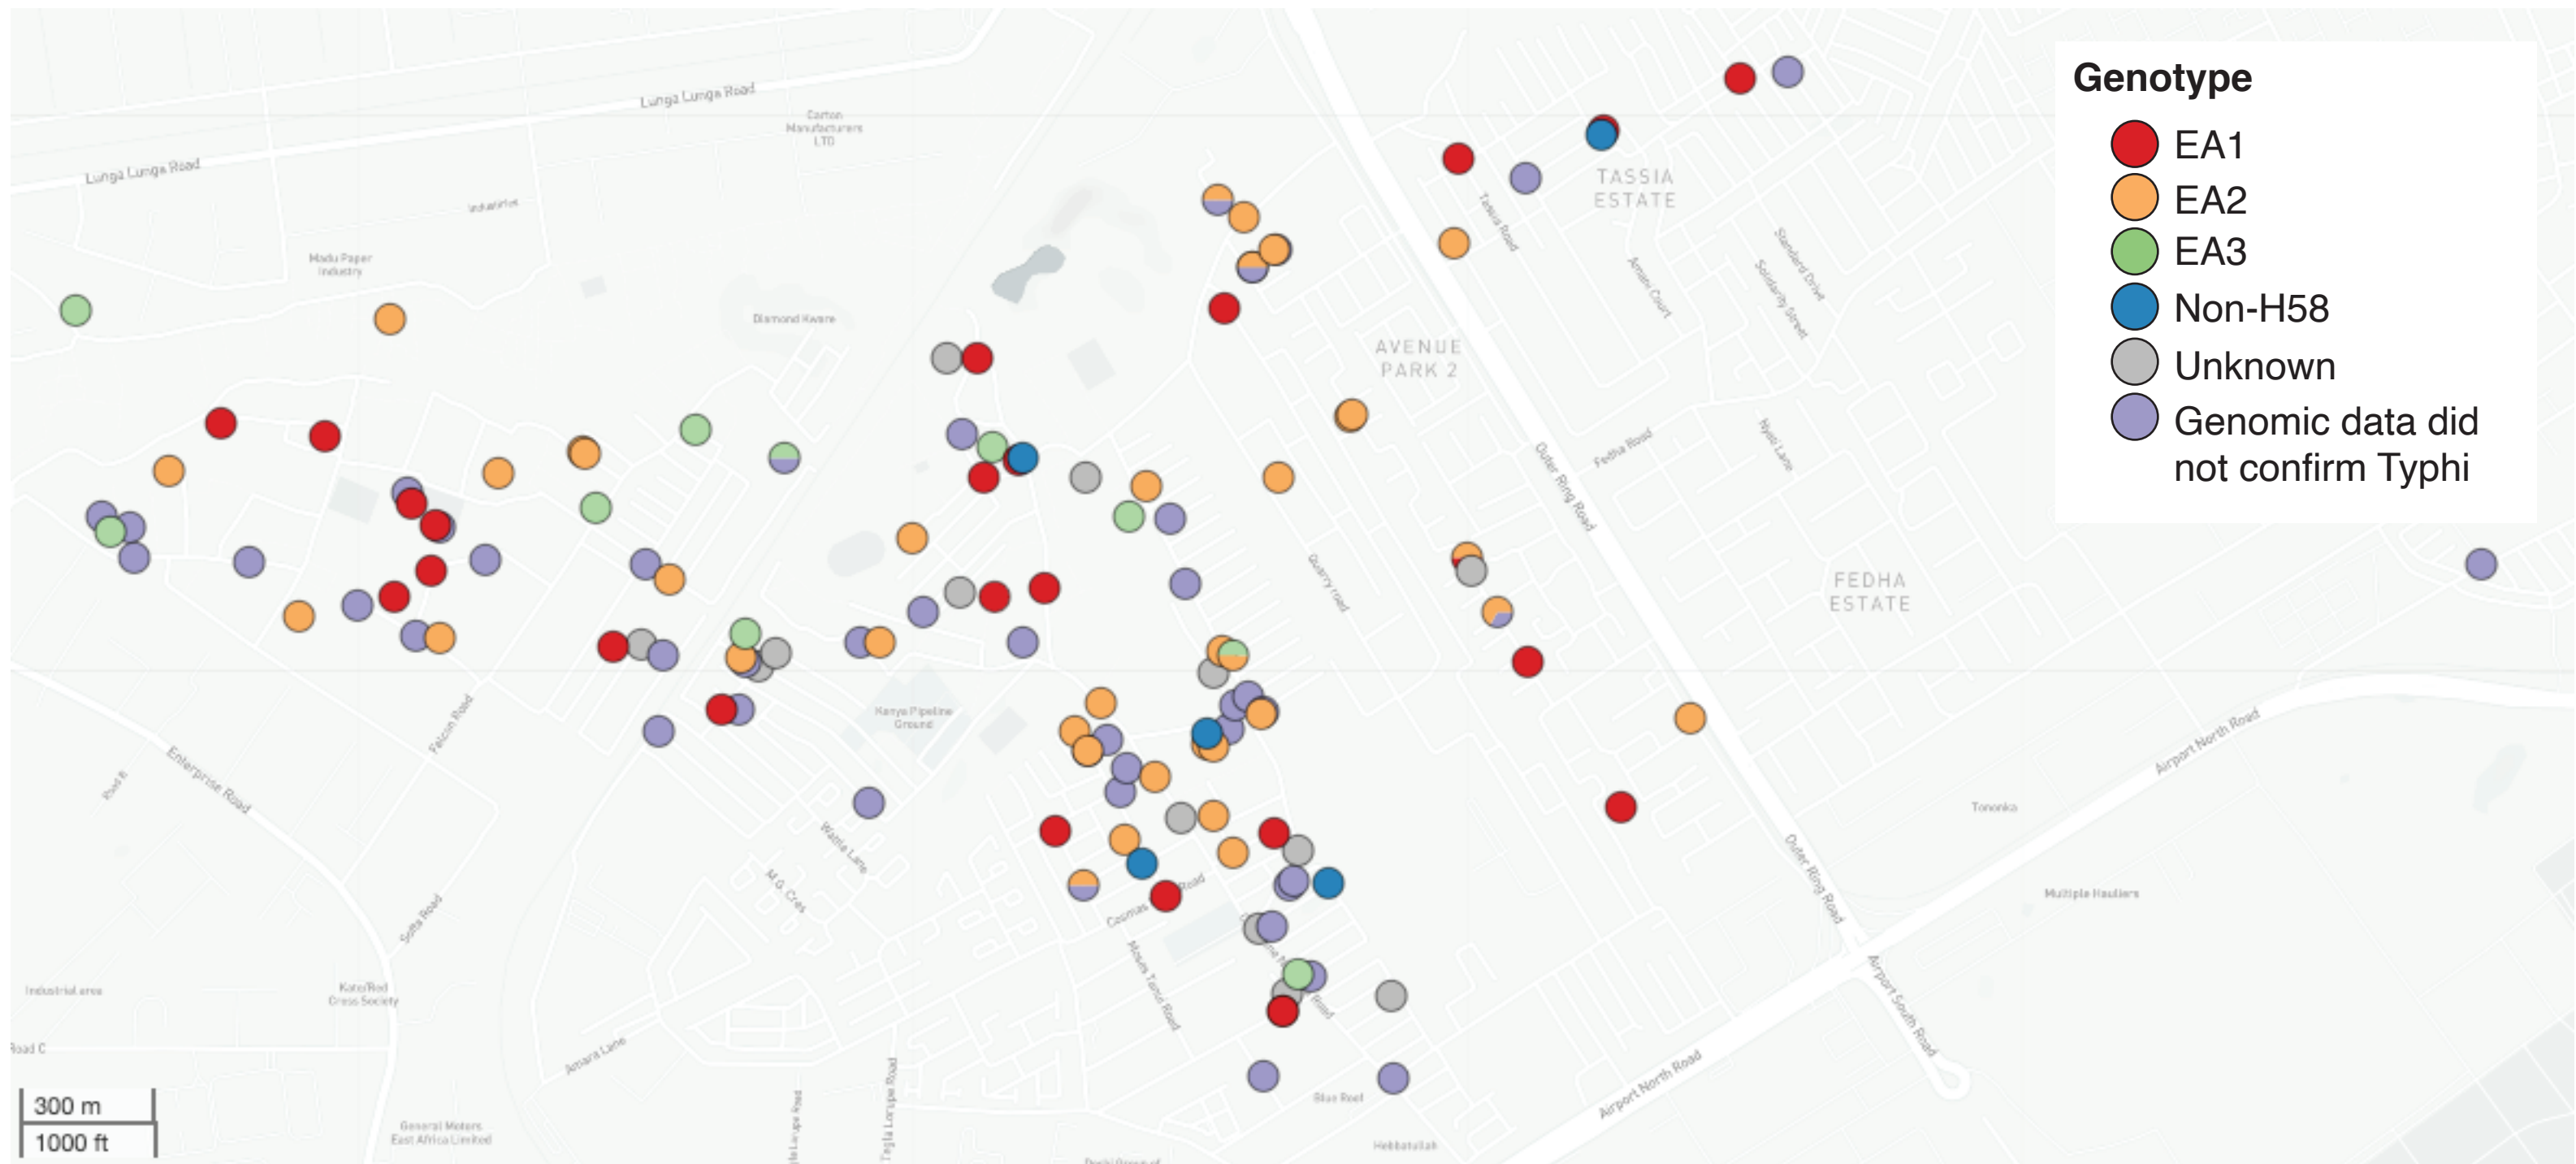

Supplement: supp [file elife-67852-supp-v1.zip › elife_poa_e67852_Figure_4_figure_supplement_1.pdf]

**A**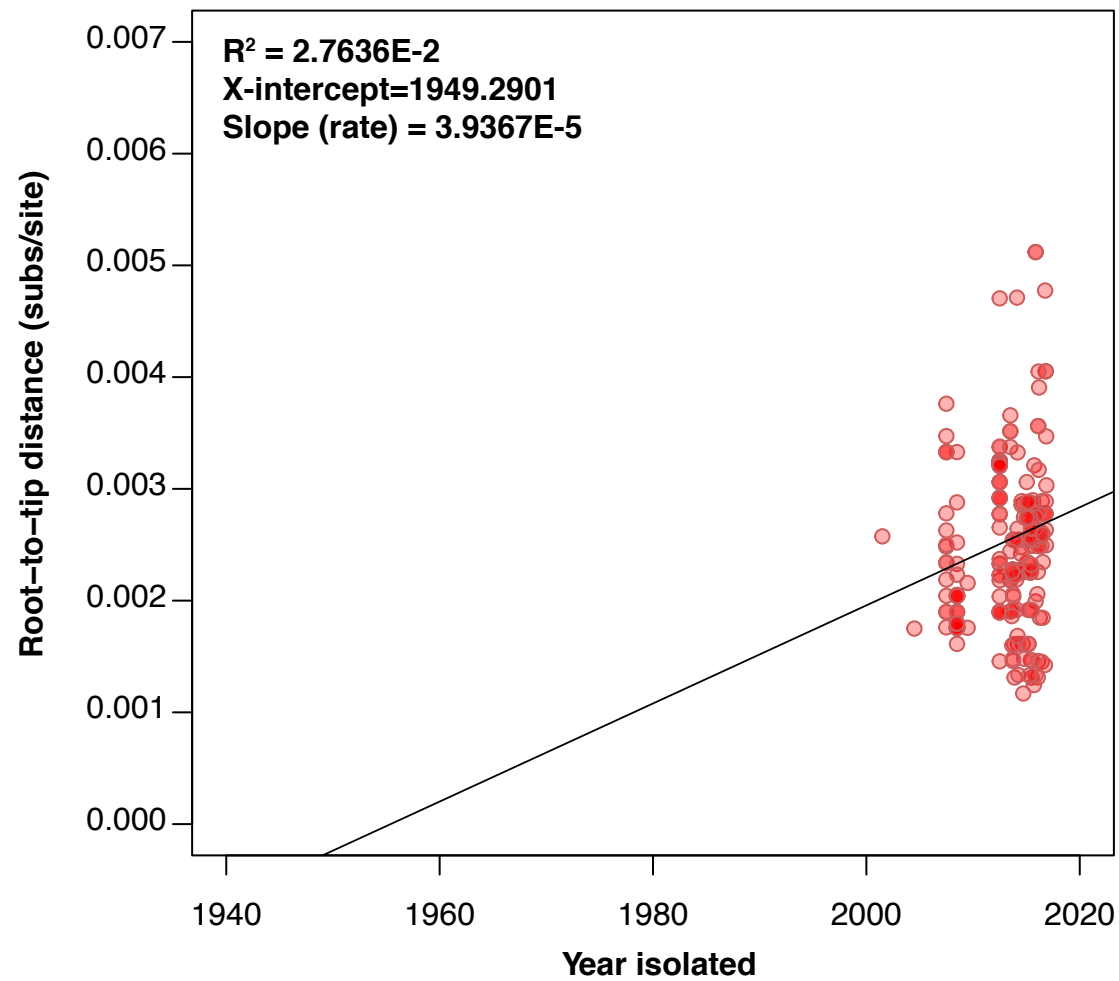**B**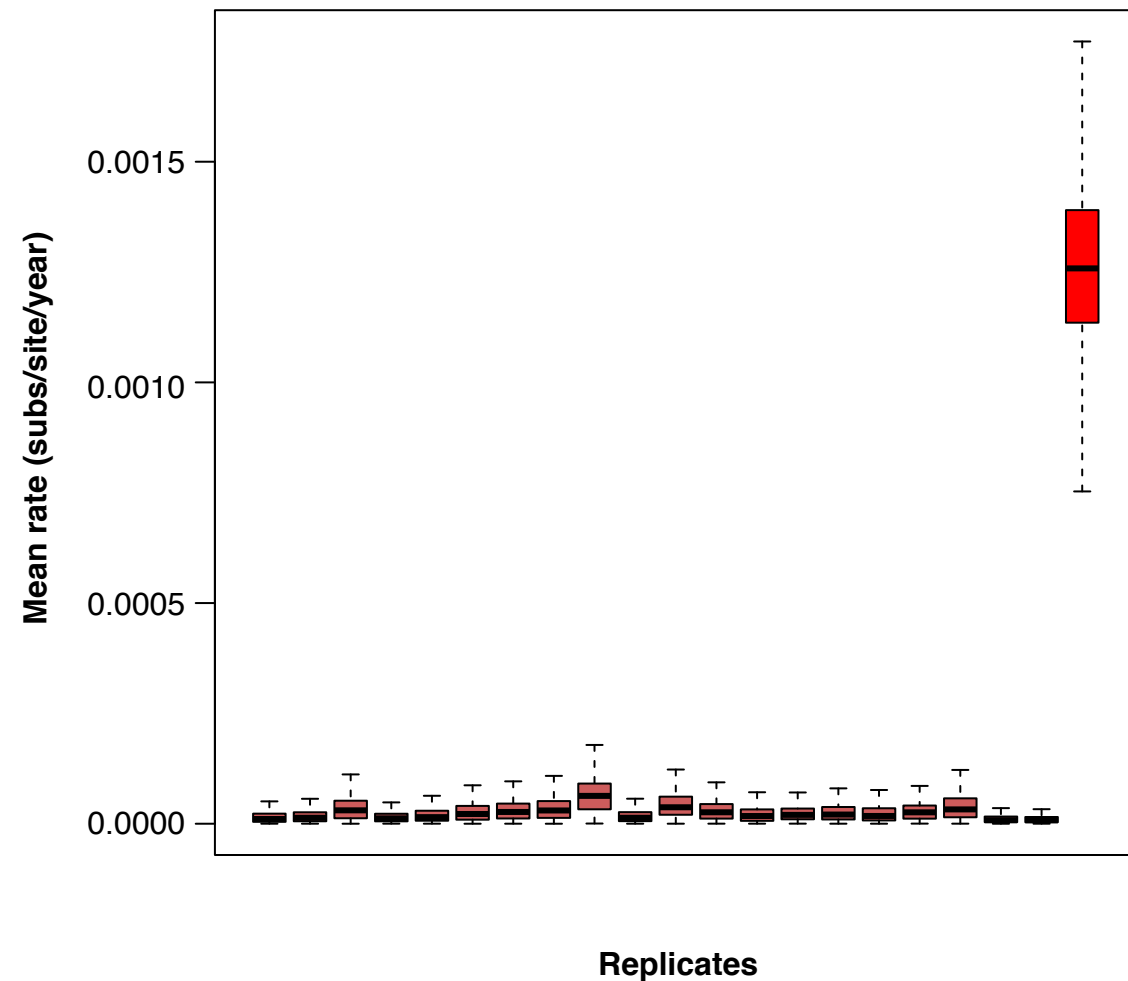

Supplement: supp [file elife-67852-supp-v1.zip › elife_poa_e67852_Figure_4_figure_supplement_2.pdf]

A

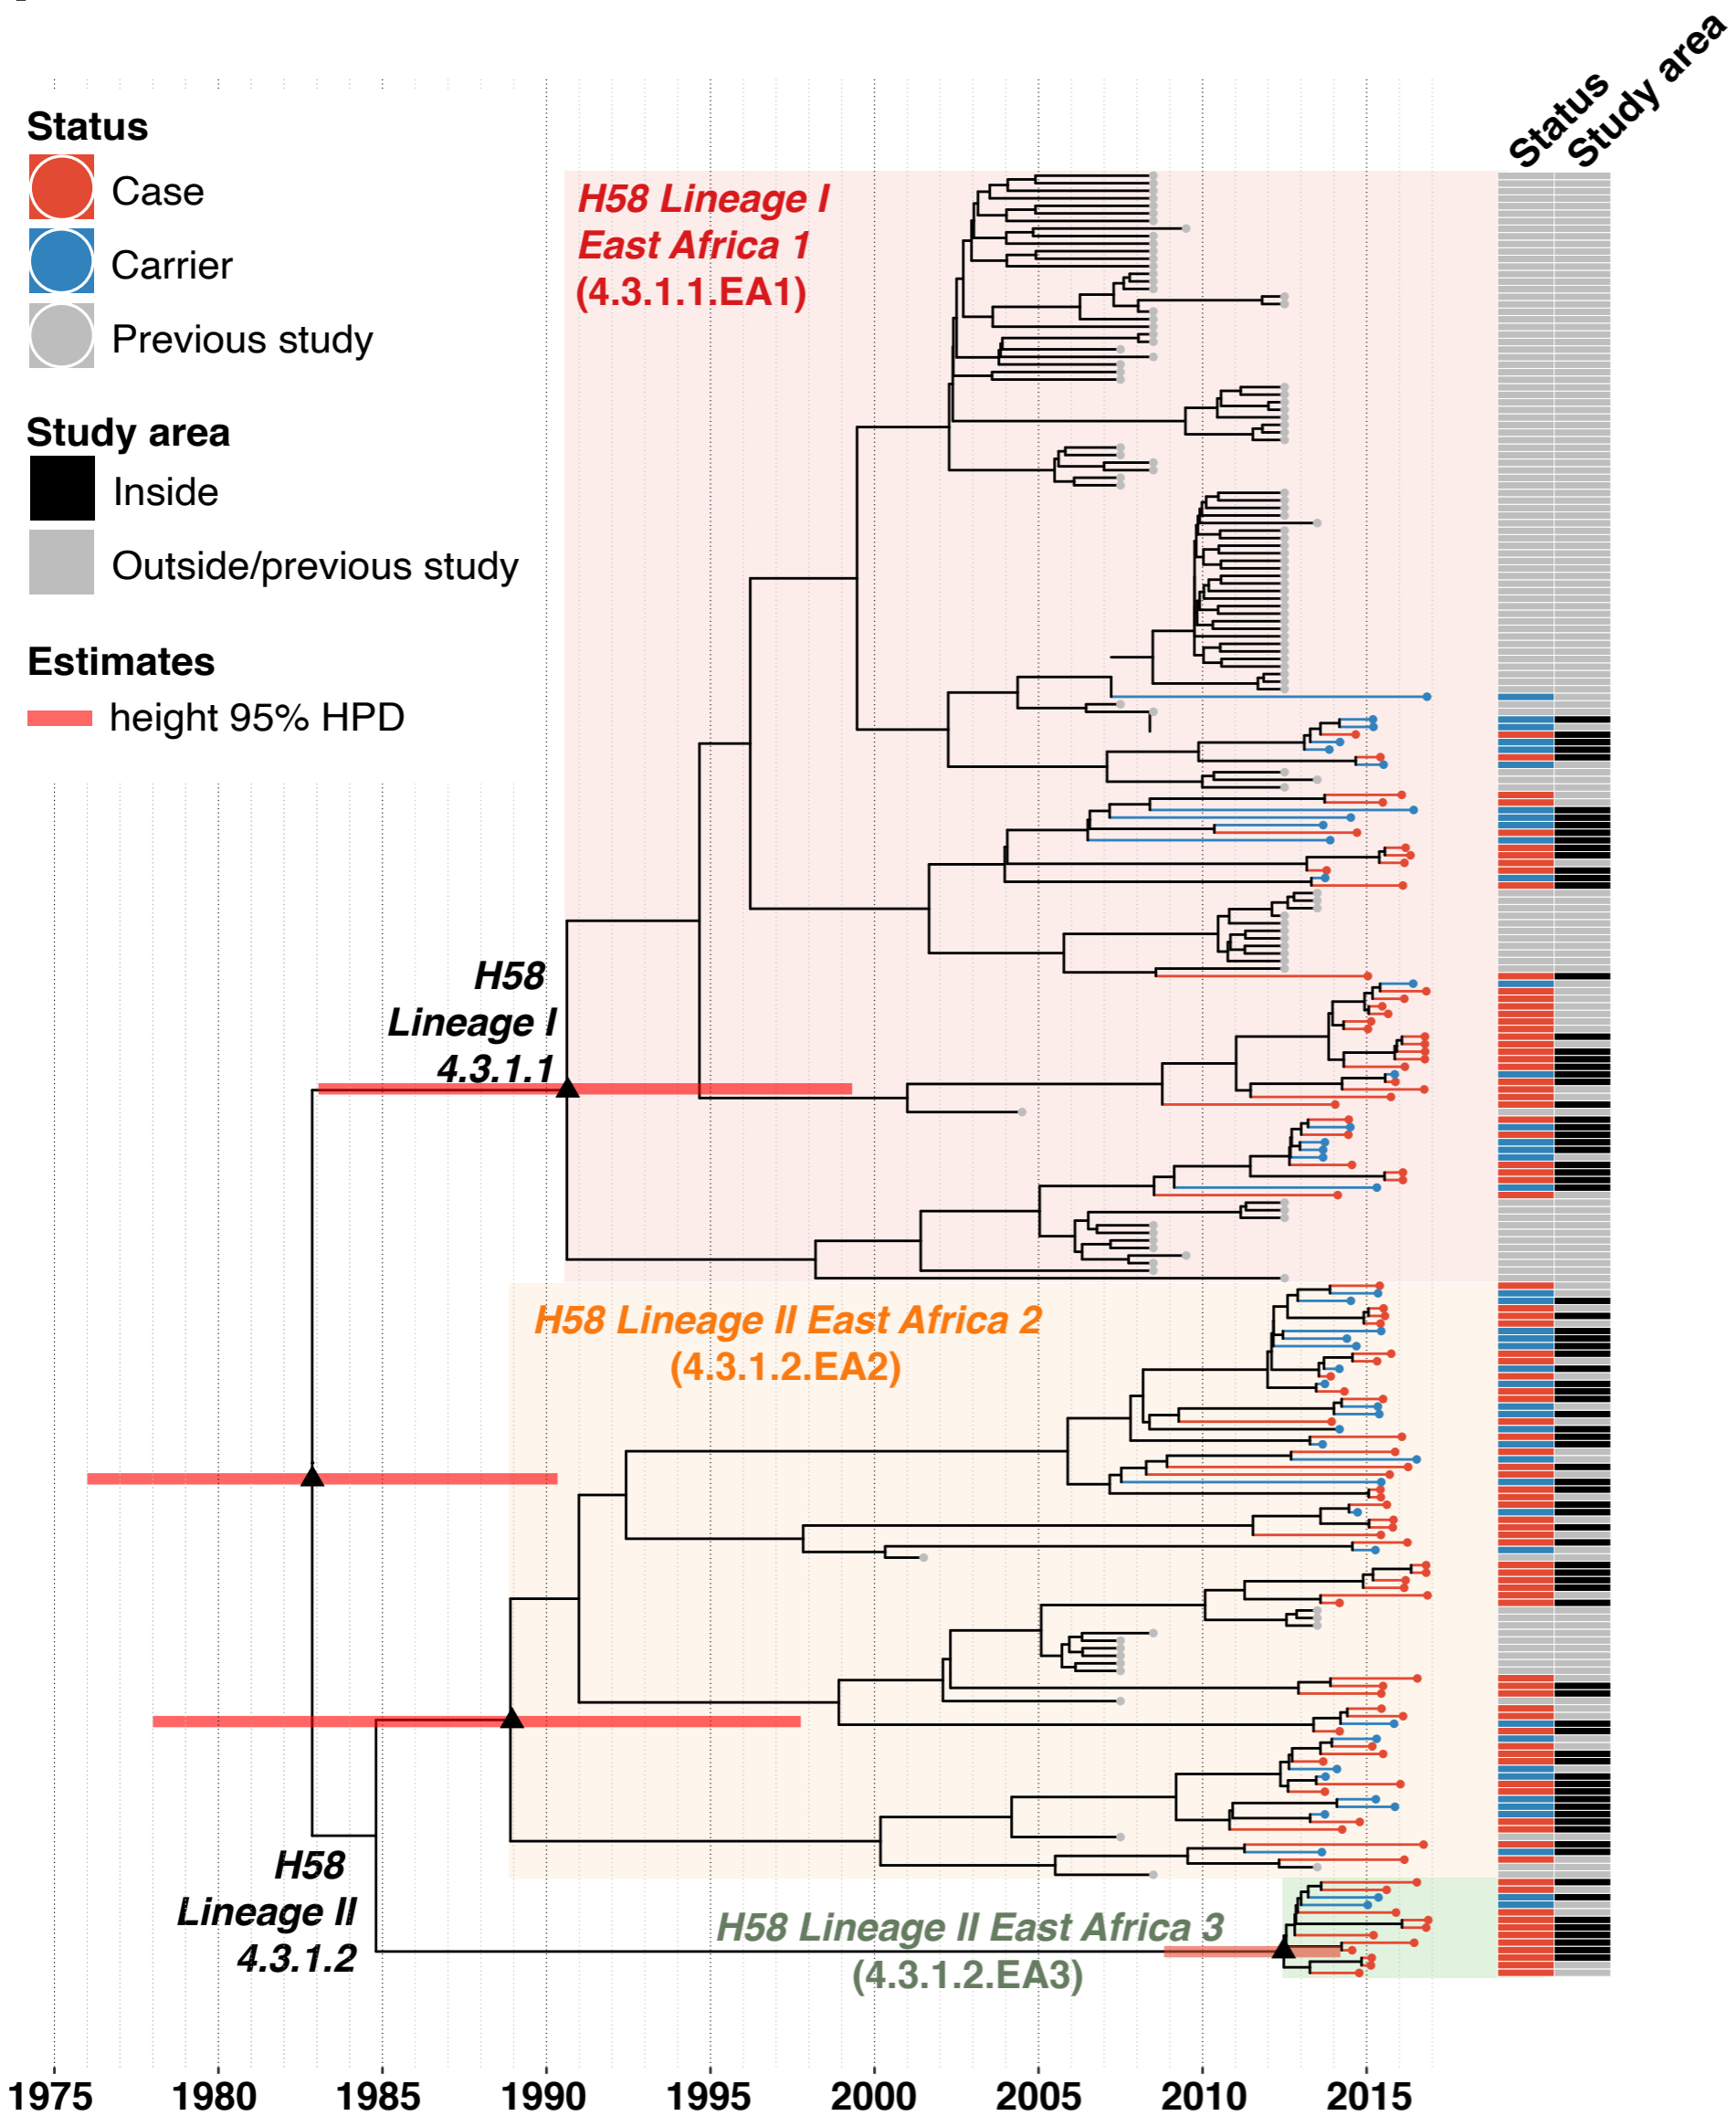

B

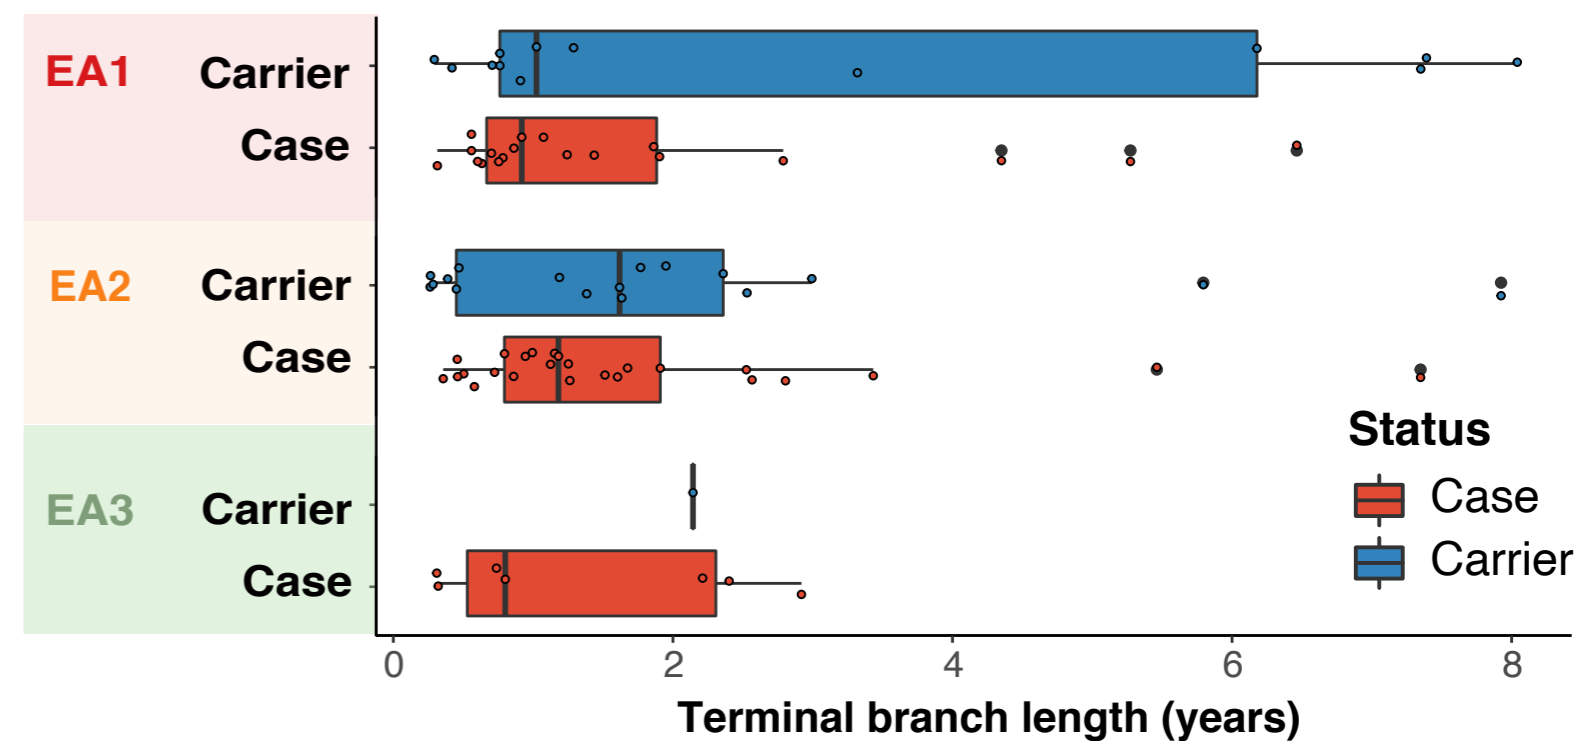

C

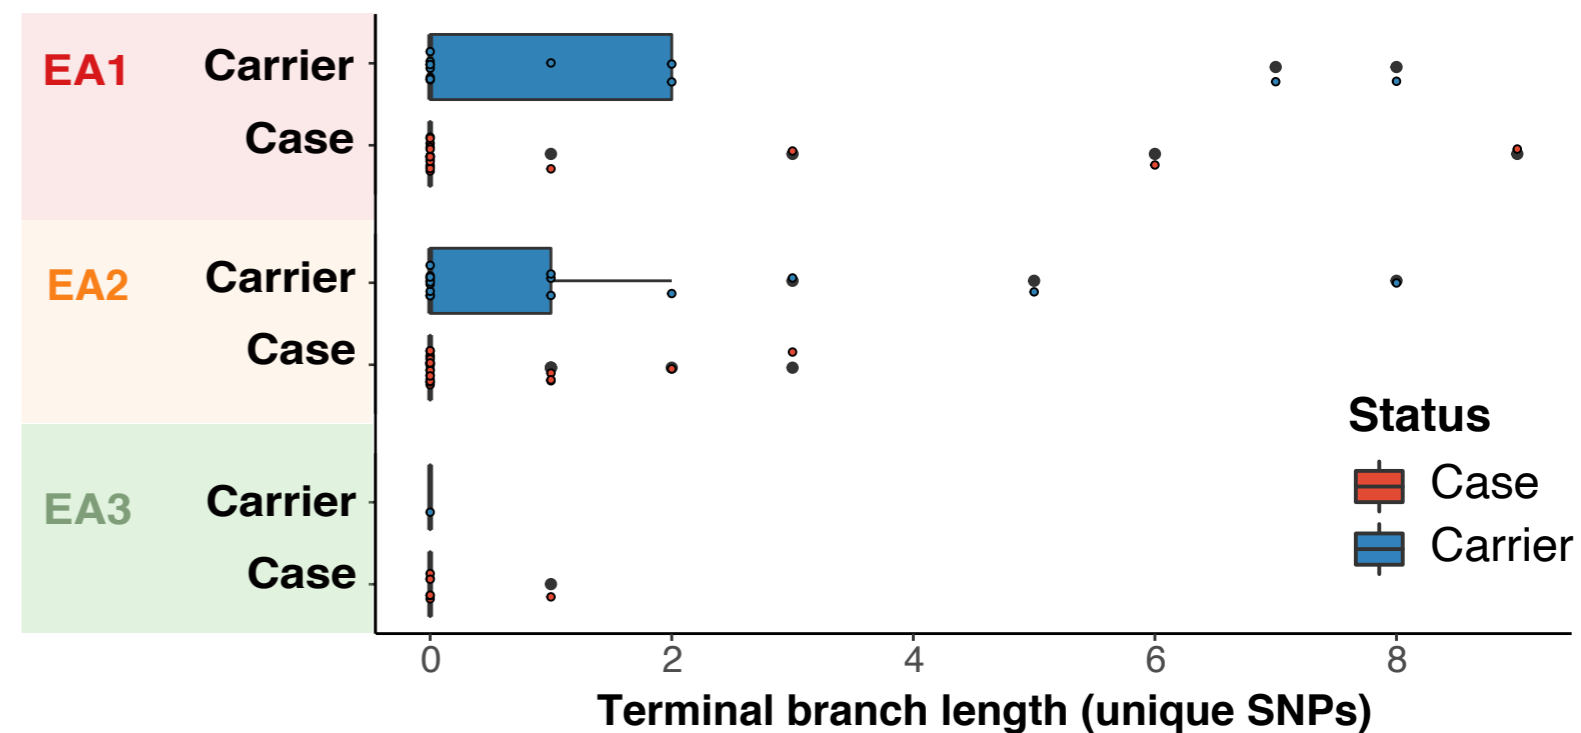

D

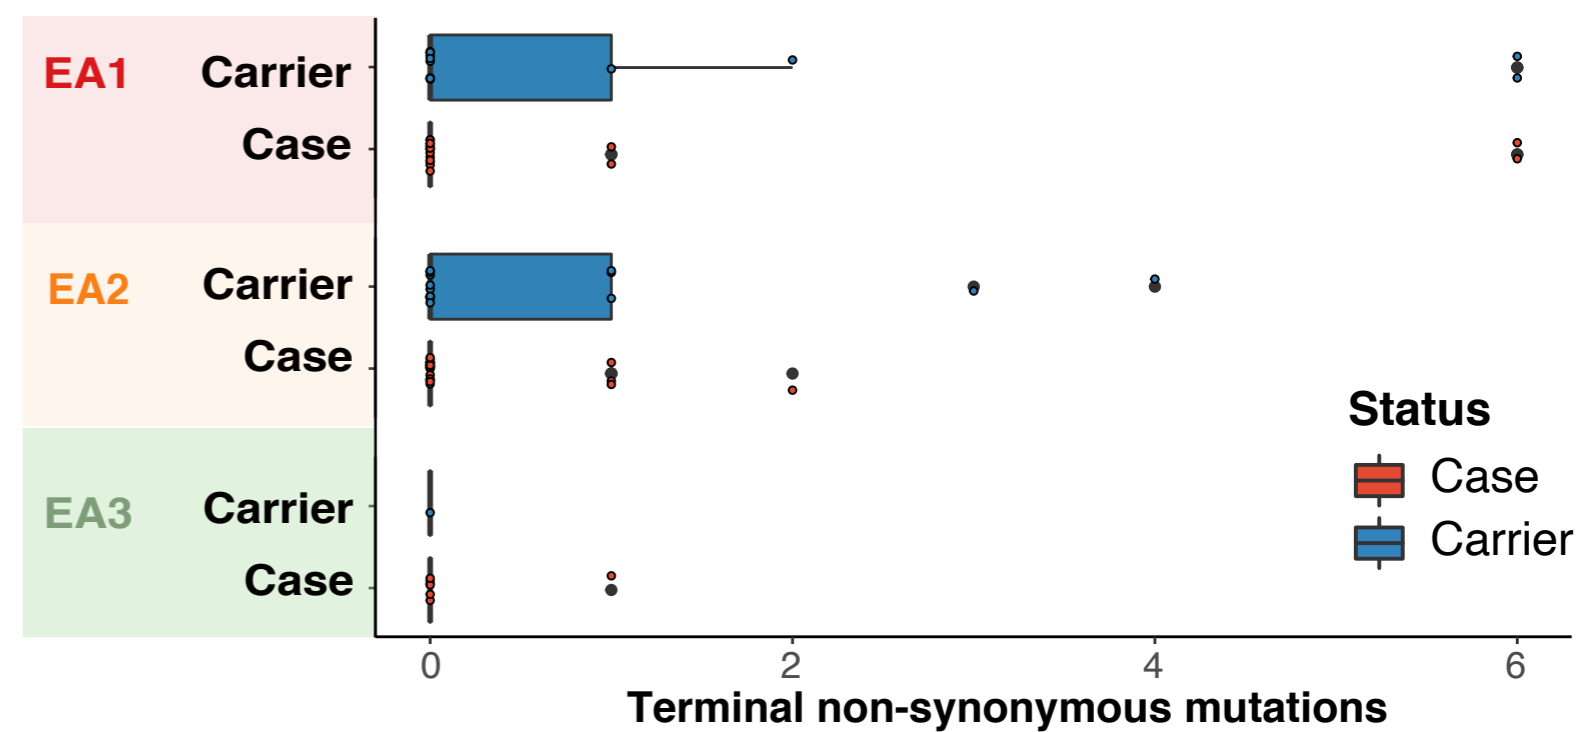

Supplement: supp [file elife-67852-supp-v1.zip › elife_poa_e67852_Figure_4_figure_supplement_3.pdf]
